# Supplementary material for: N-Fluorobenzenaminium tetrafluoroborate generated in situ by aniline and Selectfluor as a reusable catalyst for the ring opening of epoxides with amines under microwave irradiation
Source: Royal Society of Chemistry journal article supplement (doi:10.1039/c4cy00609g), 2014-07-22
Supplement: c4cy00609g1.pdf [file c4cy00609g1.pdf]

# **N-Fluorobenzenaminium tetrafluoroborate generated in situ by aniline and Selectfluor as a reusable catalyst for ring opening of epoxides with amines under microwave irradiations**

ManMohan Singh Chauhan, Geeta Devi Yadav, Firasat Hussain and Surendra Singh\*

*Department of chemistry, University of Delhi, Delhi-110007*

Email: [ssingh1@chemistry.du.ac.in](mailto:ssingh1@chemistry.du.ac.in)

## **Methods and materials**

Aniline and substituted aniline, morpholine and piperidine were purchased from S.D. Fine Chemicals, India. Styrene oxide, 1-hexene oxide, 1-decene oxide, 1-octene oxide, cyclohexene oxide, cyclopentene oxide and epichlorohydrin were used as received from Aldrich, USA. Proton and carbon nuclear magnetic resonance spectra ( $^1\text{H}$  and  $^{13}\text{C}$  NMR, respectively) were recorded on 400 MHz (operating frequencies:  $^1\text{H}$ , 400.13 MHz;  $^{13}\text{C}$ , 100.61 MHz) FT spectrometers at ambient temperature. In the case of  $^1\text{H}$  and  $^{13}\text{C}$  NMR spectra, the chemical shifts ( $\delta$ ) for all compounds are listed in parts per million downfield from tetramethylsilane using the NMR solvent as an internal reference. The reference values used for deuterated chloroform ( $\text{CDCl}_3$ ) were 7.26 and 77.00 ppm for  $^1\text{H}$  and  $^{13}\text{C}$  NMR spectra, respectively. Infrared spectra were recorded on a Perkin Elmer Spectrum BX-2 spectrophotometer. Optical rotation values were measured on a Rudolph Autopol (IV) Research Analytical. Single crystal X-ray diffraction was recorded on Oxford diffraction X-Calibur<sup>TM</sup> S. Thin layer chromatography was carried out using Merck Kieselgel 60 F254 silica gel plates. Column chromatography separations were performed using Merck Kieselgel 60 (Art. 7734).

## **Crystal Structure Analysis of (S)-1-(Naphthalen-2-yloxy)-3-piperidin-1-yl-propan-2-ol hydrochloride salt (21.HCl):**

$\text{C}_{18}\text{H}_{24}\text{NO}_2\text{Cl}$ , Mr = 321.83, monoclinic, space group:  $P2_1$ , a = 8.117(5), b = 7.669(5), c = 28.305(5) Å,  $\beta$  = 95.859(5)°, V = 1755.6(16) Å<sup>3</sup>,  $\rho_{\text{calcd.}}$  = 1.218 g·cm<sup>-3</sup>, Z = 4, F(000) = 688, crystal dimensions: 0.46×0.18×0.09 mm. The refinement converged at  $R_1$  = 0.0619,  $wR_2$  = 0.1098 for all data; final GOF: 1.003; largest peak/hole in the final difference Fourier map: 0.27/−0.16 e·Å<sup>-3</sup> and absolute structure parameter -0.07(6). Further details on the crystal structure data can be obtained from the Cambridge Crystallographic Data Centre via [www.ccdc.chem.ac.uk/data\\_request/cif](http://www.ccdc.chem.ac.uk/data_request/cif), on quoting the depository numbers CCDC. 895046

A total of 14095 reflections was collected at 273(2) K on an Oxford X calibur Ruby CCD diffractometer (MoK $\alpha$  radiation,  $\lambda$  = 0.71073 Å). Routine Lorentz and polarization corrections were applied, and an absorption correction was performed using the ABSCALE 3 program.<sup>1</sup> Direct methods were used to locate the heavy metal atoms (SHELXS-86). The remaining atoms were located from successive Fourier maps

(SHELXL-97).<sup>2</sup>The program PLATON was used to check the space group which falls in hexagonal system having chiral space group P 1 21 1 (Flack parameter -0.07(6)).<sup>3</sup>

## General procedure for the ring opening of epoxides with amines catalysed by Selectflour

A reaction mixture of epoxide (2 mmol), amine (2 mmol) and Selectflour (2 mol %) was irradiated under microwave for 10 minute at 70 °C temperature and 200W power. The crude product was purified over silica gel by column chromatography to provide pure  $\beta$ -amino alcohol.

## Synthesis of 2-(naphthalene-2-yloxy methyl) oxirane

2-naphthol (10 mmol, 1.44 gm) was stirred with KOH (10 mmol, 0.56gm) and methanol (11.33 ml) in a 250ml round bottom flask till the reaction mixture was completely dissolved. The solvent was evaporate by rota-vapour and we obtained dry potassium salt of 2-naphthol. The reaction flask was kept in an oil bath preheated 60 to 90 °C temperature then epichlorohydrin (100mmol, 7.83mL) was added both solvent as reagent. The reaction mixture further stirred at 60 °C for 30 minutes and cooled to room temperature. The brine solution was added to the reaction mixture. Product was extracted from the aq. solution using a sufficient amount of dichloromethane. The organic layer was dried over sodium sulphate and solvent was removed under reduce pressure. The product was purified by silica gel column chromatography using 90:10 (hexane: EtOAc) afforded 92% yield as viscous liquid.

The enantioenriched 2-(naphthalene-2-yloxymethyl) oxirane was obtained using Jacobsen hydrolytic kinetic resolution (HKR) with (*R, R*)-Jacobsen Cobalt (III)OAc and water as a resolving reagent.<sup>4</sup>

## Synthesis of 1-(chloromethyl)-1,4-diazabicyclo[2.2.2]octan-1-ium chloride<sup>16</sup>

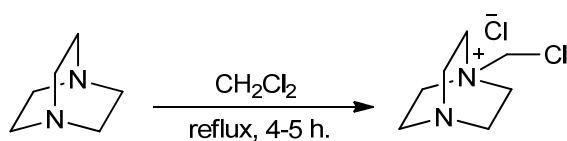

TEDA (2 g, 17.8 mmol) was dissolved in Dry DCM (5.6 mL, 89.03 mmol) and the mixture was allowed to reflux under inert atmosphere for 4 h. The dense white precipitate was formed and filtered under nitrogen atmosphere and washed with dry DCM (9 mL). The crude product was dried under vacuum to obtained 1-(chloromethyl)-1,4-diazabicyclo[2.2.2]octan-1-ium chloride (3.1 g., 90%).

## Chloride anion exchange of 1-(chloromethyl)-1,4-diazabicyclo[2.2.2]octan-1-ium chloride with tetrafluoroborate<sup>16</sup>

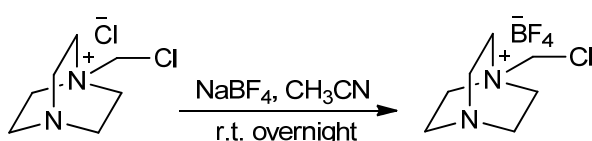

NaBF<sub>4</sub> (1.68 g., 15.5 mmol) in dry acetonitrile (10 mL) was added to a stirred slurry of 1-(chloromethyl)-1,4-diazabicyclo[2.2.2]octan-1-ium chloride (3 g., 15.5 mmol) in acetonitrile (20 mL). The mixture was stirred under inert atmosphere at room temperature for overnight. Precipitate of sodium chloride was formed. It was removed by filtration and washed with dry acetonitrile. The filtrate and washing were combined and evaporate under reduced pressure, leaving a white solid residue which was recrystallized from an ethanol/ethyl.

<sup>1</sup>H NMR (D<sub>2</sub>O, 400MHz): δ 4.97 (s, 2H), 3.41 (t, *J* = 6.59 Hz, 6H), 3.12 (t, *J* = 6.59 Hz, 6H) ppm. <sup>19</sup>F NMR (D<sub>2</sub>O, 376MHz): δ -148.14 ppm.

## Preparation of N-fluorobenzenaminium tetrafluoroborate

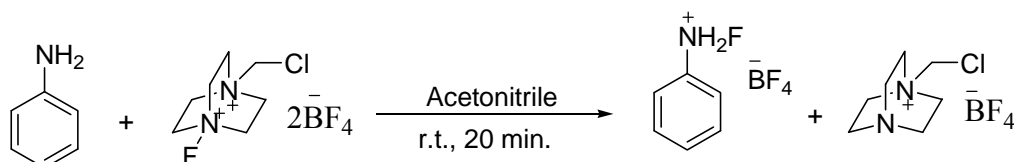

Aniline (1 mmol, 91 μL) was taken in acetonitrile (1 mL) and Selectfluor (1 mmol, 354 mg, in acetonitrile (1.3 mL)) was slowly added and stirred for 20 min. Acetonitrile was removed under reduced pressure and the resulting white solid was dissolved in the minimum amount of acetone and a solution of 10 mL solution of H<sub>2</sub>SO<sub>4</sub> (0.8 mmol, 42 μL) was added drop wise and precipitation of 1-chloromethyl-4-hydro-1,4-diazoniabicyclo [2.2.2] octane hydrogen sulphate tetrafluoroborate was removed by filtration. The filtrate was evaporated under vacuum to give N-fluorobenzenaminium tetrafluoroborate (107 mg, 96%).

<sup>1</sup>H NMR (D<sub>2</sub>O, 400MHz): δ 7.33-7.28 (m, 3H), 7.19-7.17 (m, 2H). <sup>19</sup>F NMR (D<sub>2</sub>O, 376MHz): δ -129.6, -150.6 ppm.

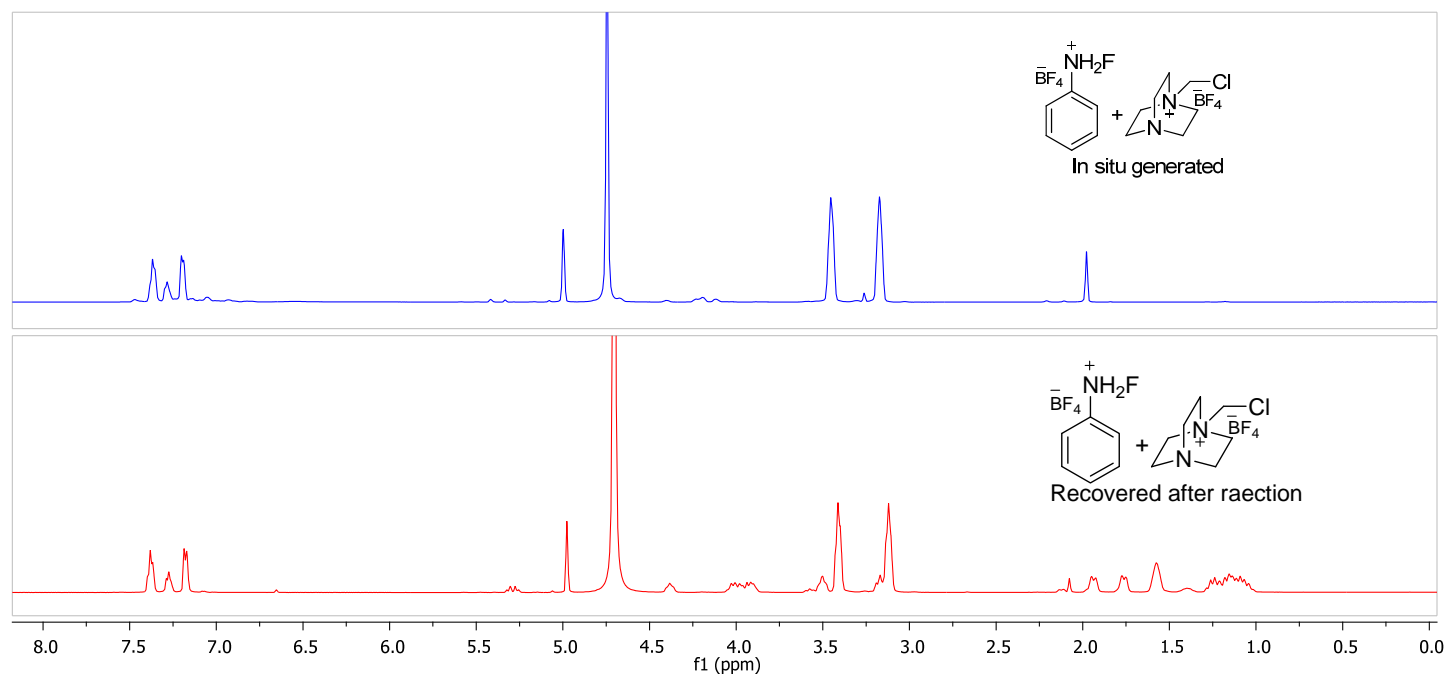

**Figure 1.** <sup>1</sup>H NMR of fresh in situ generated **1** and recovered catalyst in D<sub>2</sub>O.

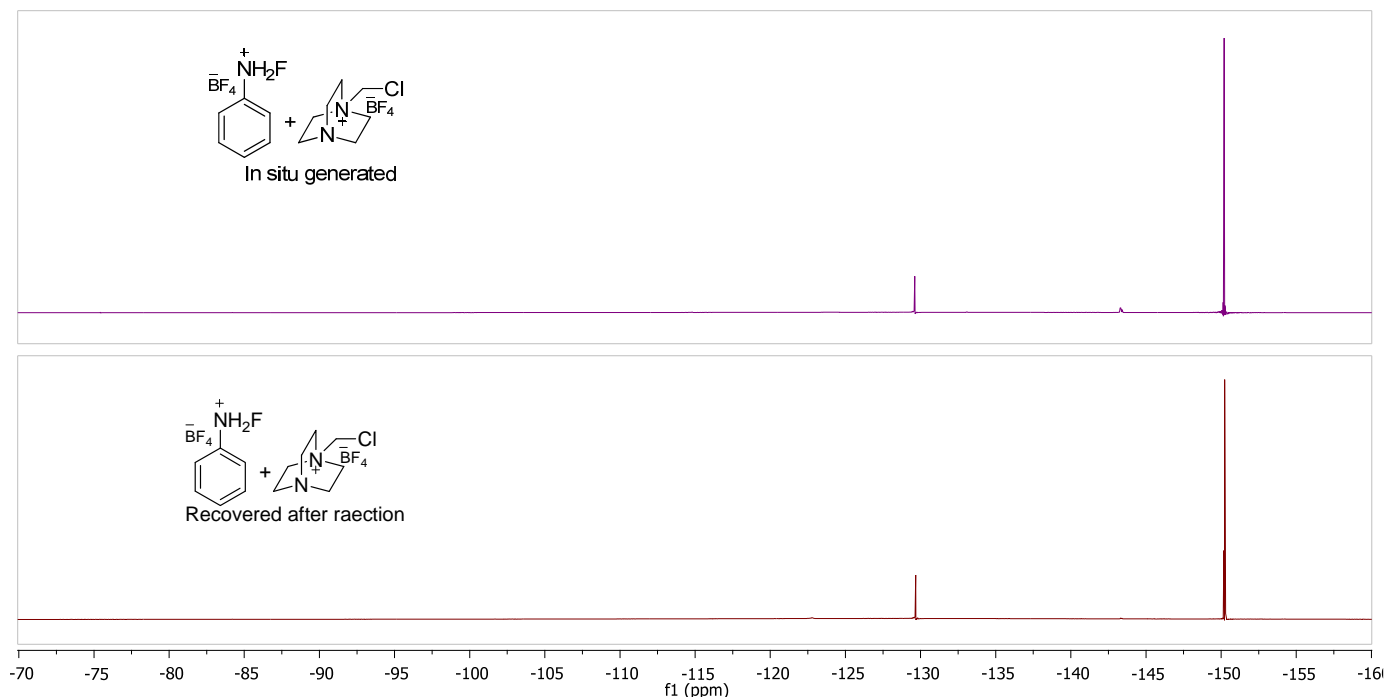

**Figure 2.**  $^{19}\text{F}$  NMR of in situ generate catalyst **1** and recovered catalyst in  $\text{D}_2\text{O}$ .

## Spectroscopic data for $\beta$ -aminoalcohols

### *Trans*-2-anilino-1-cyclohexanol (**6a**)<sup>5-9,11-12</sup>:

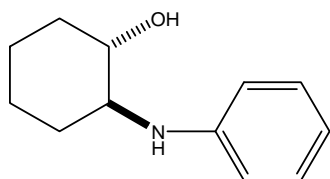

$^1\text{H}$  NMR ( $\text{CDCl}_3$ , 400MHz):  $\delta$  7.21 (m, 2H), 6.73-6.80 (m, 3H), 3.37 (ddd,  $J = 10.3, 8.8, 4.4$  Hz, 1H), 3.16 (ddd,  $J = 11.7, 9.5, 4.4$  Hz, 1H), 3.06 (brs, 2H), 2.15-2.12 (m, 2H), 1.80-1.74 (m, 2H), 1.36-1.30 (m, 3H), 1.11-1.01 (m, 1H) ppm;  $^{13}\text{C}$  NMR ( $\text{CDCl}_3$ , 100MHz)  $\delta$  147.5, 129.0 (2C), 117.9, 114.1 (2C), 73.9, 59.7, 33.0, 31.2, 24.6, 24.0 ppm; IR (liquid in  $\text{CH}_2\text{Cl}_2$ ): 3390, 2932, 1602, 1503, 1256, 1066, 748  $\text{cm}^{-1}$ .

### *Trans*-2-(*o*-methoxyphenylamino)cyclohexanol (**6b**)<sup>6,9,11</sup>:

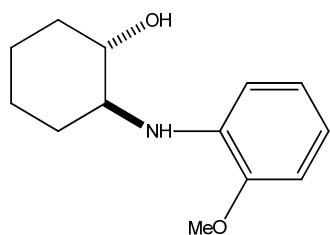

$^1\text{H}$  NMR ( $\text{CDCl}_3$ , 400MHz)  $\delta$  6.88-6.84 (m, 1H), 6.79-6.77 (m, 2H), 6.72-6.68 (m, 1H), 3.83 (3H, s), 3.41 (ddd,  $J = 10.9, 9.5, 4.4$  Hz, 1H), 3.14 (ddd,  $J = 10.9, 8.8, 3.7$  Hz, 1H), 2.10 (t,  $J = 13.9$  Hz, 2H), 1.69-1.78 (m, 2H), 1.28-1.36 (m, 3H), 1.11-1.02 (m, 1H) ppm;  $^{13}\text{C}$  NMR ( $\text{CDCl}_3$ , 100MHz)  $\delta$  147.2, 137.4, 121.1,

117.0, 111.2, 109.5, 74.3, 59.3, 55.2, 32.9, 31.3, 24.9, 24.1 ppm; IR (liquid in CH<sub>2</sub>Cl<sub>2</sub>) : 3407, 2931, 1601, 1512, 1222, 1068, 1029, 735 cm<sup>-1</sup>

***Trans*-2-(*p*-methoxyphenylamino)cyclohexanol (6c)<sup>5-7,11</sup>:**

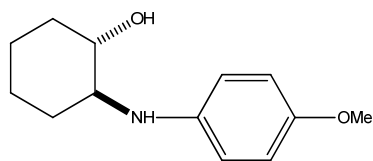

<sup>1</sup>H NMR (CDCl<sub>3</sub>, 400MHz) δ 6.75 (d, *J* = 9.5 Hz, 2H), 6.65 (d, *J* = 9.5 Hz, 2H), 3.72 (s, 3H), 3.29 (ddd, *J* = 10.9, 10.3, 4.4 Hz, 1H), 2.96 (ddd, *J* = 11.0, 9.5, 4.4 Hz, 1H), 2.07-2.05 (m, 2H), 1.73-1.65 (m, 2H), 1.39-1.20 (m, 3H), 1.01-0.93 (m, 1H) ppm; <sup>13</sup>C NMR (CDCl<sub>3</sub>, 100MHz) δ 152.6, 141.5, 116.3 (2C), 114.6 (2C), 74.0, 61.3, 55.5, 33.0, 31.3, 24.8, 24.1 ppm; IR (liquid in CH<sub>2</sub>Cl<sub>2</sub>) : 3369, 2931, 1512, 1239, 1065, 1038, 821 cm<sup>-1</sup>.

***Trans*-2-(*o*-tolylamino)cyclohexanol (6d)<sup>5,11</sup>:**

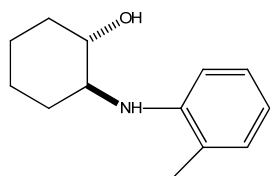

<sup>1</sup>H NMR (CDCl<sub>3</sub>, 400MHz) δ 7.12-7.07 (m, 2H), 6.79 (d, *J* = 8.1 Hz, 1H), 6.70 (t, *J* = 7.3, 1H), 3.42 (ddd, *J* = 10.9, 10.3, 4.4 Hz, 1H), 3.20 (ddd, *J* = 11.7, 9.5, 4.4 Hz, 1H), 2.15 (s, 3H), 2.15-2.13 (m, 1H), 1.79-1.72 (m, 3H), 1.38-1.30 (m, 3H), 1.1-1.0 (m, 1H) ppm; <sup>13</sup>C NMR (CDCl<sub>3</sub>, 100MHz) δ 145.6, 130.3, 127.0, 122.9, 117.7, 111.4, 74.4, 59.7, 33.1, 31.7, 24.9, 24.2, 17.6 ppm; IR (liquid in CH<sub>3</sub>CN) : 3405, 2931, 1605, 1511, 1378, 1258, 1066, 746 cm<sup>-1</sup>

***Trans*-2-(*p*-tolylamino)cyclohexanol (6e)<sup>6,9</sup>:**

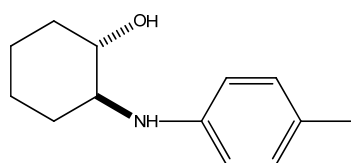

<sup>1</sup>H NMR (CDCl<sub>3</sub>, 400MHz) δ 7.0 (d, *J* = 8.8 Hz, 2H), 6.64 (d, *J* = 8.8 Hz, 2H), 3.31 (ddd, *J* = 9.9, 8.8, 4.4 Hz, 1H), 3.14 (brs, 2H), 3.08 (ddd, *J* = 11.7, 9.5, 4.4 Hz, 1H), 2.26(s, 3H), 2.13-2.05 (m, 2H), 1.77-1.69 (m, 2H), 1.35-1.27 (m, 3H), 1.05-0.97 (m, 1H) ppm; <sup>13</sup>C NMR (CDCl<sub>3</sub>, 100MHz) δ 145.3, 129.6 (2C), 127.5, 114.6 (2C), 74.2, 60.4, 33.0, 31.3, 24.9, 24.1, 20.2 ppm; IR (liquid in CH<sub>2</sub>Cl<sub>2</sub>) : 3388, 2930, 1617, 1518, 1375, 1252, 1066, 808 cm<sup>-1</sup>.

***Trans*-2-(phenylamino)cyclopentanol (7a)<sup>5-9</sup>:**

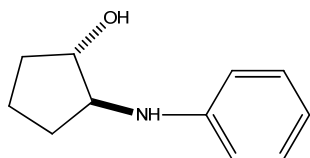

$^1\text{H}$  NMR ( $\text{CDCl}_3$ , 400MHz)  $\delta$  7.17 (t,  $J = 7.3$  Hz, 2H), 6.71 (t,  $J = 7.3$  Hz, 1H), 6.65 (d,  $J = 8.1$  Hz, 2H), 4.02 (dd,  $J = 10.3, 4.4$  Hz, 1H), 3.58 (dd,  $J = 6.6, 4.4$  Hz, 1H), 2.75 (brs, 2H), 2.29-2.21 (m, 1H), 1.98-1.91 (m, 1H), 1.82-1.68 (m, 2H), 1.66-1.57 (m, 1H), 1.42-1.33 (m, 1H) ppm;  $^{13}\text{C}$  NMR ( $\text{CDCl}_3$ , 100MHz)  $\delta$  147.6, 129.2 (2C), 117.4 (2C), 113.3, 78.0, 61.9, 32.6, 31.0, 20.8 ppm; IR (liquid in  $\text{CH}_2\text{Cl}_2$ ) : 3396, 2917, 1602, 1503, 1277, 1044, 749  $\text{cm}^{-1}$

***Trans*-2-(*o*-methoxyphenylamino)cyclopentanol (7b)<sup>6</sup>:**

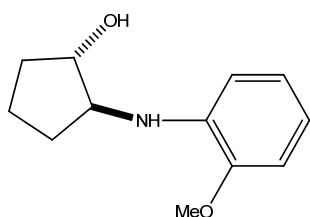

$^1\text{H}$  NMR ( $\text{CDCl}_3$ , 400MHz)  $\delta$  6.86-6.66 (m, 4H), 4.08 (dd,  $J = 9.5, 4.4$  Hz, 1H), 3.83 (s, 3H), 3.59 (dd,  $J = 6.6, 4.4$  Hz, 1H), 2.29-2.24 (m, 1H), 2.00-1.94 (m, 1H), 1.81-1.74 (m, 2H), 1.65-1.60 (m, 1H), 1.46-1.41 (m, 1H) ppm;  $^{13}\text{C}$  NMR ( $\text{CDCl}_3$ )  $\delta$  146.7, 137.5, 120.9, 116.5, 110.3, 109.3, 78.1, 61.7, 55.3, 32.8, 31.1, 21.0 ppm; IR (liquid in  $\text{CH}_2\text{Cl}_2$ ) : 3412, 2959, 1602, 1513, 1222, 1028, 738  $\text{cm}^{-1}$

***Trans*-2-(*p*-methoxyphenylamino)cyclopentanol (7c)<sup>5</sup>:**

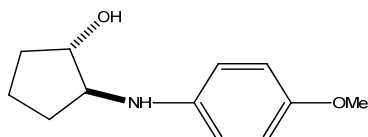

$^1\text{H}$  NMR ( $\text{CDCl}_3$ )  $\delta$  6.75 (d,  $J = 9.5$ , 2H), 6.64-6.61 (d,  $J = 9.5$ , 2H), 4.01 (dd,  $J = 10.9, 5.1$  Hz, 1H), 3.73 (s, 3H), 3.51 (dd,  $J = 7.3, 5.1$  Hz, 1H), 2.75 (brs, 2H), 2.25-2.19 (m, 1H), 1.98-1.93 (m, 1H), 1.80-1.69 (m, 2H), 1.63-1.58 (m, 1H), 1.38-1.33 (m, 1H) ppm;  $^{13}\text{C}$  NMR ( $\text{CDCl}_3$ )  $\delta$  152.2, 141.7, 116.4(2C), 114.7(2C), 78.1, 62.9, 55.7, 32.7, 31.0, 20.8 ppm; IR (liquid in  $\text{CH}_2\text{Cl}_2$ ): 3378, 2955, 1512, 1238, 1099, 1037, 821  $\text{cm}^{-1}$

***Trans*-2-(*o*-tolylamino)cyclopentanol (7d)<sup>5,7,8</sup>:**

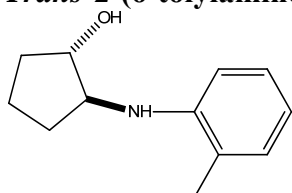

$^1\text{H}$  NMR ( $\text{CDCl}_3$ , 400MHz)  $\delta$  7.23 (t,  $J = 8.1$  Hz, 1H), 7.16 (d,  $J = 7.3$  Hz, 1H), 6.84 (d,  $J = 8.1$  Hz, 1H), 6.78 (t,  $J = 7.3$  Hz, 1H), 4.17 (dd,  $J = 10.3, 4.4$  Hz, 1H), 3.74 (dd,  $J = 6.5, 3.7$  Hz, 1H), 2.42-2.36 (m, 1H), 2.22 (s, 3H), 2.09-2.05 (m, 1H), 1.94-1.86 (m, 2H), 1.74-1.72 (m, 1H), 1.55-1.49 (m, 1H) ppm;  $^{13}\text{C}$  NMR

(CDCl<sub>3</sub>, 100 MHz)  $\delta$  145.5, 130.0, 127.0, 121.9, 117.0, 110.6, 78.0, 61.8, 32.7, 31.3, 21.0, 17.4 ppm; IR (liquid in CH<sub>3</sub>CN): 3406, 2960, 1605, 1511, 1378, 1264, 1052, 748 cm<sup>-1</sup>

**Trans-2-(p-tolylamino)cyclopentanol (7e)<sup>6</sup>:**

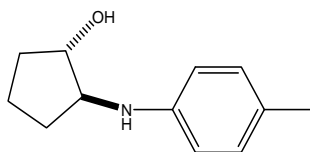

<sup>1</sup>H NMR (CDCl<sub>3</sub>, 400MHz)  $\delta$  7.01 (d,  $J$  = 8.1 Hz, 2H), 6.62 (d,  $J$  = 8.1 Hz, 2H), 4.02 (dd,  $J$  = 10.3, 5.1 Hz, 1H), 3.56 (dd,  $J$  = 6.6, 4.4 Hz, 1H), 3.34 (brs, 2H), 2.26 (s, 3H), 2.25-2.22 (m, 1H), 1.97-1.93 (m, 1H), 1.80-1.71 (m, 2H), 1.62-1.61 (m, 1H), 1.41-1.37 (m, 1H) ppm; <sup>13</sup>C NMR (CDCl<sub>3</sub>, 100MHz)  $\delta$  144.9, 129.6 (2C), 126.9, 113.8 (2C), 76.6, 62.4, 32.4, 30.7, 20.7, 20.2 ppm; IR (liquid in CH<sub>2</sub>Cl<sub>2</sub>) : 3369, 2960, 1618, 1519, 1302, 1261, 1041, 808 cm<sup>-1</sup>

**1-phenyl-2-(phenylamino)ethanol (19)<sup>9,11</sup>:**

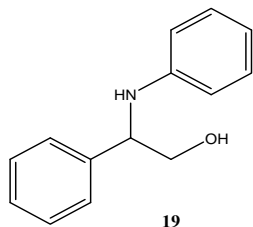

<sup>1</sup>H NMR (CDCl<sub>3</sub>, 400MHz)  $\delta$  7.37-7.25 (m, 5H), 7.12-7.08 (m, 2H), 6.69-6.55 (m, 3H), 4.47 (dd,  $J$  = 7.3, 4.4 Hz, 1H), 3.90 (dd,  $J$  = 10.9, 3.7 Hz, 1H), 3.71 (dd,  $J$  = 10.9, 7.3 Hz, 1H) ppm; <sup>13</sup>C NMR (CDCl<sub>3</sub>, 100MHz)  $\delta$  147.1, 140.0, 128.9(2C), 128.5(2C), 127.3 (2C), 126.5 (2C), 117.6, 113.6, 66.9, 59.6 ppm; IR (liquid in CH<sub>2</sub>Cl<sub>2</sub>) : 3393, 2927, 1602, 1503, 1267, 1066, 751 cm<sup>-1</sup>

**1-chloro-3-(phenylamino)propan-2-ol (17)<sup>9</sup> :**

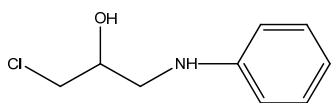

<sup>1</sup>H NMR (CDCl<sub>3</sub>, 400MHz)  $\delta$  7.16 (t,  $J$  = 7.7 Hz, 2H), 6.74 (t,  $J$  = 7.3 Hz, 1H), 6.65 (d,  $J$  = 8.8 Hz, 2H), 4.07-4.04 (m, 1H), 3.67-3.62 (m, 2H), 3.36 (dd,  $J$  = 13.2, 4.4 Hz, 1H), 3.21 (dd,  $J$  = 13.2, 8.1 Hz, 1 H) ppm; <sup>13</sup>C NMR (CDCl<sub>3</sub>, 100MHz)  $\delta$  147.6, 129.6 (2C), 118.6, 113.2(2C), 69.7, 47.6, 47.0 ppm; IR (liquid in CH<sub>3</sub>CN): 3341, 2925, 1601, 1261, 1074, 750, 694 cm<sup>-1</sup>

**1-(phenylamino)hexan-2-ol (11a) and 2-(phenylamino)hexan-1-ol (11b)<sup>12</sup> :**

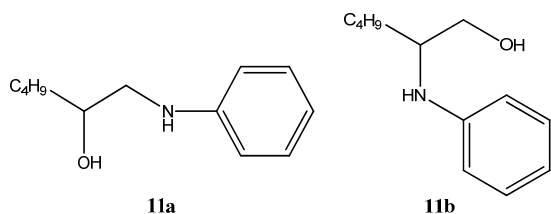

The compound **11a** was obtained as major regioisomer with ratio of **11a:11b** (77:23), the ratio of regioisomer was determined by  $^1\text{H}$  NMR by integrating peaks at  $\delta$  3.72 and 3.64 ppm corresponding to compound **11a** and **11b**.

$^1\text{H}$  NMR ( $\text{CDCl}_3$ , 400MHz)  $\delta$  7.21-7.20 (m, 2H), 6.64 (t,  $J = 7.3$  Hz, 1H), 6.55 (d,  $J = 7.3$  Hz, 2H), 3.72-3.71 (m, 1H), 3.15 (dd,  $J = 12.5, 2.9$  Hz, 1H), 2.90 (dd,  $J = 13.2, 8.8$  Hz, 1H), 1.43-1.25 (m, 6H), 0.86-0.82 (t, 3H) ppm;  $^{13}\text{C}$  NMR ( $\text{CDCl}_3$ , 100MHz) (Major)  $\delta$  148.2, 129.2 (2C), 117.74, 113.54 (2C), 70.20, 50.16, 34.71, 27.17, 22.66, 13.95 ppm; (Minor)  $\delta$  147.73, 129.29(2C), 117.68, 113.58(2C), 64.31, 55.19, 31.79, 28.26, 13.93 ppm; IR (liquid in  $\text{CH}_2\text{Cl}_2$ ): 3393, 2930, 1603, 1504, 1257, 1061, 748  $\text{cm}^{-1}$

### 1-(phenylamino)decan-2-ol (**13**):

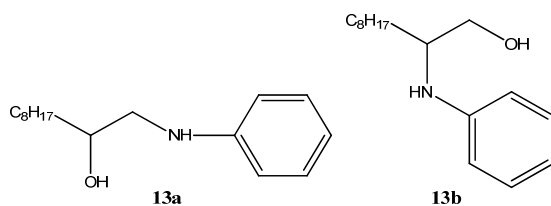

The compound **13a** was obtained as major regioisomer with ratio of **13a:13b** (79:21), the ratio of regioisomer was determined by  $^1\text{H}$  NMR by integrating peaks at  $\delta$  3.83 and 3.75 ppm corresponding to compound **13a** and **13b**.

$^1\text{H}$  NMR ( $\text{CDCl}_3$ , 400MHz)  $\delta$  7.21 (t,  $J = 7.3$  Hz, 2H), 6.77 (t,  $J = 7.3$  Hz, 1H) 6.67 (d,  $J = 5.9$  Hz, 2H), 3.81-3.84 (m, 1H), 3.26 (dd,  $J = 13.2, 3.7$  Hz, 1H), 2.99 (dd,  $J = 13.2, 8.8$  Hz, 1H), 1.33 (brs, 14H), 0.93-0.96 (t, 3H) ppm;  $^{13}\text{C}$  NMR ( $\text{CDCl}_3$ , 100MHz) (Major)  $\delta$  148.24, 129.34(2C), 117.82, 113.27(2C), 70.35, 64.47, 55.36, 50.31, 35.08, 31.84, 29.65, 25.61, 22.64, 14.10 ppm; (Minor)  $\delta$  147.74, 129.24(2C), 117.59, 113.55(2C), 64.03, 55.08, 31.97, 30.79, 29.71, 29.41, 29.15, 26.07 ppm; IR (liquid in  $\text{CH}_2\text{Cl}_2$ ) : 3393, 2925, 1603, 1505, 1258, 1072, 748  $\text{cm}^{-1}$

### *Trans*-8-(phenylamino)cyclooct-4-enol (**9**)<sup>10,11</sup>:

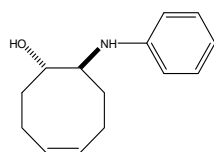

$^1\text{H}$  NMR ( $\text{CDCl}_3$ , 400MHz)  $\delta$  7.14-7.05 (m, 2H), 6.74-6.60 (m, 3H), 5.67-5.63 (m, 1H), 5.52-5.45 (m, 1H), 3.57 (ddd,  $J = 11.7, 8.1, 3.7$  Hz, 1H), 3.39 (ddd,  $J = 11.7, 8.8, 3.7$  Hz, 1H), 2.40-2.29 (m, 2H), 2.23-2.16 (m, 2H), 2.04-1.91 (m, 2H), 1.69-1.61 (m, 1H), 1.50-1.42 (m, 1H) ppm;  $^{13}\text{C}$  NMR ( $\text{CDCl}_3$ , 100MHz)  $\delta$  147.8,



130.4, 129.0 (2C), 127.6, 118.7, 114.7 (2C), 72.7, 58.7, 33.1, 31.8, 23.1, 22.6 ppm; IR (liquid in CH<sub>2</sub>Cl<sub>2</sub>): 3389, 2930, 1601, 1499, 1252, 1050, 869, 750, 698 cm<sup>-1</sup>.

**1-(naphthalen-2-yloxy)-3-(phenylamino)propan-2-ol (17)**<sup>8,13,14</sup>:

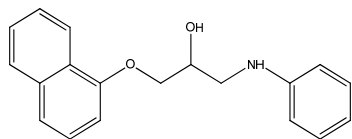

<sup>1</sup>H NMR (CDCl<sub>3</sub>, 400MHz) δ 7.80-7.72 (m, 3H), 7.48-7.44 (m, 1H), 7.39-7.35 (m, 1H), 7.21-7.19 (m, 4H), 6.77(t, *J* = 7.3, 1H), 6.70 (d, *J* = 7.3 Hz, 2H), 4.35-4.29 (m, 1H), 4.20-4.13 (m, 2H), 3.47 (dd, *J* = 13.2, 4.4 Hz, 1H), 3.34 (dd, *J* = 13.2, 7.3 Hz, 1H); <sup>13</sup>C NMR (CDCl<sub>3</sub>, 100MHz) δ 156.2, 147.9, 134.3, 129.4, 129.2(2C), 129.0, 127.5, 126.7, 126.4, 123.8, 118.4, 117.9, 113.2(2C), 106.8, 70.0, 68.6, 46.5 ppm; IR (liquid in CH<sub>2</sub>Cl<sub>2</sub>) 3400, 2927, 1629, 1602, 1258, 1034, 750 cm<sup>-1</sup>

**(S)-1-(naphthalen-2-yloxy)-3-(piperidin-1-yl)propan-2-ol (21)**:

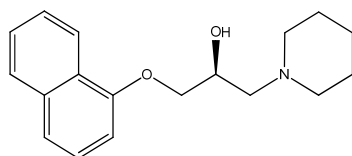

<sup>1</sup>H NMR (CDCl<sub>3</sub>, 400MHz) δ 7.69-7.63 (m, 3H), 7.37-7.07 (m, 4H), 4.11-4.05 (m, 1H), 4.01-3.97 (m, 2H), 3.22(brs, 1H), 2.60-2.51 (m, 2H), 2.47-2.33 (m, 4H), 1.58-1.50 (m, 4H), 1.40-1.37 (m, 2H) ppm; <sup>13</sup>C NMR (CDCl<sub>3</sub>, 100MHz) : δ 156.7, 134.4, 129.3, 129.0, 127.6, 126.7, 126.3, 123.6, 118.9, 106.6, 70.4, 65.2, 61.2, 54.7 (2C), 25.9 (2C), 24.1 ppm; IR (liquid in CH<sub>2</sub>Cl<sub>2</sub>) : 3401, 2931, 1629, 1600, 1258, 1218, 1037, 747 cm<sup>-1</sup>

**(S)-1-morpholino-3-(naphthalen-2-yloxy)propan-2-ol (22)**:

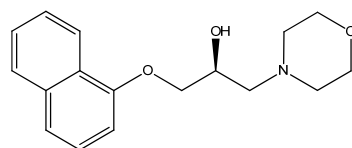

<sup>1</sup>H NMR (CDCl<sub>3</sub>, 400 MHz) δ 8.17-8.15 (m, 1H), 7.73-7.71 (m, 1H), 7.43-7.18 (m, 4H), 6.74(d, *J* = 7.3 Hz, 1H), 4.29-4.23 (m, 1H), 4.15-4.12 (m, 1H), 4.07-4.03 (m, 1H), 3.75-3.66 (m, 4H), 2.73-2.65 (m, 4H), 2.56-2.54 (m, 2H), ppm; <sup>13</sup>C NMR (CDCl<sub>3</sub>, 100MHz) δ 154.2, 134.4, 127.5, 126.4, 125.8, 125.5, 125.2, 121.8, 120.6, 104.8, 70.3, 66.6(2C), 65.6, 61.4, 53.7 (2C) ppm; IR (liquid in CH<sub>2</sub>Cl<sub>2</sub>): 3419, 2922, 1628, 1518, 1270, 1241, 1117, 1035, 1070, 772 cm<sup>-1</sup>

**2-(piperidin-1-yl)cyclohexanol :**<sup>9</sup>

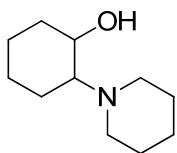

$^1\text{H}$  NMR (400 MHz,  $\text{CDCl}_3$ )  $\delta$  3.34-3.28 (m, 1H), 2.65-2.59 (m, 2H), 2.27 (brs, 2H), 2.12-2.04 (m, 2H), 1.75-1.70 (m, 2H), 1.66-1.64 (m, 1H), 1.60-1.44 (m, 4H), 1.40-1.34 (m, 2H), 1.24-1.04 (m, 6H) ppm.  $^{13}\text{C}$  NMR (100 MHz,  $\text{CDCl}_3$ )  $\delta$  70.94, 68.49, 49.73 (2C), 33.20, 26.66 (2C), 25.58, 24.79, 24.06, 22.09 ppm.

### 2-morpholinocyclohexanol :<sup>9</sup>

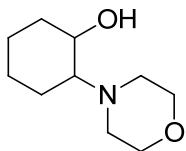

$^1\text{H}$  NMR (400 MHz,  $\text{CDCl}_3$ )  $\delta$  4.59 (brs, 1H), 3.71-3.67 (m, 4H), 3.38-3.32 (m, 1H), 2.72-2.69 (m, 2H), 2.44-2.43 (m, 2H), 2.19-2.18 (m, 1H), 2.09-2.06 (m, 1H), 1.80-1.73 (m, 2H), 1.67-1.65 (m, 1H), 1.16-1.11 (m, 4H) ppm.  $^{13}\text{C}$  NMR (100 MHz,  $\text{CDCl}_3$ )  $\delta$  70.46, 68.34, 67.37 (2C), 48.65 (2C), 33.11, 25.36, 23.94, 22.19 ppm.

### 2-(benzylamino)cyclohexanol :<sup>9</sup>

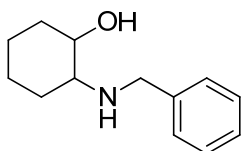

$^1\text{H}$  NMR (400 MHz,  $\text{CDCl}_3$ )  $\delta$  7.33-7.22 (m, 5H), 3.93 (d,  $J = 13.18$  Hz, 1H), 3.67 (d,  $J = 13.18$  Hz, 1H), 3.22-3.18 (m, 2H), 2.34-2.28 (m, 1H), 2.13-2.09 (m, 1H), 1.95-1.93 (m, 1H), 1.70-1.67 (m, 2H), 1.25-1.16 (m, 3H) ppm.  $^{13}\text{C}$  NMR (100 MHz,  $\text{CDCl}_3$ ) 139.48, 128.32 (2C), 128.12 (2C), 127, 73.1, 62.8, 50.45, 33.43, 29.85, 24.75, 24.18 ppm.

### 2-((1-phenylethyl)amino)cyclohexanol :<sup>15</sup>

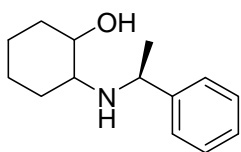

$^1\text{H}$  NMR (400 MHz,  $\text{CDCl}_3$ )  $\delta$  7.29-7.16 (m, 5H), 3.89-3.84 (q,  $J = 6.59$  Hz, 1H), 3.07-3.02 (m, 1H), 2.30-2.24 (m, 1H), 2.0-1.95 (m, 1H), 1.87-1.83 (m, 1H), 1.63-1.56 (m, 2H), 1.28 (d, 3H), 1.22-1.08 (m, 4H) ppm.  $^{13}\text{C}$  NMR (100 MHz,  $\text{CDCl}_3$ ) 146.68, 128.44 (2C), 127.02, 126.38 (2C), 74.02, 61.51, 55.21, 32.94, 31.25, 25.35, 24.20, 23.42 ppm.

## References

1. CrysAlis Pro software system, Version 171.32; Oxford Diffraction Ltd., Oxford, U.K., 2007.
2. G. M. Sheldrick, Acta. Cryst. A64 (2008) 112.
3. L. Spek J. Appl. Cryst. 2003, **36**, 7-13.

4. M. Tokunaga, J. F. Larrow, F. Kakiuchi, and E. N. Jacobsen, *Science* 1997, **277**, 936.
5. S. Chandrasekhar, T. Ramchander, and S. J. Prakash, *Synthesis* 2000, 831.
6. T. Ollevier, and G. Lavie-Campin, *Tetrahedron Lett.* 2002, **43**, 7891.
7. N. R. Swamy, G. Kandaji, and G. Nagaiah, *Synth. Commun.* 2002, **13**, 2307.
8. G. Sabhita, G. S. K. K. Reddy, K. B. Reddy, and J. S. Yadav, *Synthesis*, 2003, 2298.
9. A. K. Chakraborti, and A. Kondaskar, *Tetrahedron Lett.* 2003, **44**, 8315.
10. G. Sekar, and V. K. Singh, *J. Org. Chem.* 1999, **64**, 287.
11. M. Curini, F. Epifano, M. C. Marcotullio, and O. Rosati, *Eur. J. Org. Chem.* 2001, 4149.
12. R. I. Kureshy, S. Singh, N. H. Khan, S. H. R. Abdi, E. Suresh, and R. V. Jasra, *J. Mol. Catalysis A: Chemical* 2007, **264**, 162.
13. A. R. Khosropour, M. M. Khodaei, and K. Ghozati, *Russian Journal of Organic Chemistry* 2004, **40**, 1332.
14. M. Moghadam, S. Tangestaninejad, V. Mirkhani, I. Mohammadpoor-Baltork, S. Gorjipoor, and P. Yazdani, *Synth. Comm.* 2009, **39**, 552.
15. N. Atsushi, S. Fumie and N. Masako, *Tetrahedron:Asymmetry* 2000, **11**, 3789.
16. R. E. Banks, M. K. Besheesh, S. N. M. Khaffaf and I. Sharif, *J. Chem. Soc., Perkin Trans. 1*, **1996**, 2069.

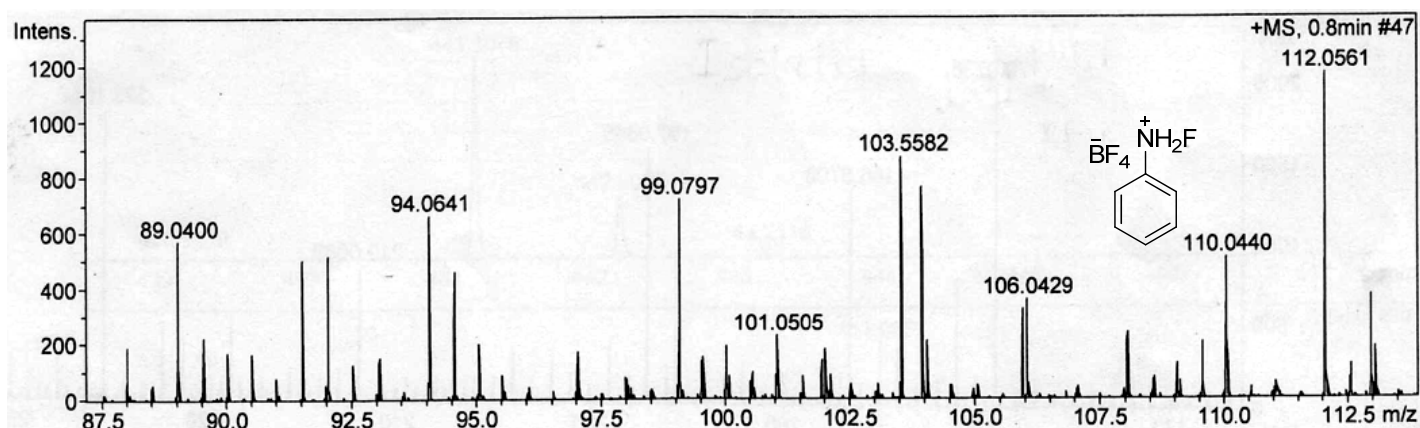

**Figure 3.** HRMS of N-Fluorobenzenaminium tetrafluoroborate

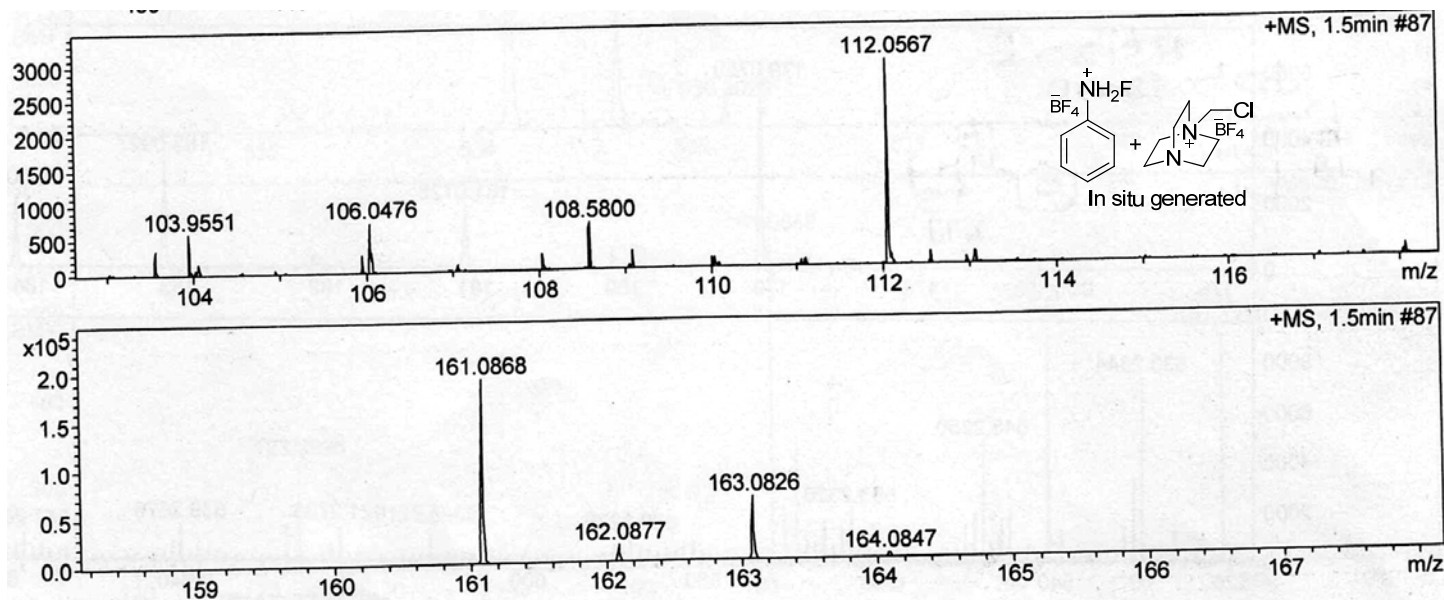

**Figure 3.** HRMS of in situ generated N-Fluorobenzenaminium tetrafluoroborate

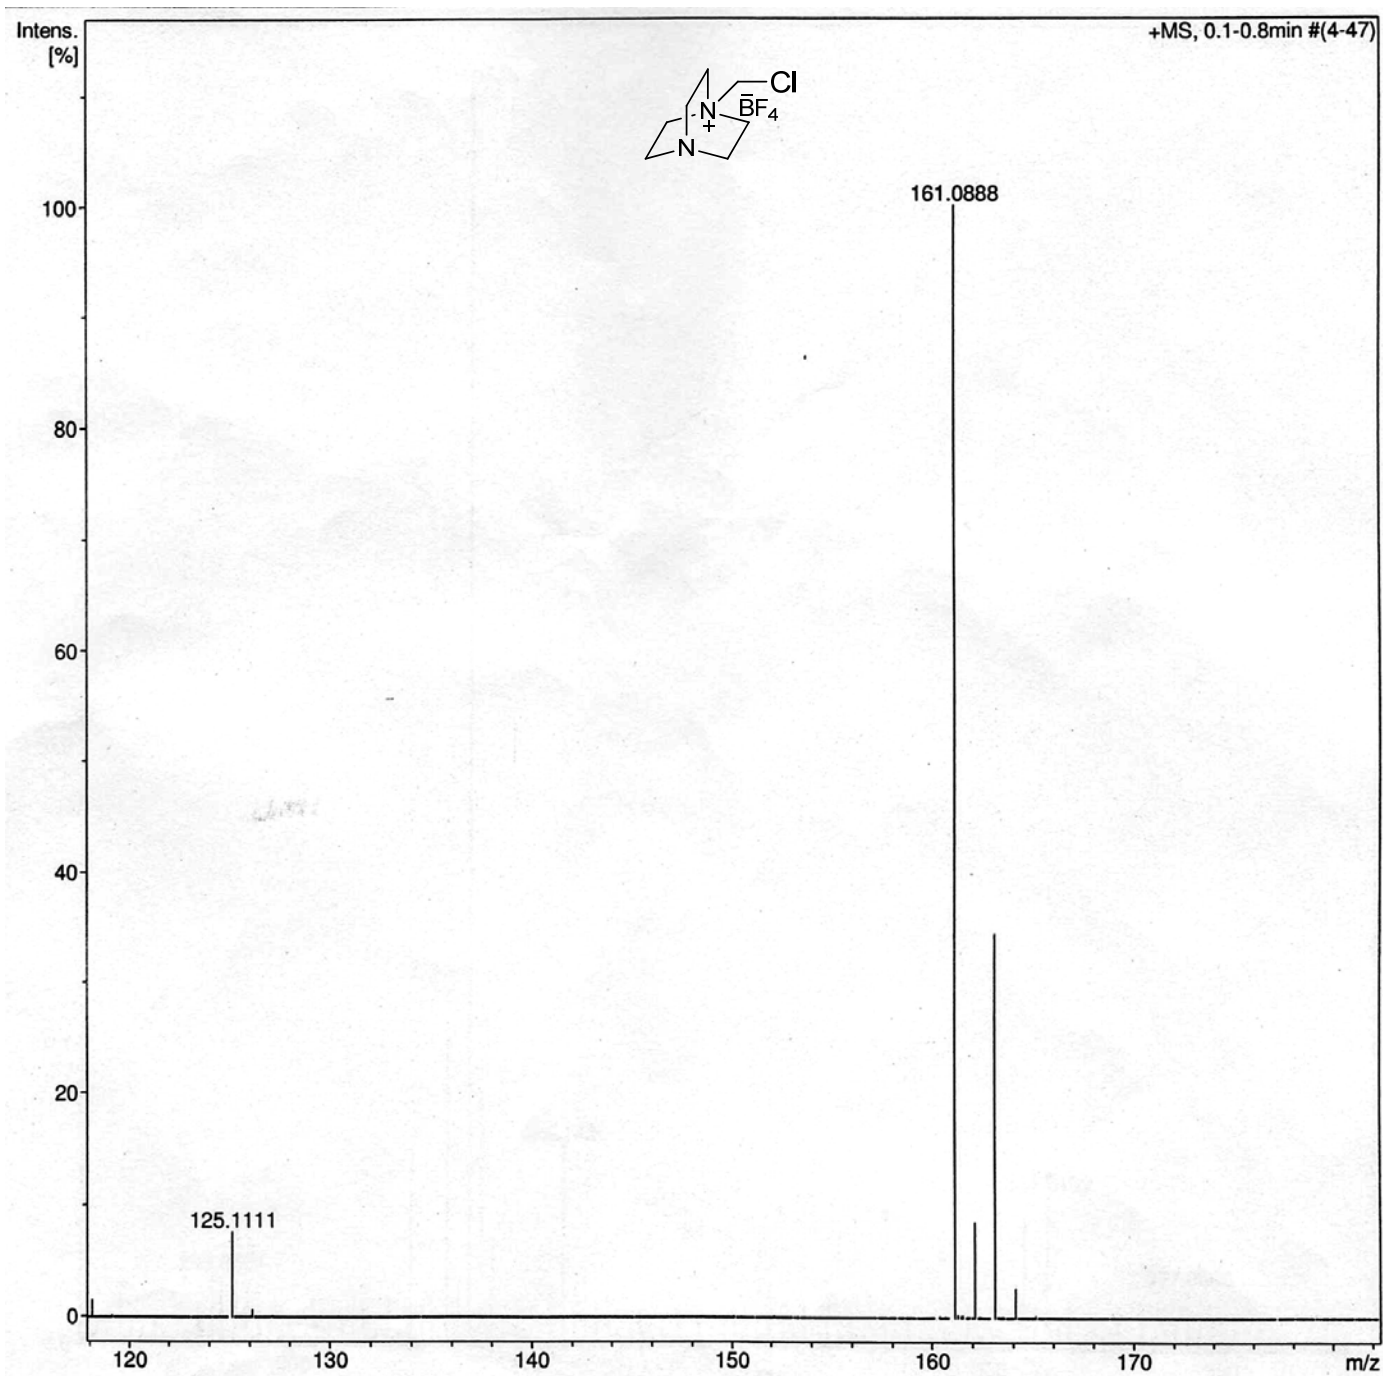

**Figure 4.** HRMS of 1-(chloromethyl)-1,4-diazabicyclo[2.2.2]octan-1-ium chloride with tetrafluoroborate

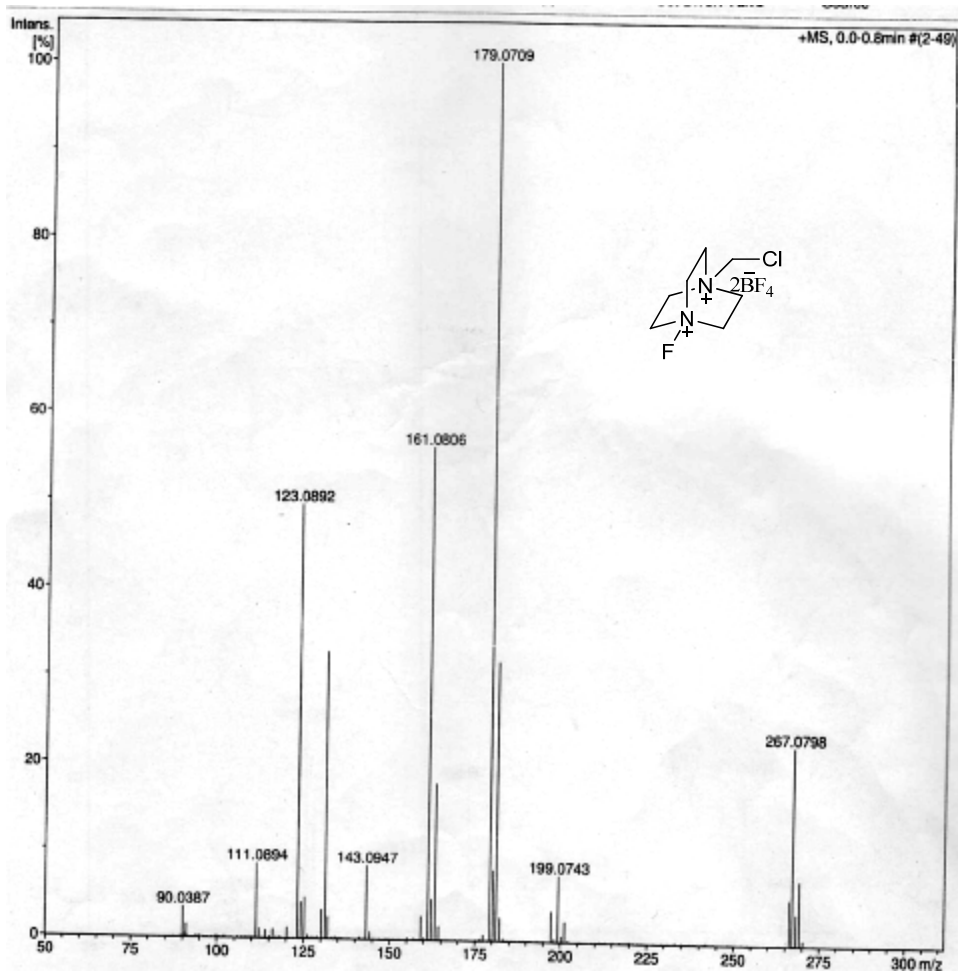

Figure 5. HRMS of Selectfluor

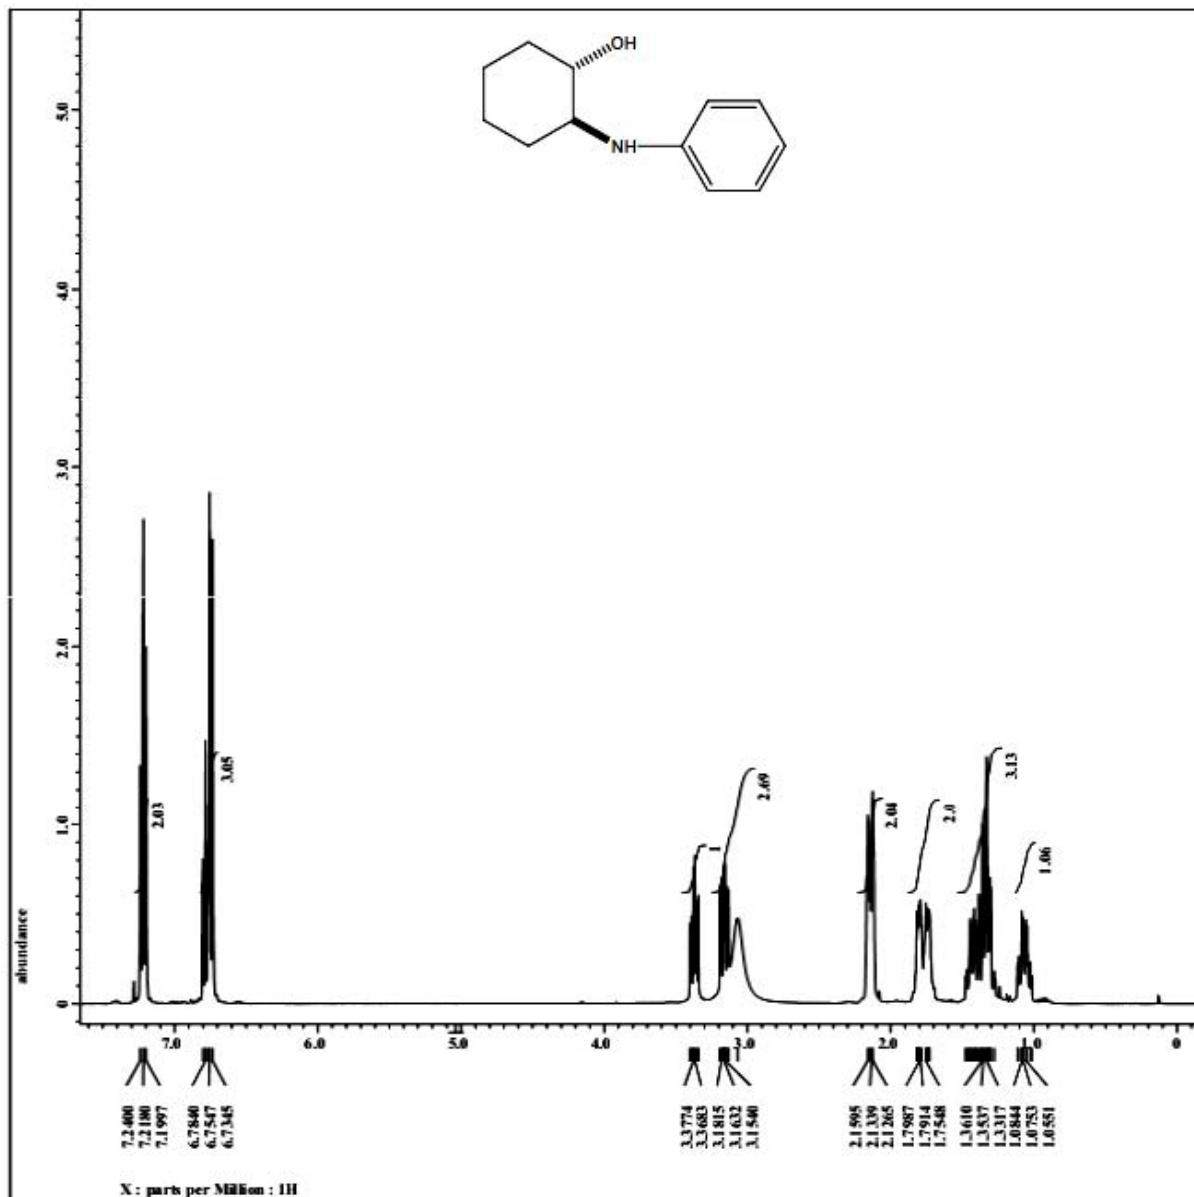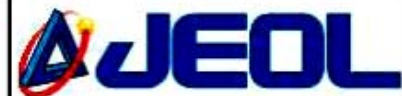

Filename = SS 4-03\_PROTON-4.jdf  
 Author = delta  
 Experiment = single pulse.ex2  
 Sample id = SS 4-03  
 Solvent = CHLOROFORM-D  
 Creation time = 28-JUL-2012 13:08:29  
 Revision time = 4-AUG-2012 11:05:03  
 Current time = 4-AUG-2012 11:05:24

Comment = SS 4-03  
 Data format = 1D COMPLEX  
 Dim size = 13107  
 Dim title = 1H  
 Dim units = [ppm]  
 Dimensions = X  
 Site = ECK 400P  
 Spectrometer = DELTA2 NMR

Field strength = 9.389766[T] (400[MHz])  
 X\_acq\_duration = 1.36577024[s]  
 X\_domain = 1H  
 X\_freq = 399.78219838[MHz]  
 X\_offset = 5[ppm]  
 X\_points = 16384  
 X\_prescans = 1  
 X\_resolution = 0.73218757[Hz]  
 X\_sweep = 11.99616123[kHz]  
 IRR\_domain = 1H  
 IRR\_freq = 399.78219838[MHz]  
 IRR\_offset = 5[ppm]  
 TRI\_domain = 1H  
 TRI\_freq = 399.78219838[MHz]  
 TRI\_offset = 5[ppm]  
 Clipped = FALSE  
 Mod\_return = 1  
 Scans = 16  
 Total\_scans = 16

X\_90\_width = 11.57[us]  
 X\_acq\_time = 1.36577024[s]  
 X\_angle = 45[deg]  
 X\_atn = 5[dB]  
 X\_pulse = 5.785[us]  
 IRR\_mode = Off  
 TRI\_mode = Off  
 Delta\_preset = FALSE  
 Initial\_wait = 1[s]  
 Recvr\_gain = 24  
 Relaxation\_delay = 4[s]  
 Repetition\_time = 5.36577024[s]  
 Temp\_get\_time = 20.3[dC]

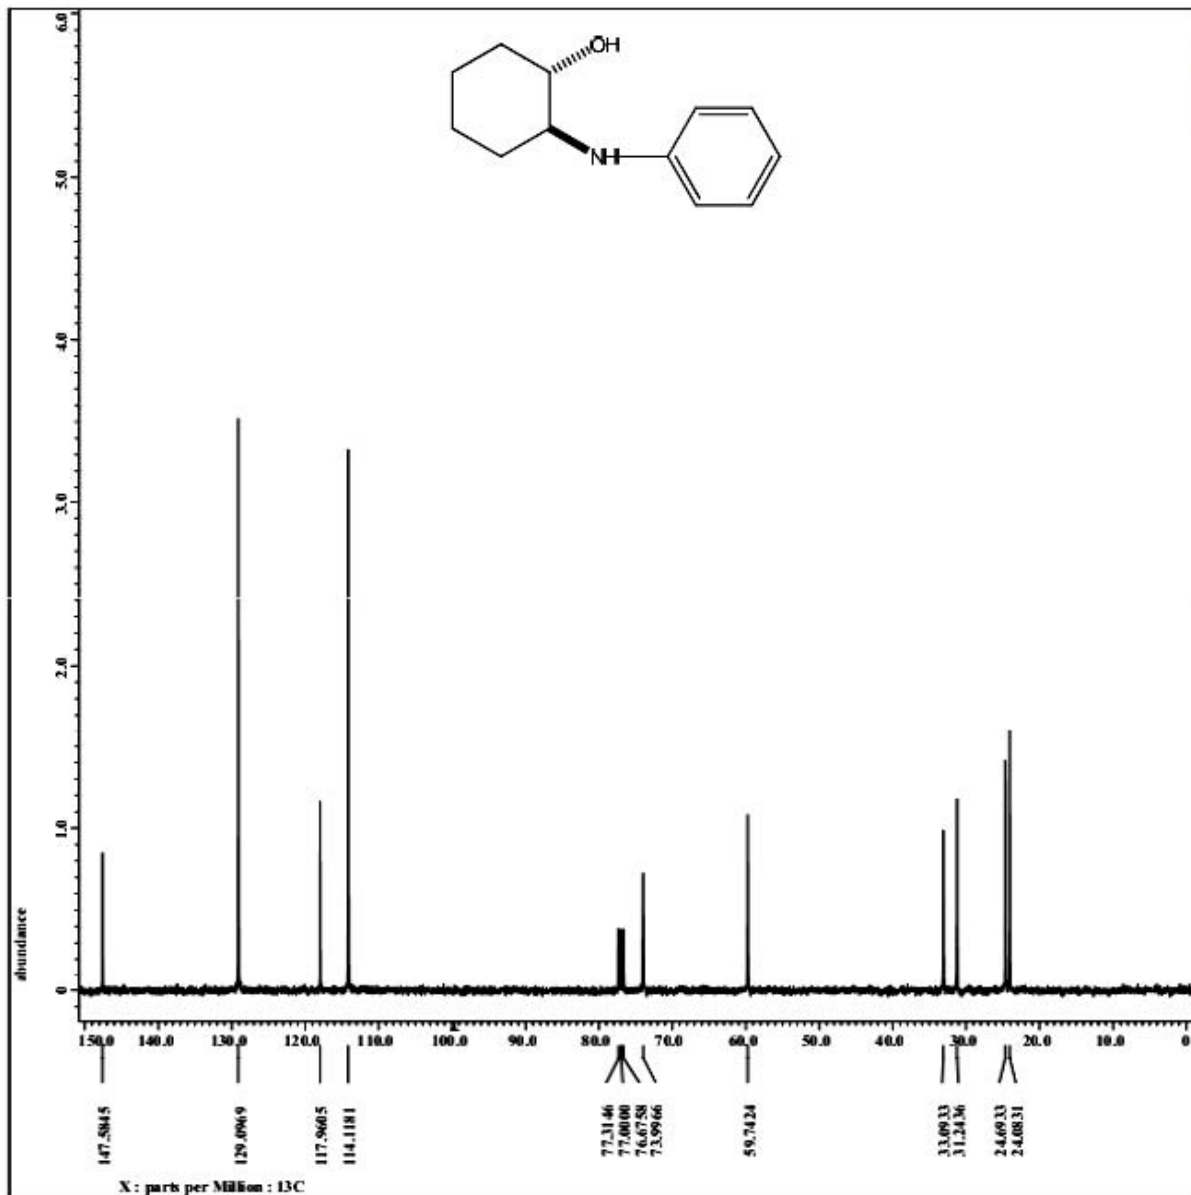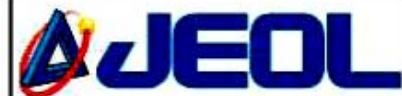

```

Filename      = SS 4-03_CARBON-3.jdf
Author       = delta
Experiment   = single_pulse_dec
Sample_id    = SS 4-03
Solvent      = CHLOROFORM-D
Creation_time = 1-AUG-2012 21:41:04
Revision_time = 1-AUG-2012 22:01:33
Current_time  = 4-AUG-2012 11:07:09

Comment      = SS 4-03
Data format  = 1D COMPLEX
Dim_size     = 26214
Dim_title    = 13C
Dim_units    = [ppm]
Dimensions   = X
Site         = ECK 400P
Spectrometer = DELTA2 NMR

Field strength = 9.389766[T] (400[MHz])
X_acq_duration = 1.0433312[s]
X_domain      = 13C
X_freq       = 100.52530333[MHz]
X_offset     = 100[ppm]
X_points     = 32768
X_prescans   = 4
X_resolution = 0.95846665[Hz]
X_sweep      = 31.40703518[kHz]
Irr_domain   = 1H
Irr_freq     = 399.78219838[MHz]
Irr_offset   = 5[ppm]
Clipped      = FALSE
Mod_return   = 1
Scafs        = 14
Total_scans  = 14

X_90_width   = 11.75[us]
X_acq_time   = 1.0433312[s]
X_angle      = 30[deg]
X_atn        = 10[dB]
X_pulse      = 3.91666667[us]
Irr_atn_dec  = 24.95[dB]
Irr_atn_noe  = 24.95[dB]
Irr_noise    = WALTZ
Decoupling   = TRUE
Initial_wait = 1[s]
Noe          = TRUE
Noe_time     = 2[s]
RecVr_gain   = 56
Relaxation_delay = 2[s]
Repetition_time = 3.0433312[s]
Temp_get     = 19.6[degC]
  
```



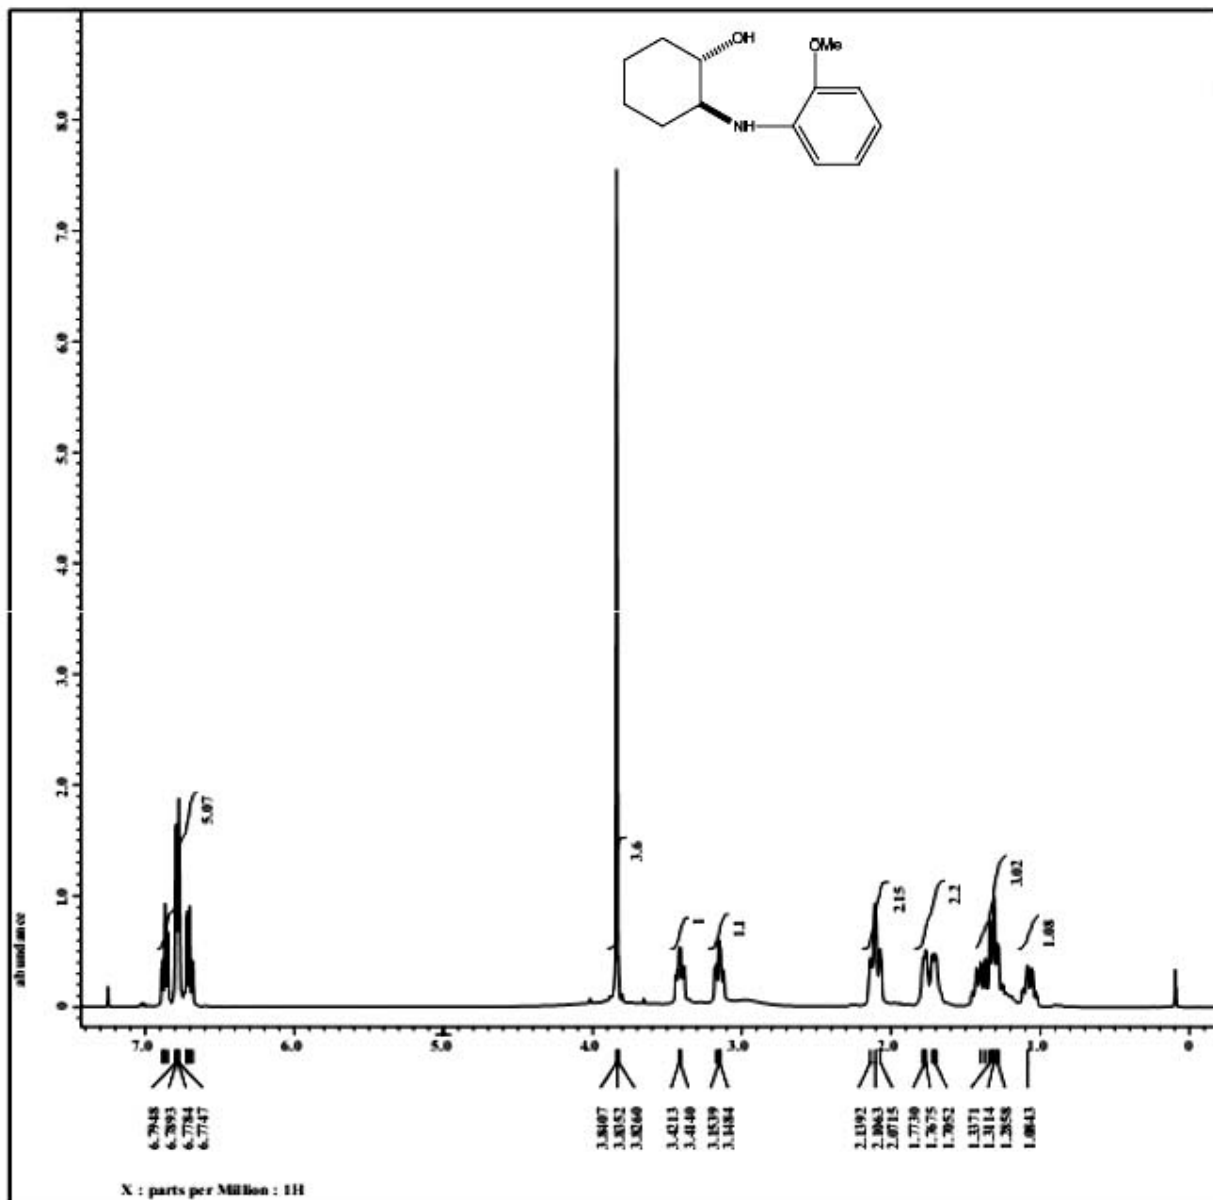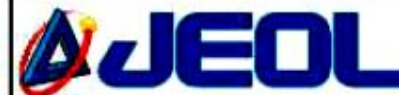

Filename = SS 3-200ME\_PROTON-4.)  
 Author = delta  
 Experiment = single\_pulse.ex2  
 Sample\_id = SS 3-200ME  
 Solvent = CDCl3  
 Creation\_time = 30-NOV-2011 11:28:42  
 Revision\_time = 29-JUL-2012 16:16:13  
 Current\_time = 29-JUL-2012 16:16:35

Comment = SS 3-200ME  
 Data\_format = 1D\_COMPLEX  
 Dir\_size = 13107  
 Dir\_title = 1H  
 Dir\_units = [ppm]  
 Dimensions = X  
 Site = KCK 400P  
 Spectrometer = DELTA2\_MMR

Field\_strength = 9.389766[7] [400(MHz)]  
 X\_acq\_duration = 1.36577024[s]  
 X\_domain = 1H  
 X\_freq = 399.78219838(MHz)  
 X\_offset = 5[ppm]  
 X\_points = 16384  
 X\_prescans = 1  
 X\_resolution = 0.73218757[Hz]  
 X\_sweep = 11.99616123[kHz]  
 Iir\_domain = 1H  
 Iir\_freq = 399.78219838(MHz)  
 Iir\_offset = 5[ppm]  
 Tri\_domain = 1H  
 Tri\_freq = 399.78219838(MHz)  
 Tri\_offset = 5[ppm]  
 Clipped = FALSE  
 Mod\_return = 1  
 Scans = 16  
 Total\_scans = 16  
 X\_90\_width = 11.57[us]  
 X\_acq\_time = 1.36577024[s]  
 X\_angle = 45[deg]  
 X\_atn = 5[dB]  
 X\_pulse = 5.785[us]  
 Iir\_mode = Off  
 Tri\_mode = Off  
 Data\_preset = FALSE  
 Initial\_wait = 1[s]  
 Recvr\_gain = 24  
 Relaxation\_delay = 4[s]  
 Repetition\_time = 5.36577024[s]  
 Temp\_get = 21.5[degC]

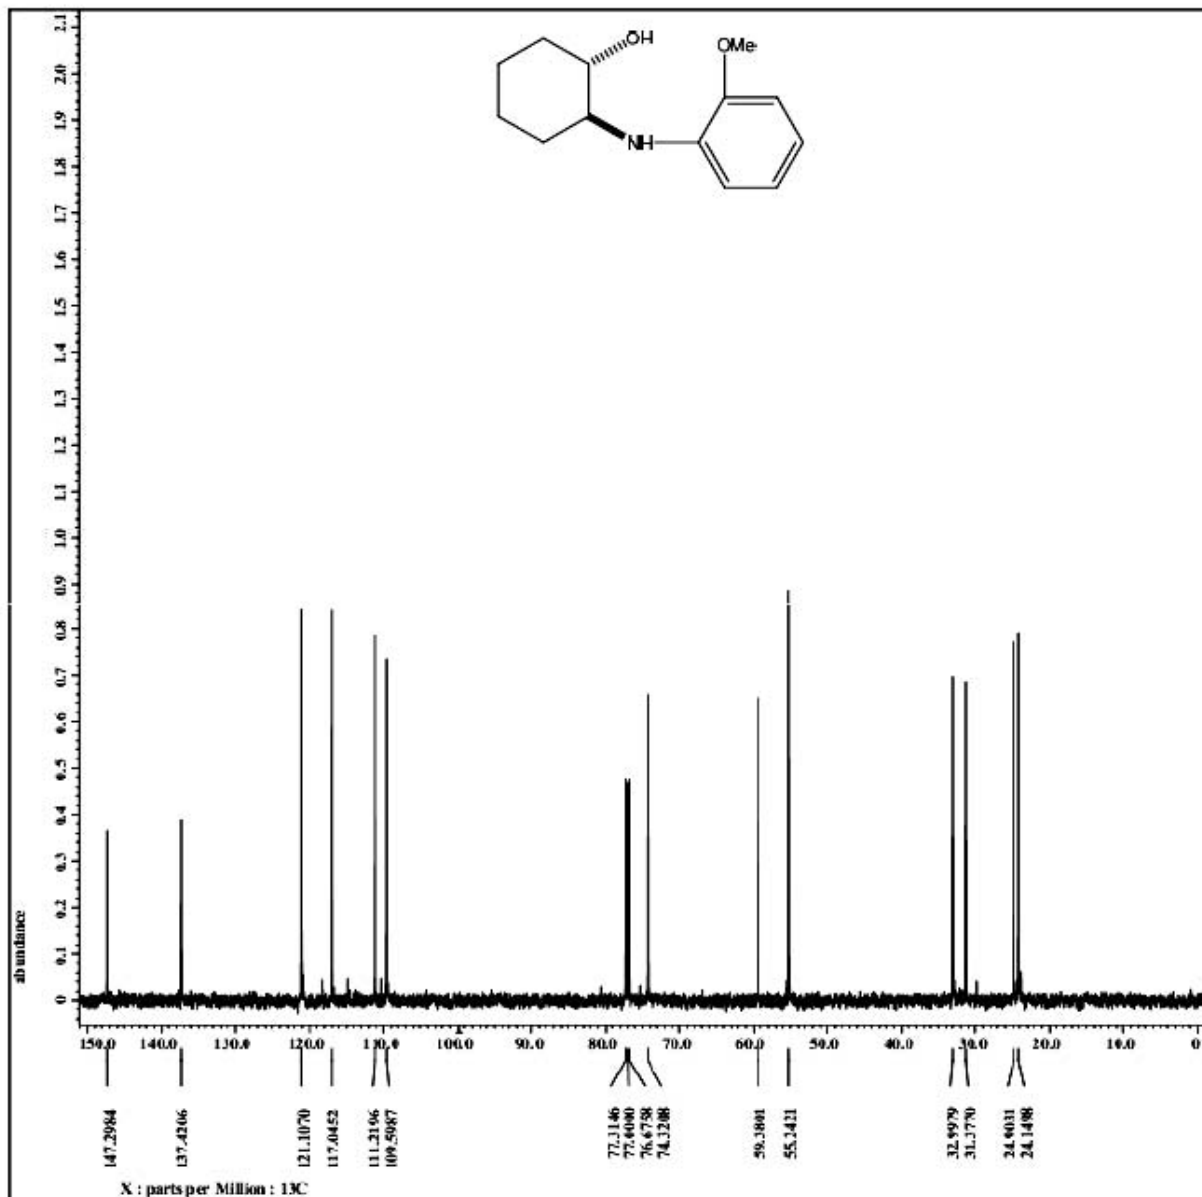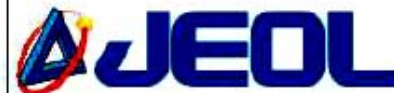

Filename = SS 3-200ME\_CARBON-3.j  
 Author = delta  
 Experiment = single pulse dec  
 Sample id = SS 3-200ME  
 Solvent = CHLOROFORM-D  
 Creation time = 9-DEC-2011 17:16:28  
 Revision time = 9-DEC-2011 17:19:43  
 Current time = 29-JUL-2012 16:17:21

Comment = SS 3-200ME  
 Data format = 1D COMPLEX  
 File Size = 26214  
 File title = 13C  
 File units = [ppm]  
 Dimensions = X  
 Site = BCK 400P  
 Spectrometer = DELTA2 MMH

Field strength = 9.389766(T) (400(MHz))  
 X\_acq duration = 1.0433312 (s)  
 X\_domain = 13C  
 X\_freq = 100.52530333 (MHz)  
 X\_offset = 100 (ppm)  
 X\_points = 32768  
 X\_prescans = 4  
 X\_resolution = 0.95846665 (Hz)  
 X\_sweep = 31.40703518 (kHz)  
 Iir\_domain = 1H  
 Iir\_freq = 399.78219838 (MHz)  
 Iir\_offset = 5 (ppm)  
 Clipped = FALSE  
 No. scans = 21  
 Total scans = 21

X\_90 width = 11.75 (us)  
 X\_acq time = 1.0433312 (s)  
 X\_angle = 30 (deg)  
 X\_atn = 10 (dB)  
 X\_pulse = 3.91666667 (us)  
 Iir\_atn\_dec = 24.95 (dB)  
 Iir\_atn\_noe = 24.95 (dB)  
 Iir\_noise = WALTZ  
 Decoupling = TRUE  
 Initial wait = 1 (s)  
 Noe = TRUE  
 Noe time = 2 (s)  
 Recvr gain = 54  
 Relaxation delay = 2 (s)  
 Repetition time = 3.0433312 (s)  
 Temp\_get = 23.2 (deg)

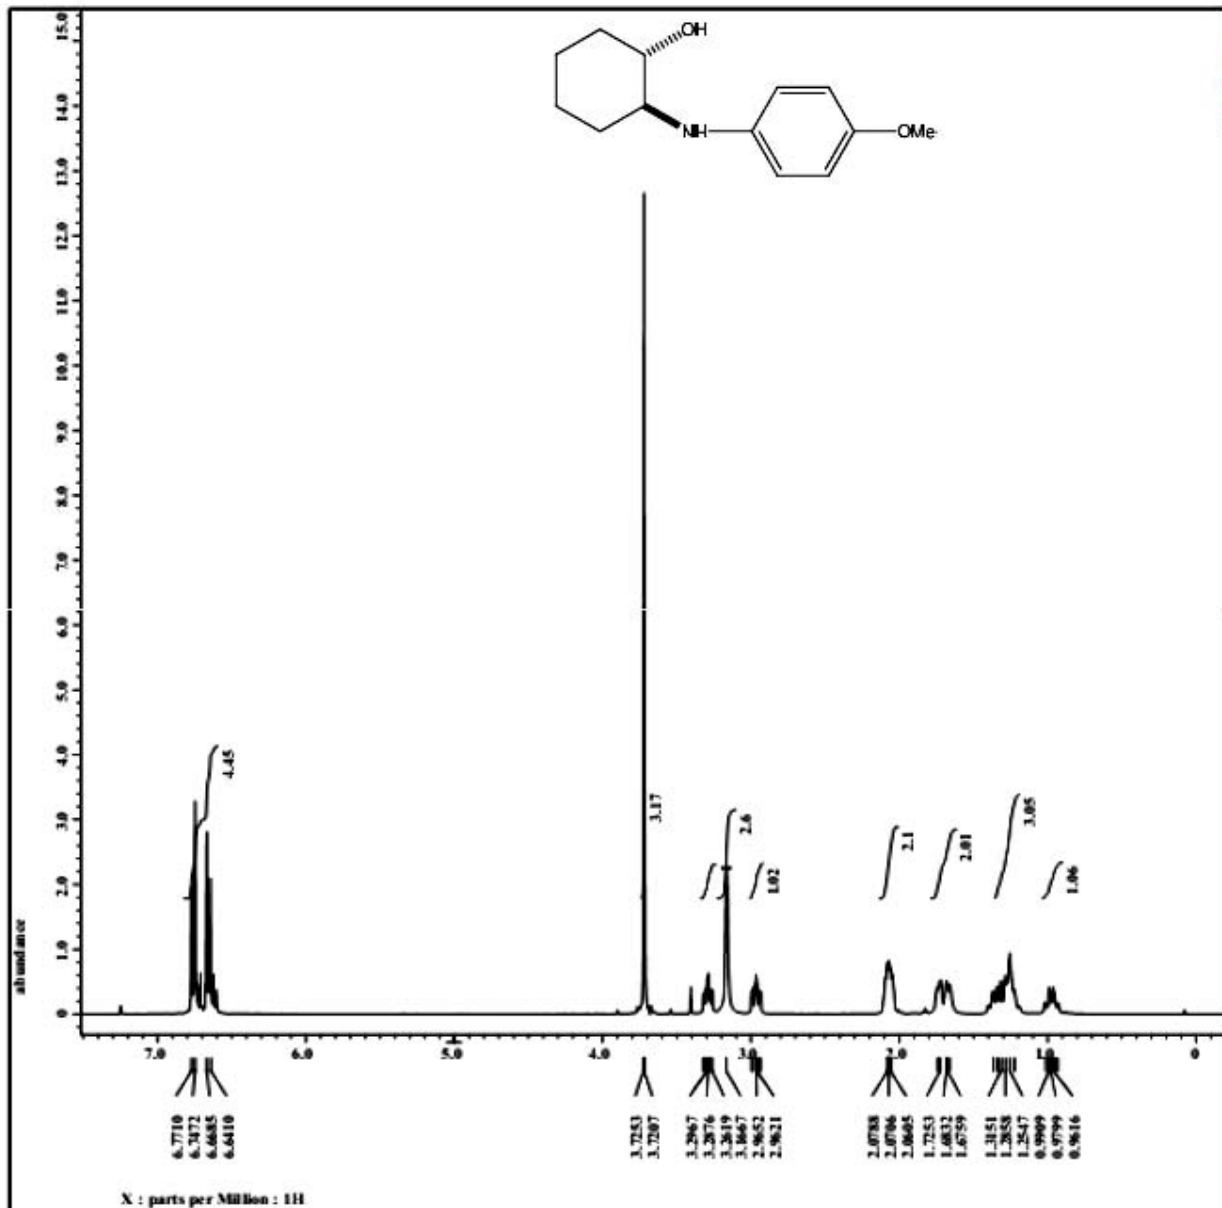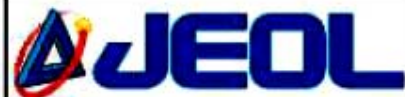

```

Filename      = SS 3-2FORME_PROTON-5.j
Author       = delta
Experiment   = single pulse .ax2
Sample_id    = SS 3-2FORME
Solvent      = CHLOROFORM-D
Creation_time = 29-NOV-2011 09:58:54
Revision_time = 29-JUL-2012 16:22:23
Current_Time = 29-JUL-2012 16:22:41

Comment      = SS 3-2FORME
Data_format  = 1D COMPLEX
Data_size    = 13107
Dir_title    = 1H
Dir_units    = [ppm]
Dimensions   = X
Site         = KCM 400P
Spectrometer = DELTA2_MMR

Field_strength = 9.389766[T] [400[Mhz]]
X_acq_duration = 1.36577024[s]
X_domain       = 1H
X_freq         = 399.78219838[Mhz]
X_offset      = 5[ppm]
X_points       = 16384
X_prescans    = 1
X_resolution   = 0.73218757[Mz]
X_sweep       = 11.99616123[kHz]
Irr_domain    = 1H
Irr_freq      = 399.78219838[Mhz]
Irr_offset    = 5[ppm]
Tri_domain    = 1H
Tri_freq      = 399.78219838[Mhz]
Tri_offset    = 5[ppm]
Clipped       = FALSE
Mod_return    = 1
Scans         = 16
Total_scans   = 16

X_90_width    = 11.57[us]
X_acq_time     = 1.36577024[s]
X_angle        = 45[deg]
X_atn          = 5[db]
X_pulse        = 5.785[us]
Irr_mode       = Off
Dante_preset  = FALSE
Init_wait     = 1[s]
Nucv_gain      = 22
Relaxation_delay = 4[s]
Repetition_time = 5.36577024[s]
Temp_get       = 22.2[dc]
  
```

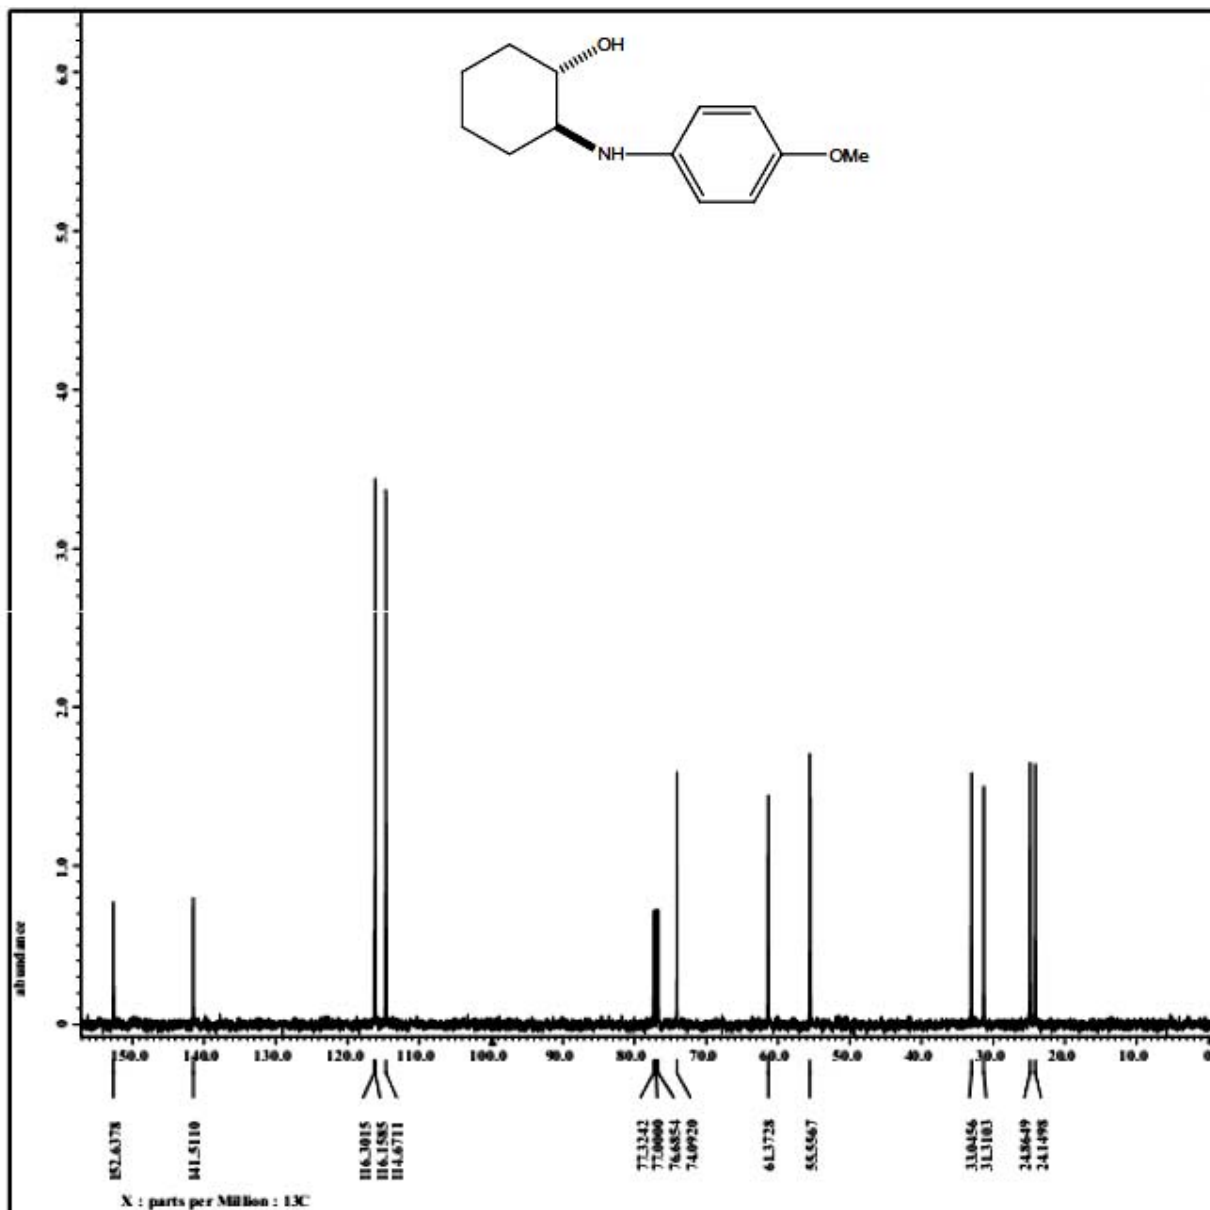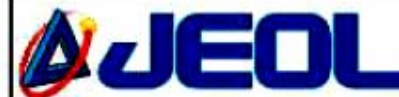

```

Filename      = SS 3-2FORME_CARBON-3.j
Author        = delta
Experiment    = single pulse dec
Sample_id     = SS 3-2FORME
Solvent       = CHLOROFORM-D
Creation_time = 30-NOV-2011 20:32:02
Revision_time = 30-NOV-2011 20:35:31
Current_Time  = 29-JUL-2012 16:23:21

Comment       = SS 3-2FORME
Data_format   = 1D COMPLEX
Dir_size      = 26214
Dir_title     = 13C
Dir_units     = [ppm]
Dimensions    = X
Site          = KCK 400P
Spectrometer  = DELTA2_MMR

Field_strength = 9.389766[T] [400[MHz]]
X_acq_duration = 1.04333312[s]
X_domain       = 13C
X_freq         = 100.52530333 [MHz]
X_offset       = 100 [ppm]
X_points       = 32768
X_prescans     = 4
X_resolution   = 0.95846665 [kHz]
X_sweep        = 31.40703518 [kHz]
Irr_domain     = 1H
Irr_freq       = 399.78219838 [MHz]
Irr_offset     = 5 [ppm]
Clipped        = FALSE
Mod_Acquisition = -
Scale          = 14
Total_scans    = 14

X_90_width     = 11.75 [us]
X_acq_time     = 1.04333312 [s]
X_angle         = 30 [deg]
X_atn           = 10 [dB]
X_pulse        = 3.91666667 [us]
Irr_atn_dec    = 24.95 [dB]
Irr_atn_now    = 24.95 [dB]
Irr_noise      = WALTZ
Decoupling     = FMR
Initial_wait   = 1 [s]
New_time       = 2 [s]
Recvr_gain     = 60
Relaxation_delay = 2 [s]
Repetition_time = 3.04333312 [s]
Temp_get       = 22.8 [dC]
  
```

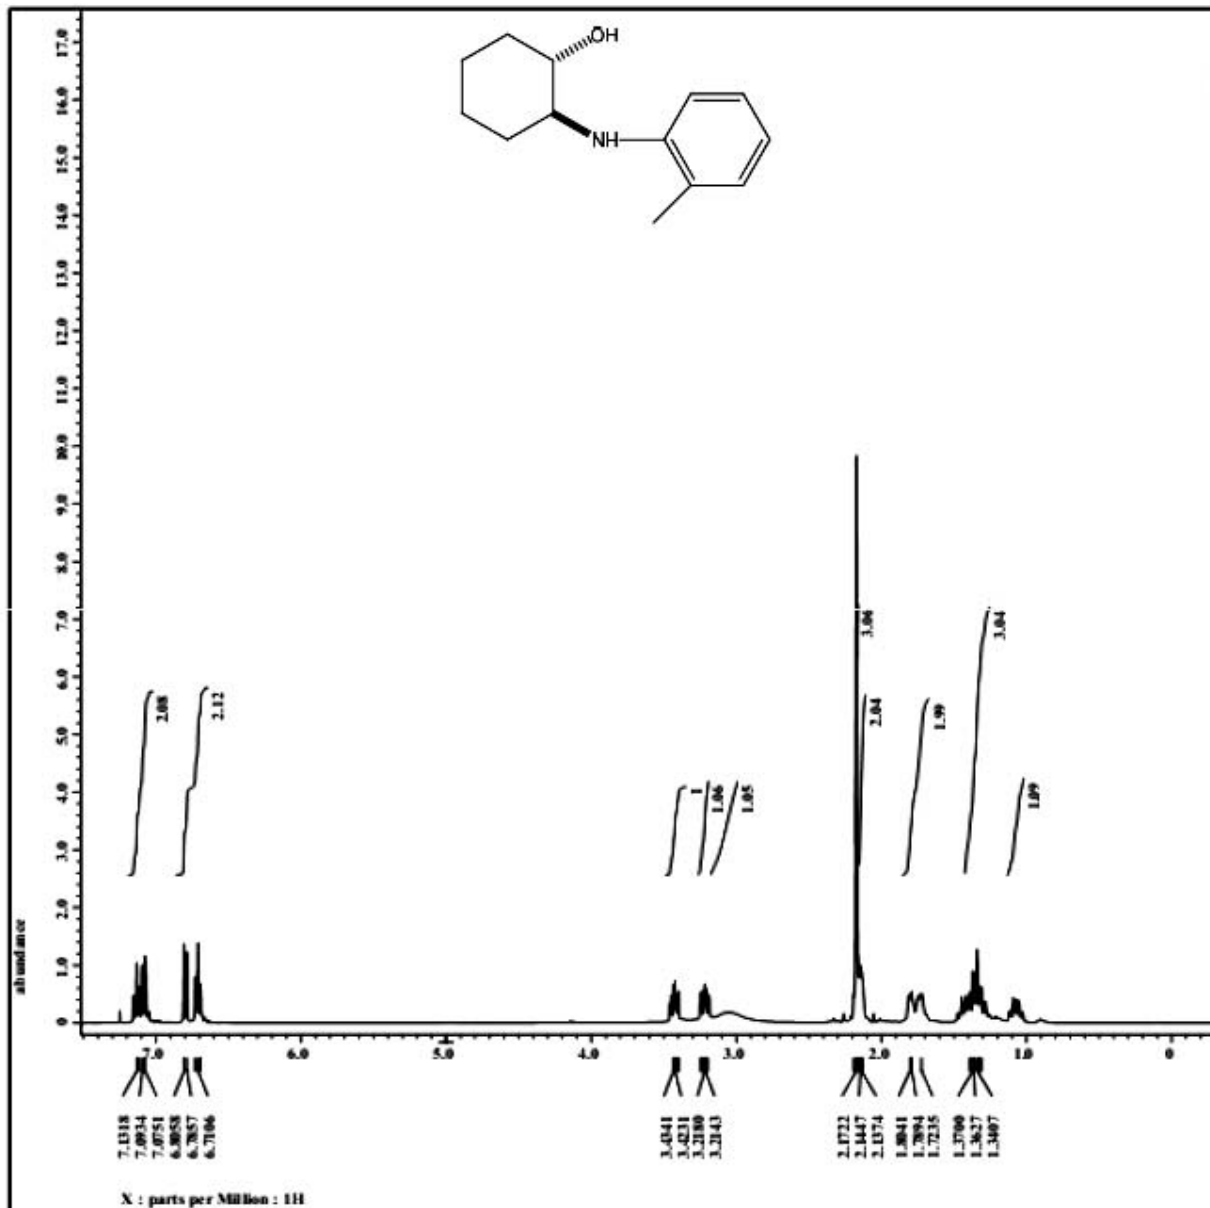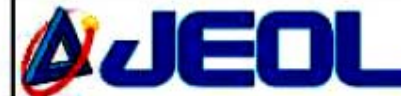

```

Filename      = SS 3-730Z_PROTON-4.jd
Author        = delta
Experiment    = single_pulse_ax2
Sample_id     = SS 3-730Z
Solvent       = CHLOROFORM-D
Creation_time  = 4-MAY-2012 12:05:50
Revision_time = 29-JUL-2012 16:29:44
Current_Time  = 29-JUL-2012 16:29:53

Comment       = SS 3-730Z
Data_format   = 1D COMPLEX
Dir_size      = 13107
Dir_title     = 1H
Dir_units     = [ppm]
Dimensions    = X
Site          = KCM 400P
Spectrometer  = DELTA2_MMR

Field_strength = 9.389766[T] [400[Mhz]]
X_acq_duration = 1.36577024[s]
X_domain       = 1H
X_freq         = 399.78219838[Mhz]
X_offset       = 5[ppm]
X_points       = 16384
X_prescans     = 1
X_resolution   = 0.73218757[Hz]
X_sweep        = 11.99616123[kHz]
Irr_domain     = 1H
Irr_freq       = 399.78219838[Mhz]
Irr_offset     = 5[ppm]
Tri_domain     = 1H
Tri_freq       = 399.78219838[Mhz]
Tri_offset     = 5[ppm]
Clipped        = FALSE
Mod_return     = 1
Scans          = 16
Total_scans    = 16

X_90_width     = 11.57[us]
X_acq_time     = 1.36577024[s]
X_angle        = 45[deg]
X_atn          = 5[db]
X_pulse        = 5.785[us]
Irr_mode       = Off
Tri_mode       = Off
Dante_preset   = FALSE
Init_wait      = 1[s]
Recvr_gain     = 26
Relaxation_delay = 4[s]
Repetition_time = 5.36577024[s]
Temp_get       = 22.3[dc]
  
```

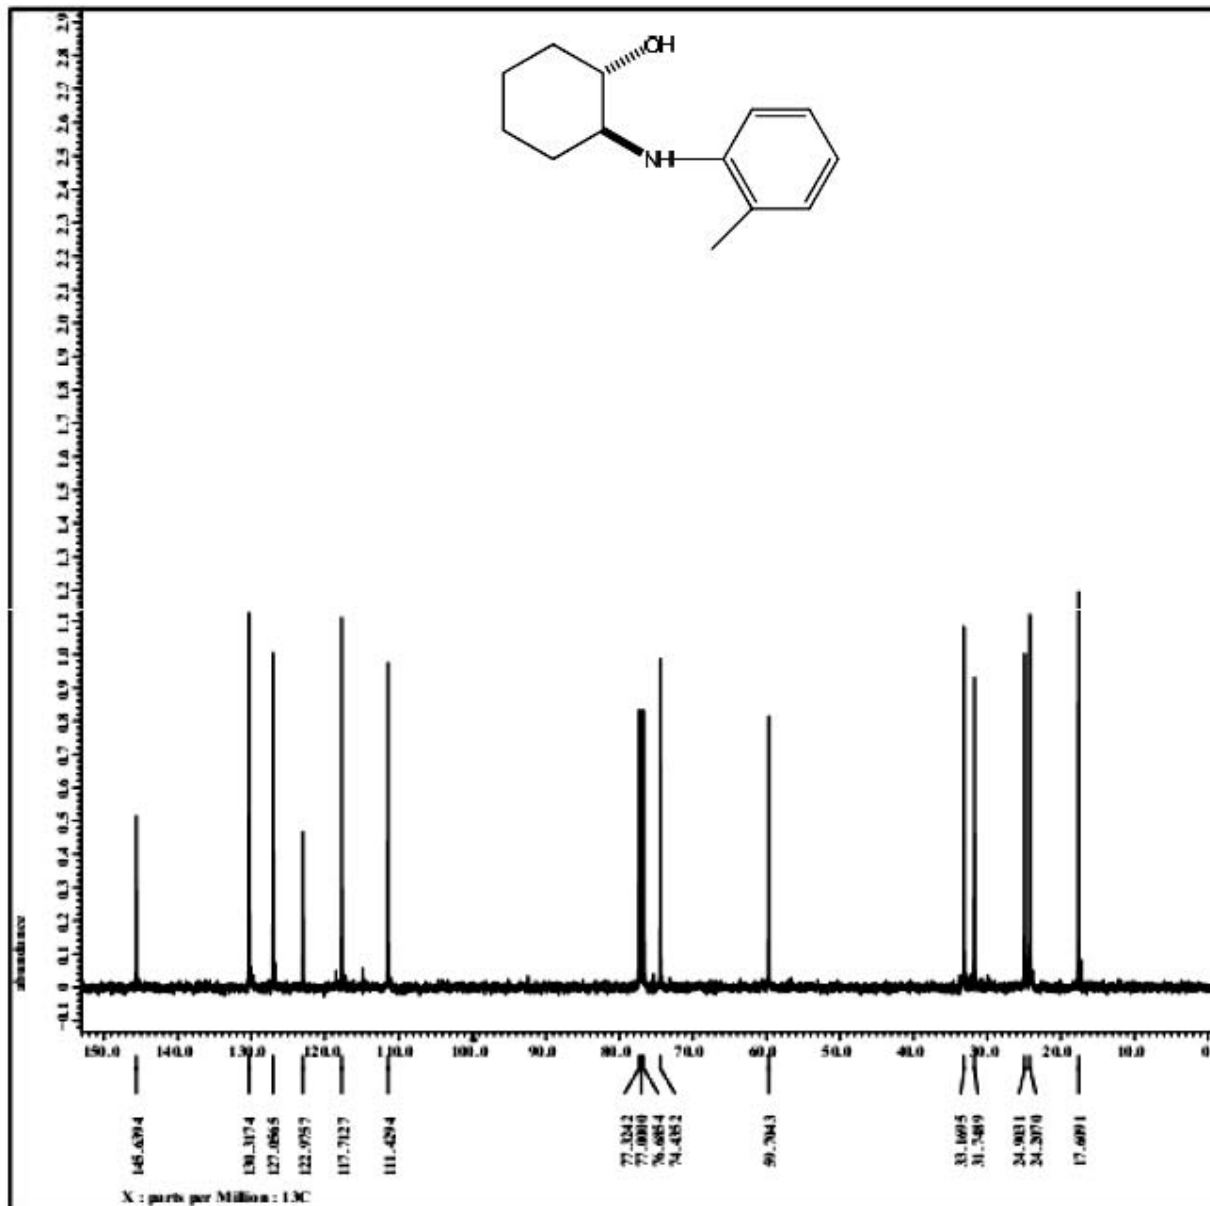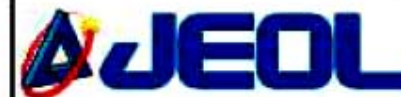

```

Filename      = SS 3-7307_CARBON-3.jc
Author        = deTia
Experiment    = single_pulse_dec
Sample_id     = SS 3-7307
Solvent       = CHLOROFORM-D
Creation_time  = 7-MAY-2012 20:08:57
Revision_time = 7-MAY-2012 20:23:00
Current_time  = 29-JUL-2012 18:30:34

Comment       = SS 3-7307
Data_format   = ID COMPLEX
Dir_name      = 28214
Dir_title     = 13C
Dir_units     = [ppm]
Dimensions    = X
Site          = NEX 400P
Spectrometer  = DELTA2_MMR

Field_strength = 9.389766[T] (400[MHz])
X_acq_duration = 1.04333312[s]
X_domain       = 13C
X_freq         = 100.62530333[MHz]
X_offset       = 100[ppm]
X_points       = 32768
X_prescans     = 4
X_resolution   = 0.25846665[Hz]
X_sweep        = 11.40702018[kHz]
Irr_domain     = 1H
Irr_freq       = 399.78219838[MHz]
Irr_offset     = 0[ppm]
Clipped        = ALL32
-----
Scans          = 78
Total_scans    = 78

X_90_width     = 11.75[us]
X_acq_time     = 1.04333312[s]
X_angle        = 30[deg]
X_atn          = 10[dB]
X_pulse        = 3.91666667[us]
Irr_atn_dec    = 24.95[dB]
Irr_atn_noe    = 24.95[dB]
Irr_noise      = 98.172
Decoupling     = THCE
Initial_wait    = 1[s]
Noe            = THCE
Noe_time       = 2[s]
Recvr_gain     = 60
Relaxation_delay = 2[s]
Repetition_time = 1.04333312[s]
Temp_get       = 23.1[degC]
  
```

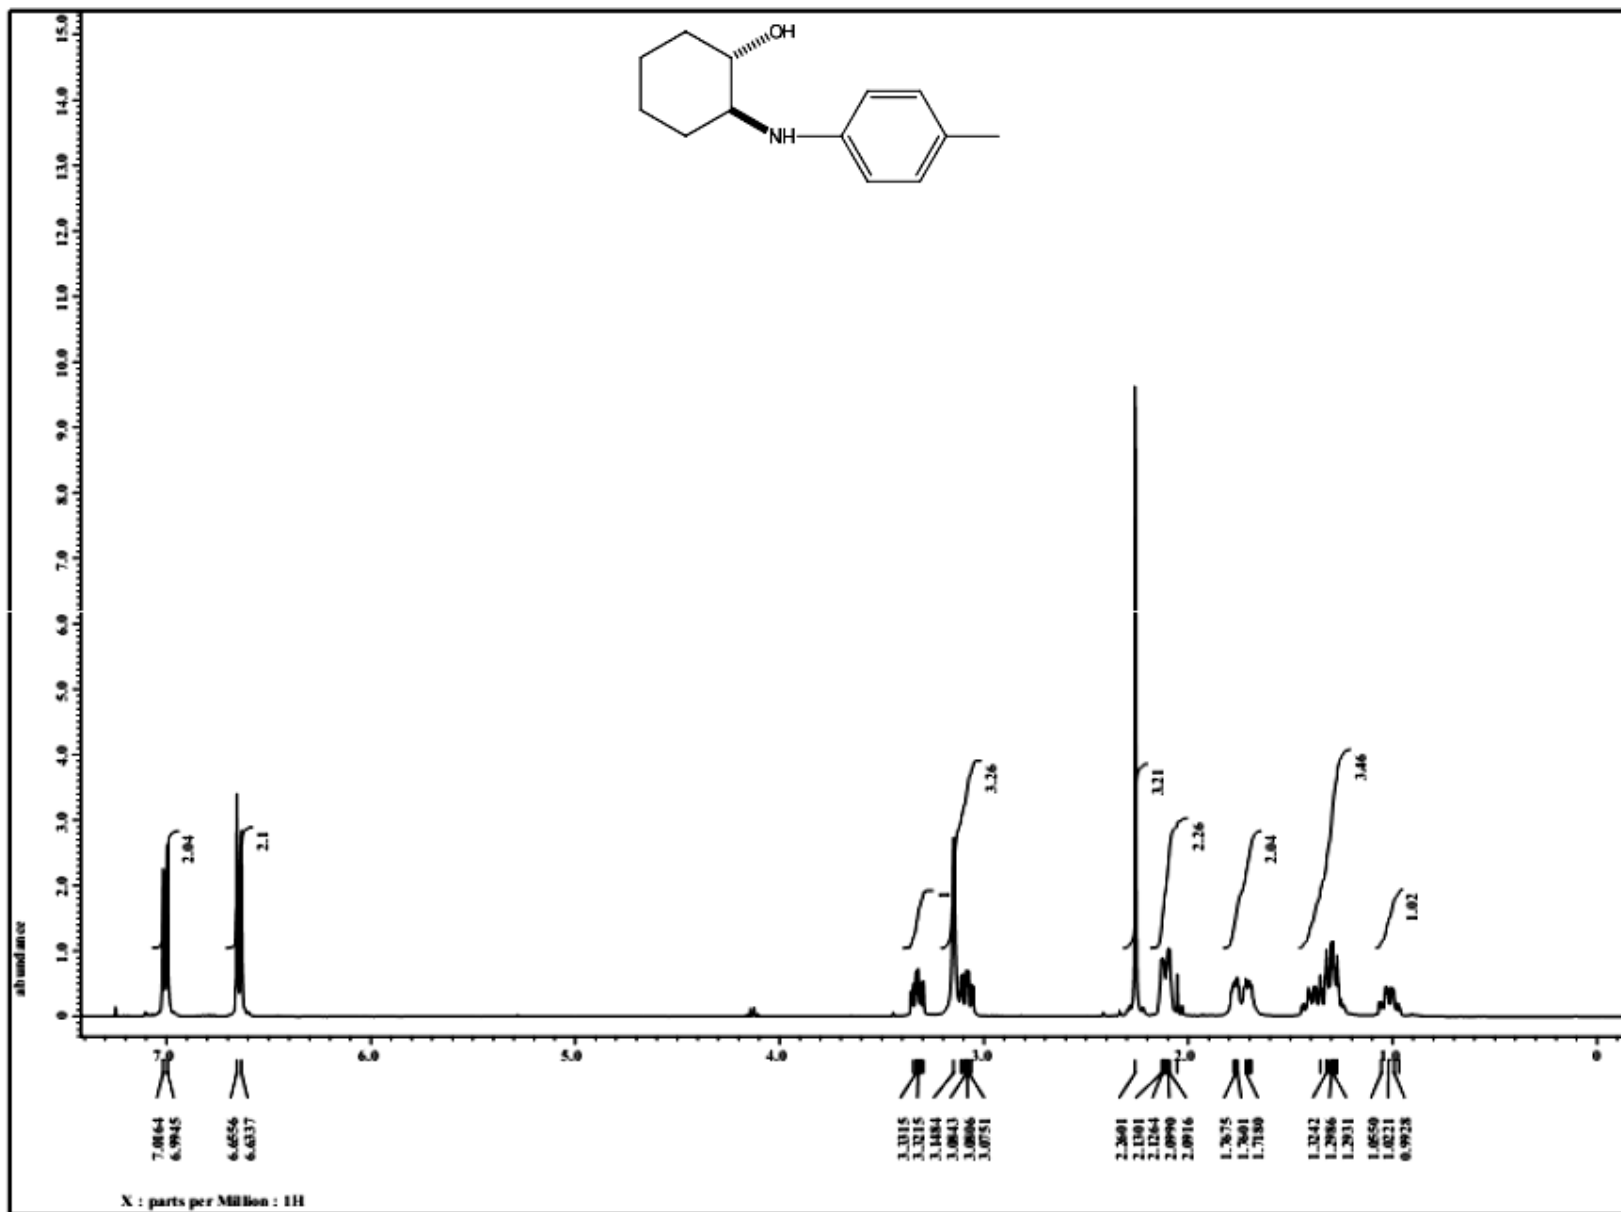

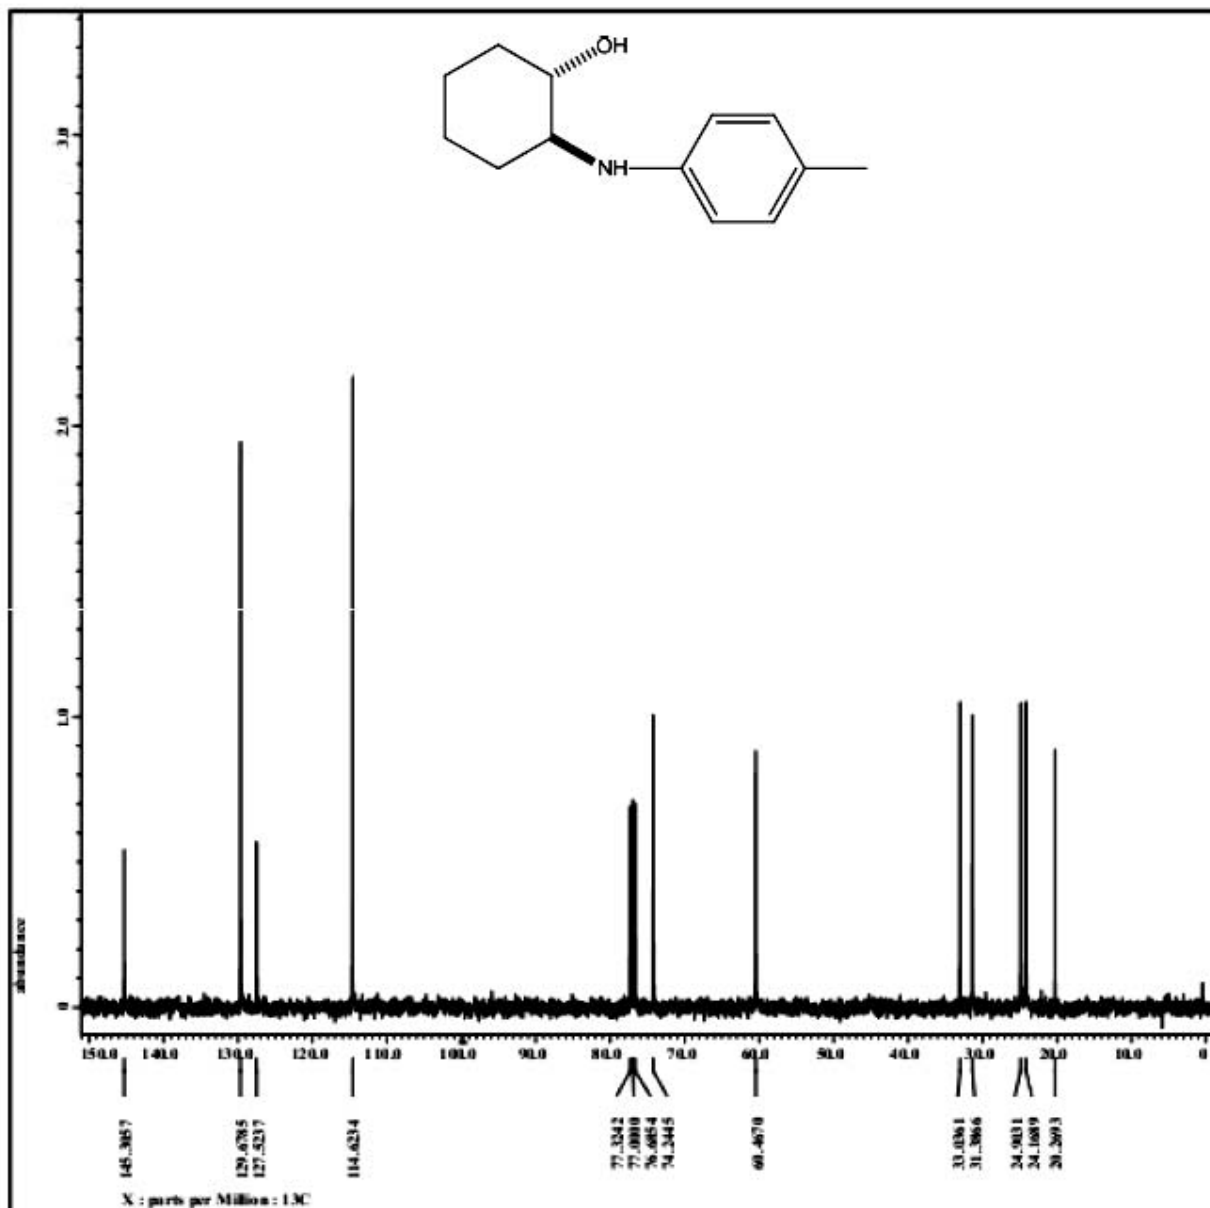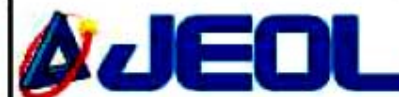

```

Filename      = DE 3-74_PTD_CARBON-1
Author        = deTia
Experiment    = single_pulse_dec
Sample id     = DE 3-74_PTD
Solvent      = CHLOROFORM-D
Creation time = 11-MAY-2012 00:32:03
Revision time = 11-MAY-2012 01:06:03
Current time  = 29-JUL-2012 18:31:40

Comment       = DE 3-74_PTD
Data format   = 1D_COMPLEX
Dir_name      = 28214
Dir_title     = 13C
Dir_units     = (ppm)
Dimensions    = X
Site          = HXK 400P
Spectrometer  = DELTA2_NMR

Field strength = 3.389766(T) (400(MHz))
X_acq_duration = 1.04333312(s)
X_domain       = 13C
X_freq         = 100.52530333(MHz)
X_offset       = 100(ppm)
X_points       = 32768
X_prescans     = 4
X_resolution   = 0.35846665(Hz)
X_sweep        = 11.40702018(kHz)
Irr_domain     = 13C
Irr_freq       = 399.78219838(MHz)
Irr_offset     = 0(ppm)
Clipped        = ALL32
Mod_4turns     = 1
Scale          = 14
Total_scans    = 14

X_90_width     = 11.75(us)
X_acq_time     = 1.04333312(s)
X_angle        = 30(deg)
X_atn          = 10(dB)
X_pulse        = 3.91666667(us)
Irr_atn_dec    = 24.95(dB)
Irr_atn_poc    = 24.95(dB)
Irr_noise      = 98.172
Decoupling     = 1902
Initial_wait   = 1(s)
Noe            = 1902
Noe_time       = 2(s)
RecVr_gain     = 28
Relaxation_delay = 2(s)
Repetition_time = 1.04333312(s)
Temp_get       = 22.9(dC)
  
```



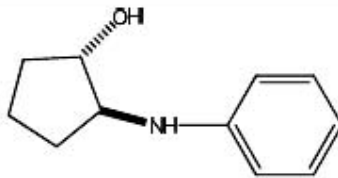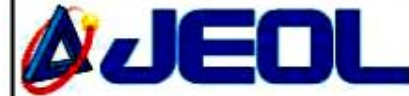

Filename = SS\_AMLCPD\_PROTON-5.jd  
 Author = delta  
 Experiment = single pulse.ex2  
 Sample\_id = SS\_AMLCPD  
 Solvent = CHLOROFORM-D  
 Creation\_time = 20-DEC-2011 12:36:45  
 Revision\_time = 29-JUL-2012 16:48:05  
 Current\_time = 29-JUL-2012 16:48:19

Comment = SS\_AMLCPD  
 Data\_format = 1D\_COMPLEX  
 Dim\_size = 13107  
 Dim\_title = 1H  
 Dim\_units = [ppm]  
 Dimensions = X  
 Site = ECK 400P  
 Spectrometer = DELTA2\_NMR

Field\_strength = 9.389766[T] (400[MHz])  
 X\_acq\_duration = 1.36577024[s]  
 X\_domain = 1H  
 X\_freq = 399.78219838[MHz]  
 X\_offset = 5[ppm]  
 X\_points = 16384  
 X\_prescans = 1  
 X\_resolution = 0.73218757[Hz]  
 X\_sweep = 11.99616123[kHz]  
 IR\_domain = 1H  
 IR\_freq = 399.78219838[MHz]  
 IR\_offset = 5[ppm]  
 Tri\_domain = 1H  
 Tri\_freq = 399.78219838[MHz]  
 Tri\_offset = 5[ppm]  
 Clipped = FALSE  
 Mod\_return = 1  
 Scans = 16  
 Total\_scans = 16

X\_90\_width = 11.57[us]  
 X\_acq\_time = 1.36577024[s]  
 X\_angle = 45[deg]  
 X\_atn = 5[dB]  
 X\_pulse = 5.785[us]  
 IR\_mode = Off  
 Tri\_mode = Off  
 Dante\_preset = FALSE  
 Initial\_wait = 1[s]  
 Recvr\_gain = 30  
 Relaxation\_delay = 4[s]  
 Repetition\_time = 5.36577024[s]  
 Temp\_get = 22.5[dC]

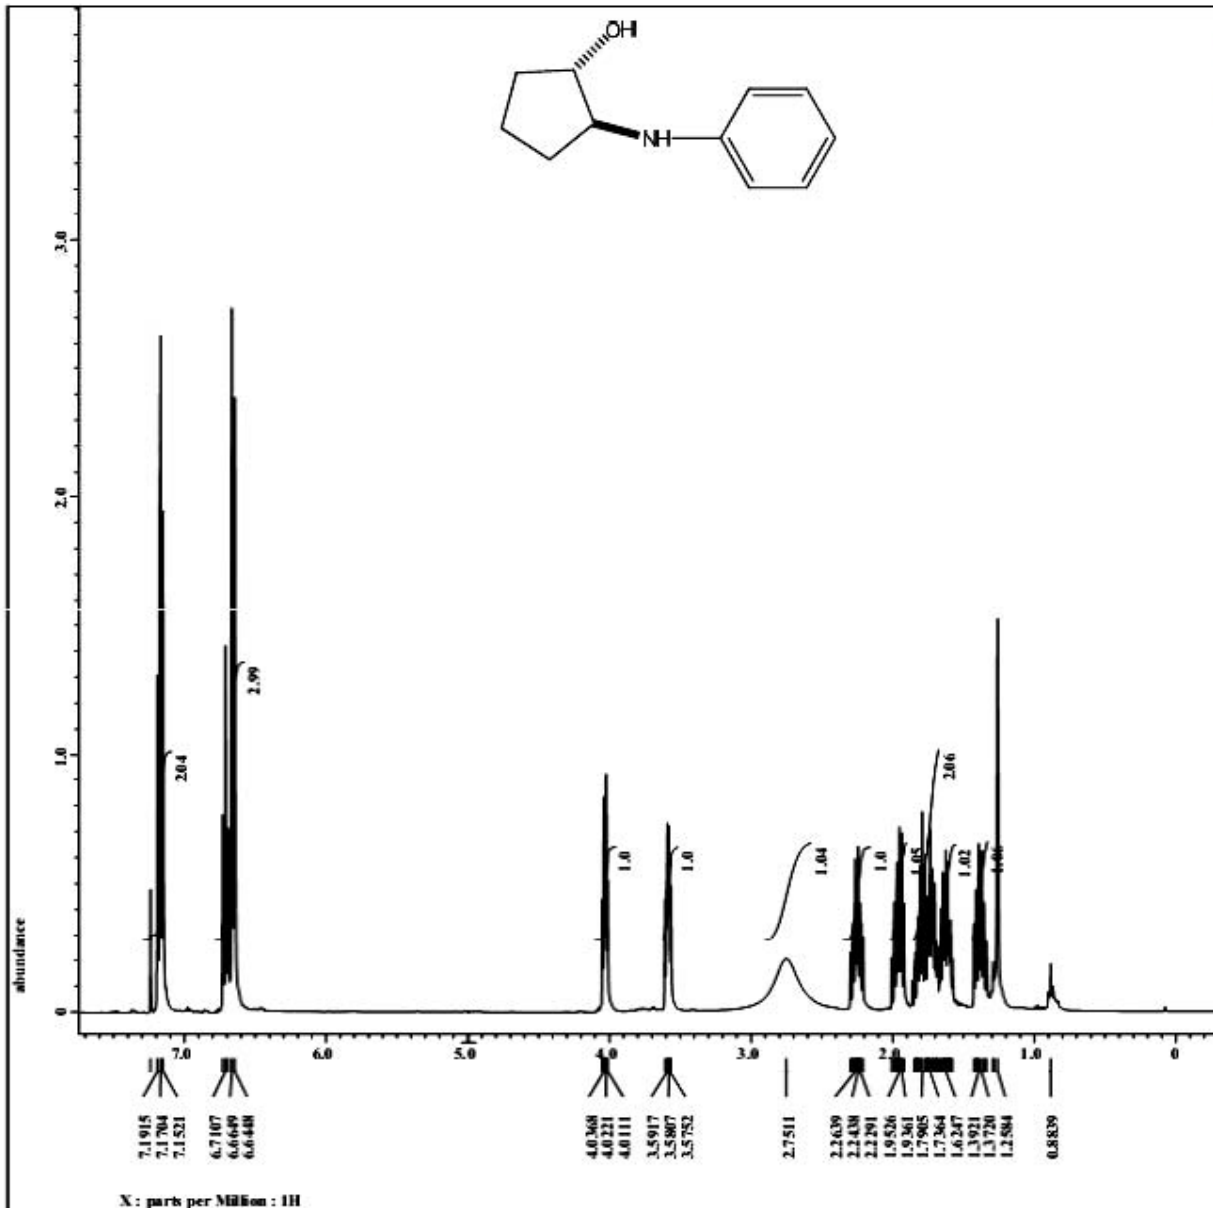

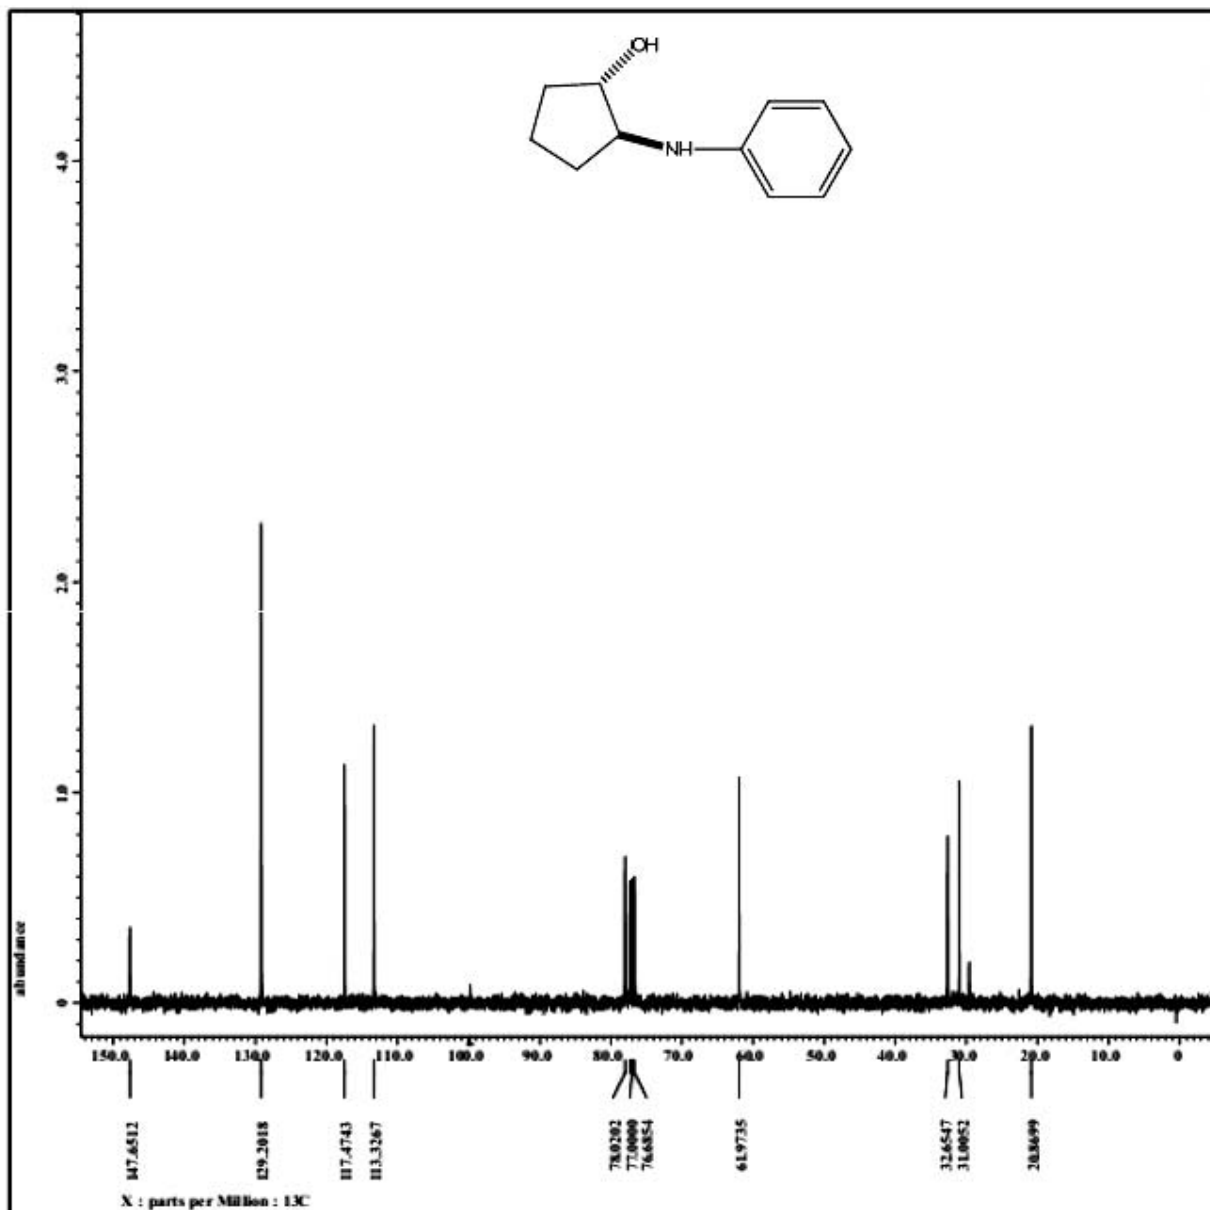

```

Filename      = SS ANLCHO_CARBON-3.jd
Author       = delta
Experiment   = single_pulse_dec
Sample_id    = SS ANLCHO
Solvent      = CHLOROFORM-D
Creation_time = 26-DEC-2011 23:43:19
Revision_time = 26-DEC-2011 23:46:07
Current_Time = 29-JUL-2012 16:49:12

Comment      = SS ANLCHO
Data_format  = 1D COMPLEX
Data_size    = 26214
Dir_title    = 13C
Dir_units    = [ppm]
Dimensions   = X
Site         = KXC 400P
Spectrometer = DELTA2_MMR

Field_strength = 9.389766[T] [400[Mhz]]
X_acq_duration = 1.0433332[s]
X_domain      = 13C
X_freq        = 100.62530333 [MHz]
X_offset      = 100[ppm]
X_points      = 32768
X_prescans    = 4
X_resolution  = 0.95846665 [Hz]
X_sweep       = 31.40703518 [kHz]
Irr_domain    = 1H
Irr_freq      = 399.78219838 [MHz]
Irr_offset    = 5[ppm]
Clipped       = FALSE
Modulation    = -
Scale         = 14
Total_scans   = 14

X_90_width    = 11.75[us]
X_acq_time    = 1.0433332[s]
X_angle       = 30[deg]
X_atn         = 10[db]
X_pulse       = 3.91666667[us]
Irr_atn_dec   = 24.95[db]
Irr_atn_pow   = 24.95[db]
Irr_noise     = WALTZ
Decoupling    = FMR
Initial_wait  = 1[s]
New_time      = 786
New_time      = 2[s]
Recvr_gain    = 60
Relaxation_delay = 2[s]
Repetition_time = 3.0433332[s]
Temp_get      = 22.9[dc]
  
```

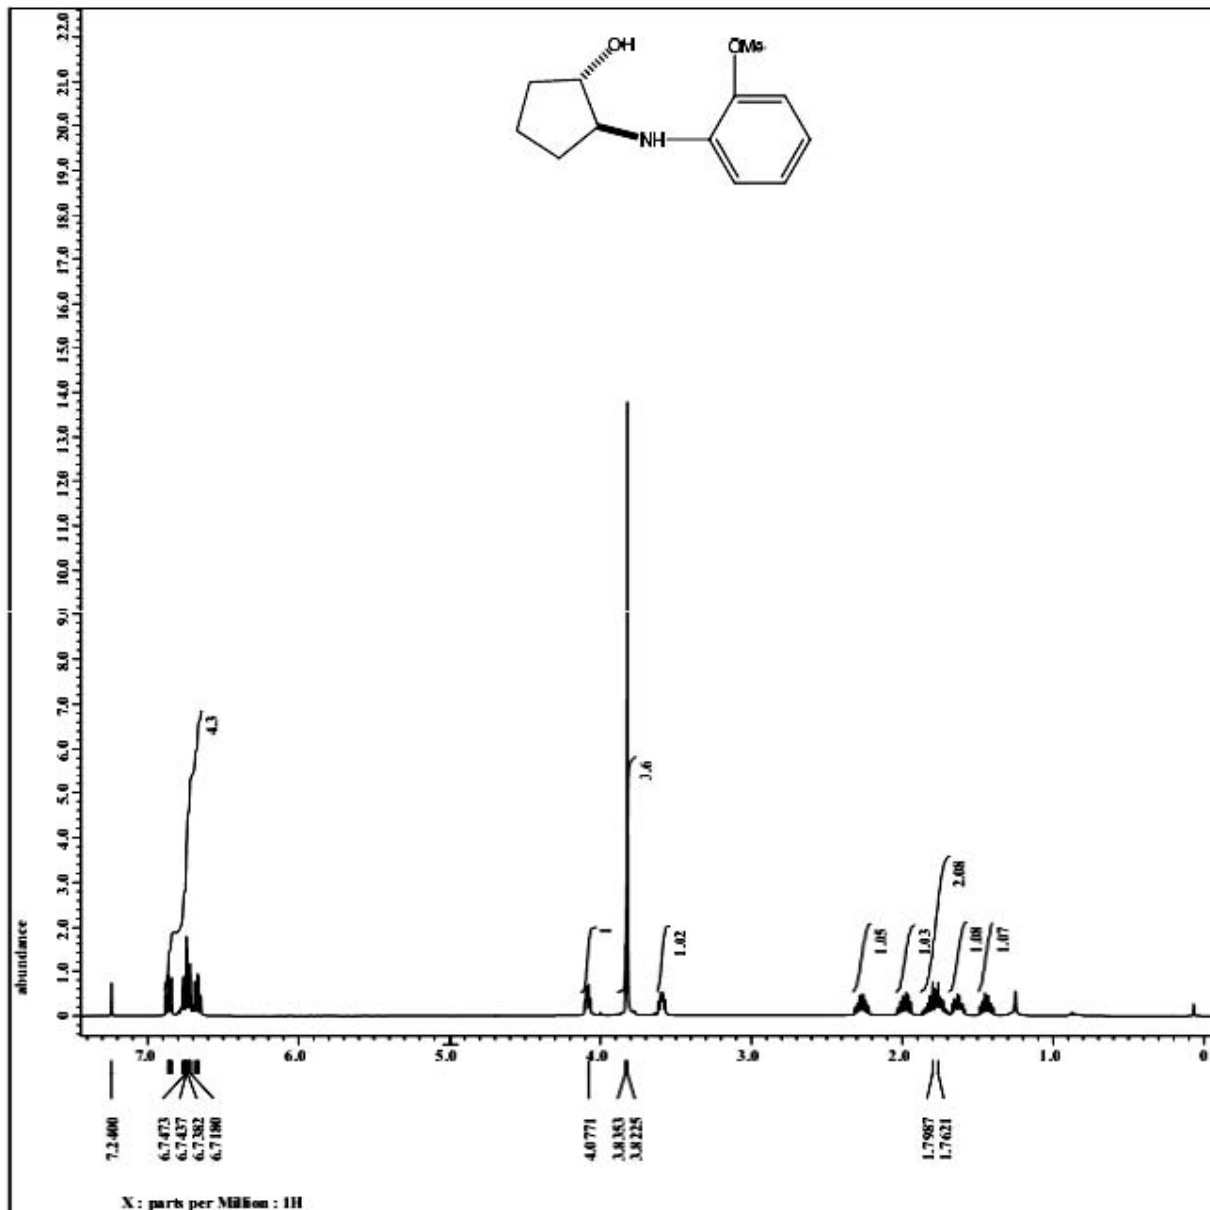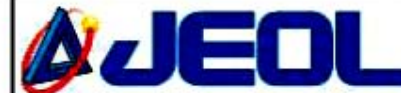

Filename = SS CPOOM\_PROTON-4.jdf  
 Author = delta  
 Experiment = single\_pulse.ex2  
 Sample\_id = SS CPOOM  
 Solvent = CHLOROFORM-D  
 Creation\_time = 20-DEC-2011 12:42:53  
 Revision\_time = 29-JUL-2012 16:51:22  
 Current\_time = 29-JUL-2012 16:51:51

Comment = SS CPOOM  
 Data\_format = 1D\_COMPLEX  
 Dim\_size = 13107  
 Dim\_title = 1H  
 Dim\_units = [ppm]  
 Dimensions = X  
 Site = ECK 400P  
 Spectrometer = DELTA2\_NMR

Field\_strength = 9.389766[T] (400[MHz])  
 X\_acq\_duration = 1.36577024[s]  
 X\_domain = 1H  
 X\_freq = 399.78219838[MHz]  
 X\_offset = 5[ppm]  
 X\_points = 16384  
 X\_prescans = 1  
 X\_resolution = 0.73218757[Hz]  
 X\_sweep = 11.99616123[kHz]  
 IR\_domain = 1H  
 IR\_freq = 399.78219838[MHz]  
 IR\_offset = 5[ppm]  
 Tri\_domain = 1H  
 Tri\_freq = 399.78219838[MHz]  
 Tri\_offset = 5[ppm]  
 Clipped = FALSE  
 Mod\_return = 1  
 Scans = 16  
 Total\_scans = 16

X\_90\_width = 11.57[us]  
 X\_acq\_time = 1.36577024[s]  
 X\_angle = 45[deg]  
 X\_atn = 5[dB]  
 X\_pulse = 5.795[us]  
 IR\_mode = Off  
 Tri\_mode = Off  
 Dante\_preset = FALSE  
 Initial\_wait = 1[s]  
 Recvr\_gain = 32  
 Relaxation\_delay = 4[s]  
 Repetition\_time = 5.36577024[s]  
 Temp\_get = 22.1[dC]

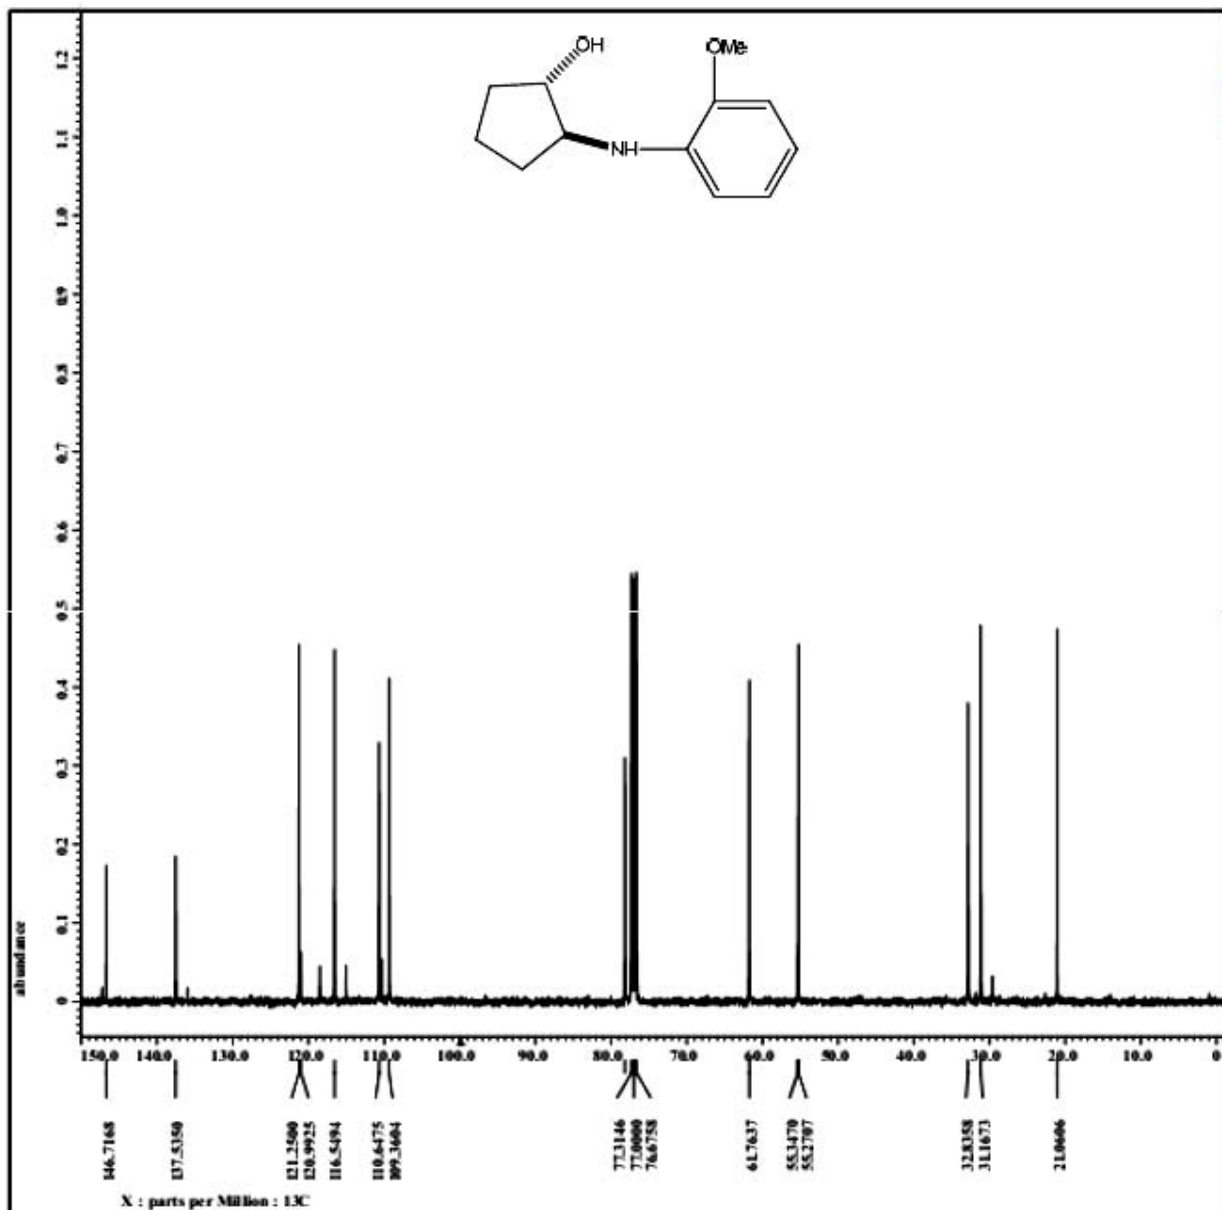

```

Filename      = SS CPOON_CARBON-4.jdf
Author       = delta
Experiment   = single_pulse_dec
Sample_id    = SS CPOON
Solvent      = CHLOROFORM-D
Creation_time = 24-DEC-2011 00:19:43
Revision_time = 29-JUL-2012 16:53:00
Current_Time = 29-JUL-2012 16:53:10

Comment      = SS CPOON
Data_format  = 1D COMPLEX
Data_size    = 26214
Data_title   = 13C
Data_units   = [ppm]
Dimensions   = X
Site         = KCM 400P
Spectrometer = DELTA2_MMR

Field_strength = 9.389766[T] [400[MHz]]
X_acq_duration = 1.0433332[s]
X_domain       = 13C
X_freq         = 100.62530333[MHz]
X_offset       = 100[ppm]
X_points       = 32768
X_prescans     = 4
X_resolution   = 0.95846665[Hz]
X_sweep        = 31.40703518[kHz]
Irr_domain     = 1H
Irr_freq       = 399.78219838[MHz]
Irr_offset     = 5[ppm]
Clipped       = FALSE
Proc_method    =
Scale         = 393
Total_scans    = 393

X_90_width    = 11.75[us]
X_acq_time     = 1.0433332[s]
X_angle        = 30[deg]
X_atn          = 10[db]
X_pulse        = 3.91666667[us]
Irr_atn_dec    = 24.95[db]
Irr_atn_now    = 24.95[db]
Irr_noise      = WALTZ
Decoupling     = FMR
Initial_wait   = 1[s]
New_time       = 766
New_time       = 2[s]
RecVr_gain     = 58
Relaxation_delay = 2[s]
Repetition_time = 3.0433332[s]
Temp_get       = 22.1[dc]
  
```



BKS\_CP-POME\_CARBON-3.jdf

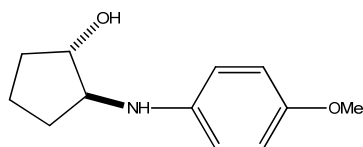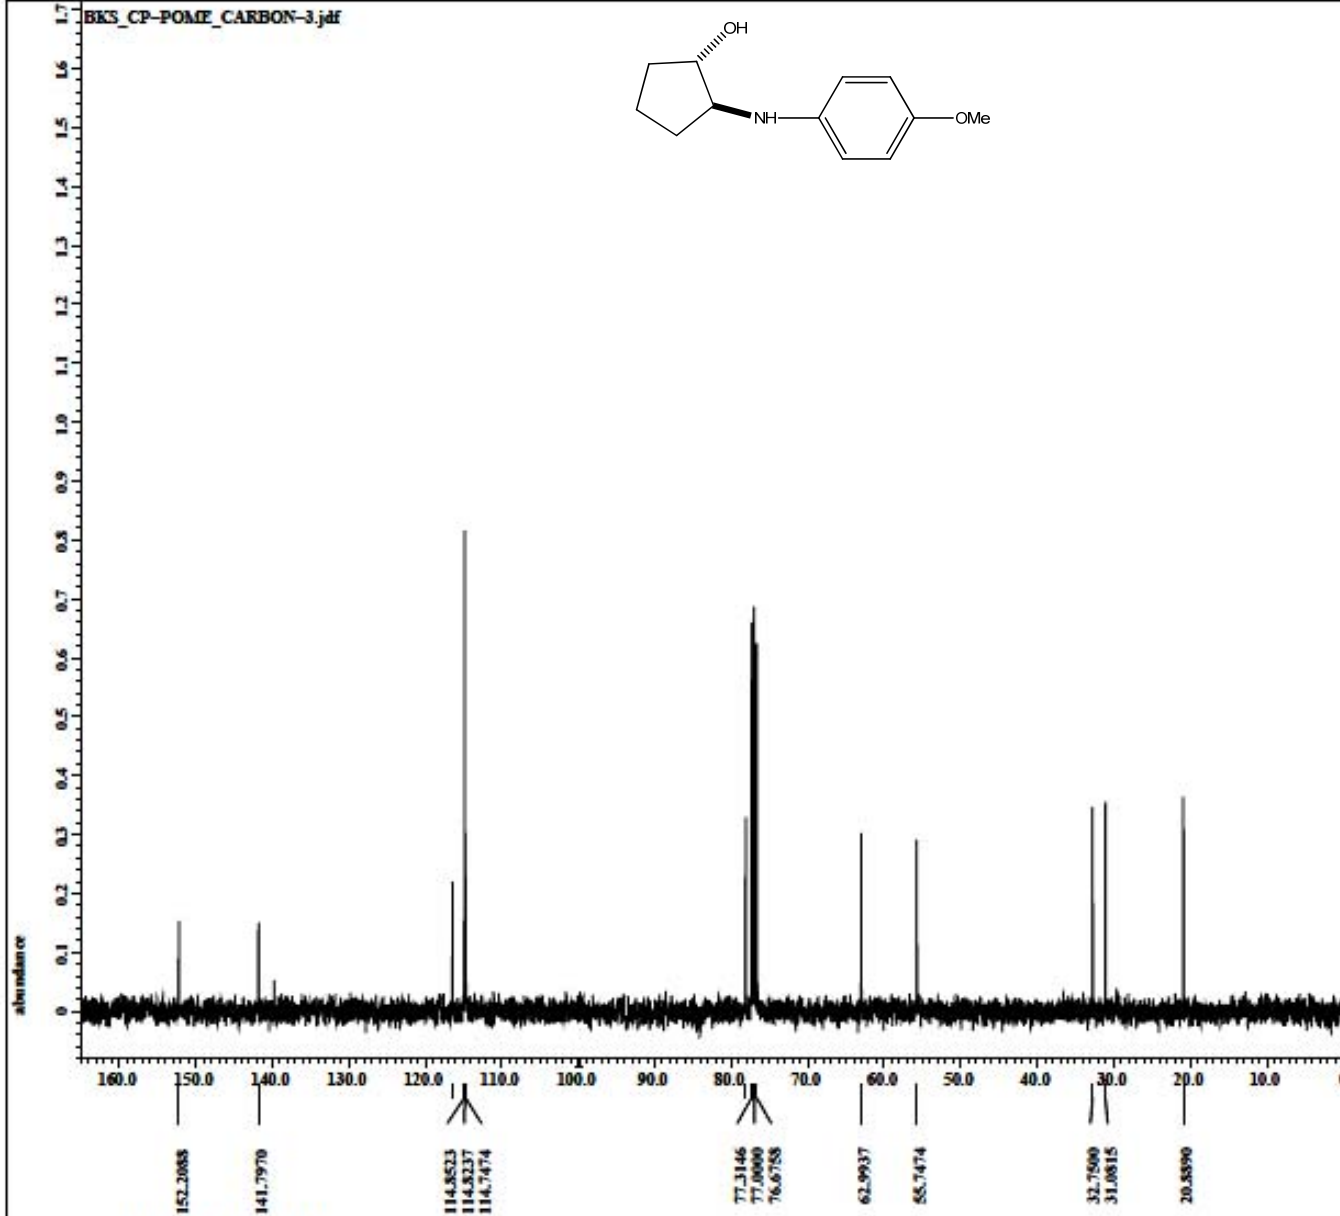

X : part per Million : 13C

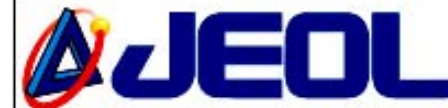

Filename = BKS\_CP-POME\_CARBON-3.  
Author = delta  
Experiment = single\_pulse\_dec  
Sample id = BKS\_CP-POME  
Solvent = CHLOROFORM-D  
Creation time = 26-DEC-2011 23:17:34  
Revision time = 26-DEC-2011 23:20:22  
Current time = 15-JAN-2012 16:55:26

Comment = BKS\_CP-POME  
Data format = 1D COMPLEX  
Dim size = 26214  
Dim title = 13C  
Dim units = [ppm]  
Dimensions = X  
Site = RCI 400P  
Spectrometer = DELTA2\_NMR

Field strength = 9.389766 [T] (400 [MHz])  
F1 acq duration = 1.04333312 [s]  
F1 domain = 13C  
F1 freq = 100.52530333 [MHz]  
F1 offset = 100 [ppm]  
F1 points = 32768  
F1 prescans = 4  
F1 resolution = 0.95846665 [Hz]  
F1 sweep = 31.40703518 [kHz]  
Irr domain = 1H  
Irr freq = 399.78219838 [MHz]  
Irr offset = 5 [ppm]  
Clipped = FALSE  
Mod return = 1  
Scans = 20  
Total scans = 20

F2 90 width = 11.75 [us]  
F2 acq time = 1.04333312 [s]  
F2 angle = 30 [deg]  
F2 atm = 10 [dB]  
F2 pulse = 3.91666667 [us]  
Irr atm\_dec = 24.95 [dB]  
Irr atm\_noe = 24.95 [dB]  
Irr noise = WALTZ  
Decoupling = TRUE  
Initial wait = 1 [s]  
Noe = TRUE  
Noe time = 2 [s]  
Recvr gain = 58  
Relaxation delay = 2 [s]  
Repetition time = 3.04333312 [s]  
Temp\_get = 22.6 [dC]

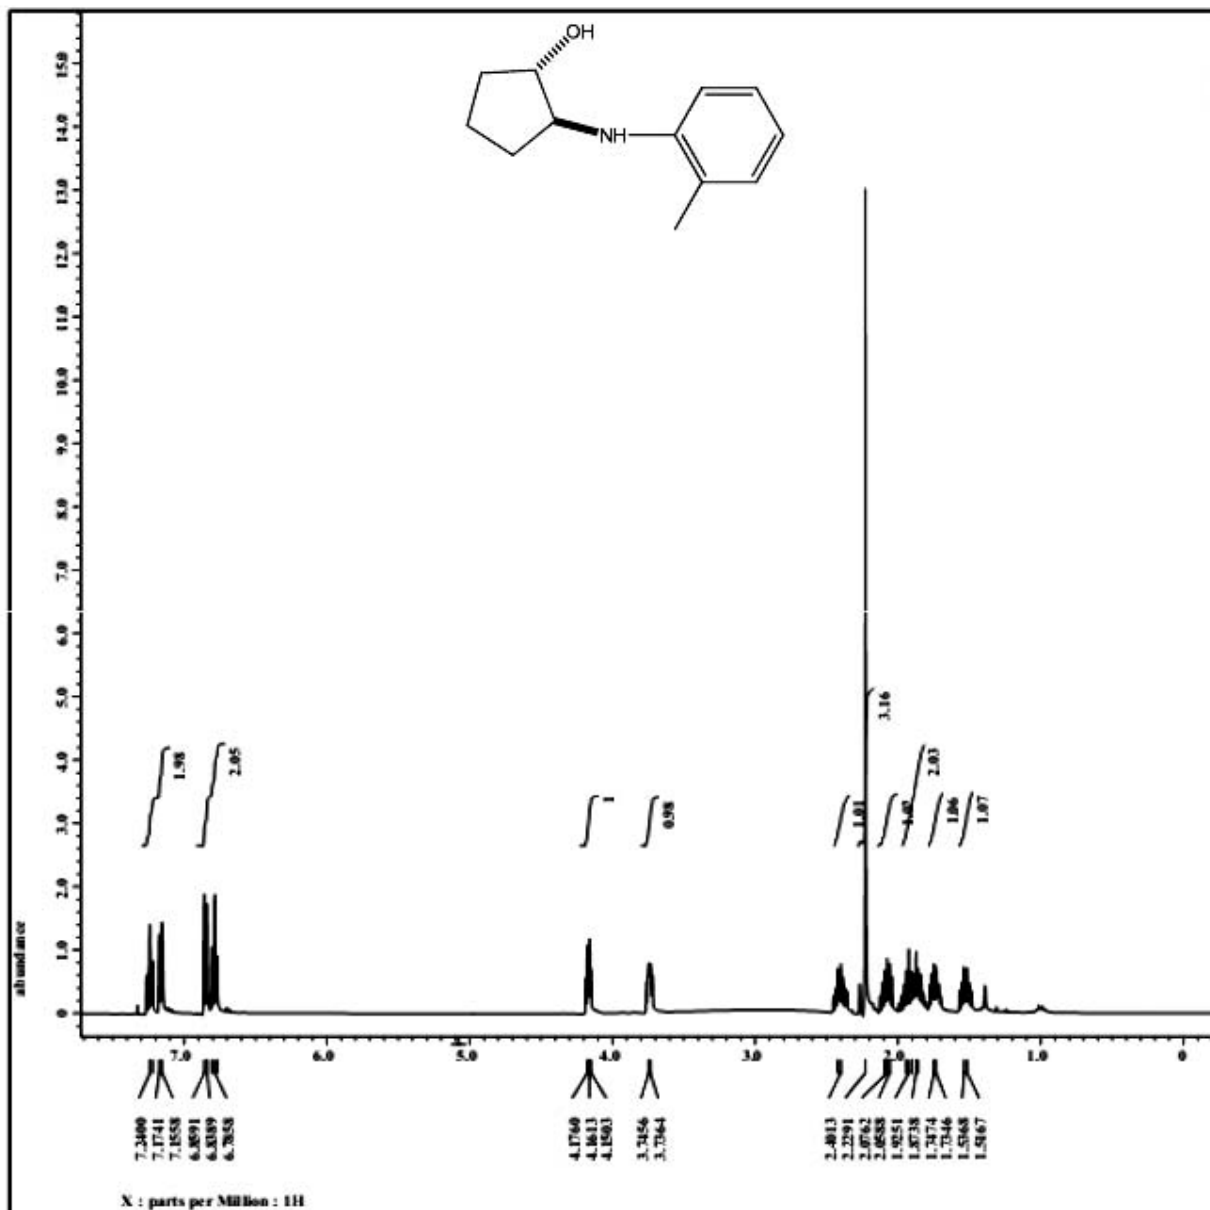

```

Filename      = SS 3-75 OTD PHOTON-4.
Author        = delta
Experiment    = single_pulse_ax2
Sample_id     = SS 3-75 OTD
Solvent       = CHLOROFORM-D
Creation_time = 8-MAY-2012 09:32:01
Revision_time = 29-JUL-2012 16:34:07
Current_Time  = 29-JUL-2012 16:34:13

Comment       = SS 3-75 OTD
Data_format   = 1D COMPLEX
Dir_size      = 13107
Dir_title     = 1H
Dir_units     = [ppm]
Dimensions    = X
Site          = KCM 400P
Spectrometer  = DELTA2_MMR

Field_strength = 9.389766[T] [400[MHz]]
X_acq_duration = 1.36577024[s]
X_domain       = 1H
X_freq         = 399.78219838[MHz]
X_offset       = 5[ppm]
X_points       = 16384
X_prescans     = 1
X_resolution   = 0.73218757[Hz]
X_sweep        = 11.99616123[kHz]
Irr_domain     = 1H
Irr_freq       = 399.78219838[MHz]
Irr_offset     = 5[ppm]
Tri_domain     = 1H
Tri_freq       = 399.78219838[MHz]
Tri_offset     = 5[ppm]
Clipped        = FALSE
Mod_return     = 1
Scans          = 16
Total_scans    = 16

X_90_width    = 11.57[us]
X_acq_time     = 1.36577024[s]
X_angle        = 45[deg]
X_atn          = 5[db]
X_pulse        = 5.785[us]
Irr_mode       = Off
Tri_mode       = Off
Dnfs_preset   = FALSE
Init_wait     = 1[s]
Recvr_gain     = 24
Relaxation_delay = 4[s]
Repetition_time = 5.36577024[s]
Temp_get       = 22.5[dc]
  
```

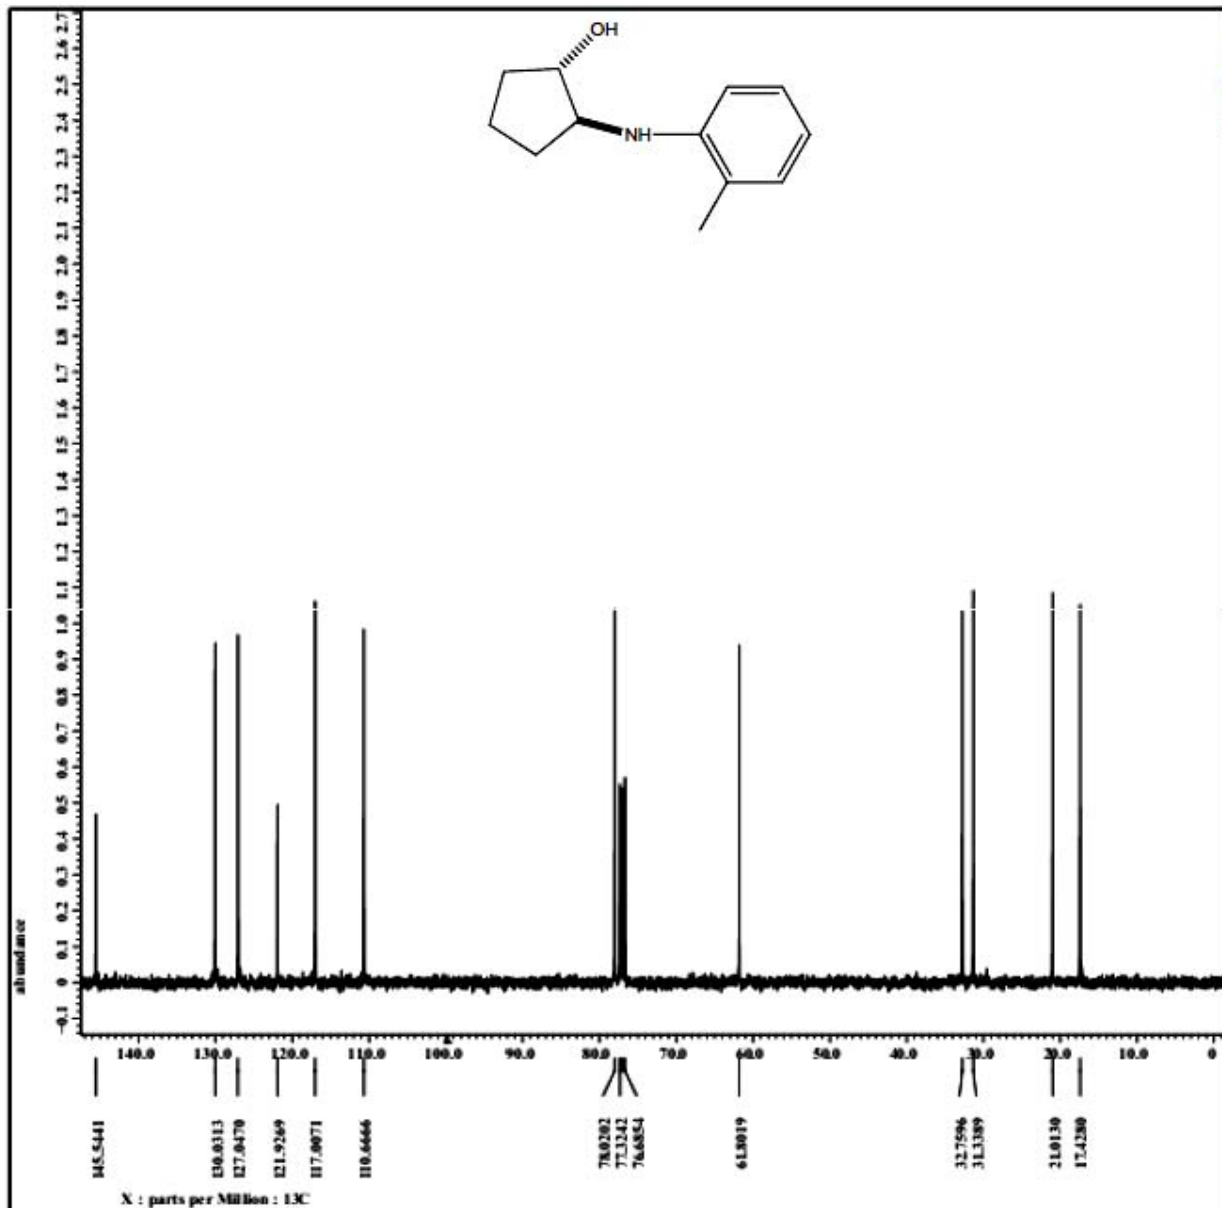

```

Filename      = DR_3-75_OTD_CARBON-3.
Author       = delta
Experiment   = single_pulse_dec
Sample_id    = DR_3-75_OTD
Solvent      = CHLOROFORM-D
Creation_time = 11-MAY-2012 00:46:44
Revision_time = 11-MAY-2012 01:00:44
Current_Time = 29-JUL-2012 16:36:32

Comment      = DR_3-75_OTD
Data_format  = 1D_COMPLEX
Data_size    = 26214
Dir_title    = 13C
Dir_units    = [ppm]
Dimensions   = X
Site         = KXC 400P
Spectrometer = DELTA2_MMR

Field_strength = 9.389766[T] [400[MHz]]
X_acq_duration = 1.04333312[s]
X_domain      = 13C
X_freq        = 100.62530333 [MHz]
X_offset      = 100[ppm]
X_points      = 32768
X_prescans    = 4
X_resolution  = 0.95846665 [Hz]
X_sweep       = 31.40703518 [kHz]
Irr_domain    = 1H
Irr_freq      = 399.78219838 [MHz]
Irr_offset    = 5[ppm]
Clipped      = FALSE
Proc_method   = -
Scale        = 24
Total_scans   = 24

X_90_width    = 11.75[us]
X_acq_time     = 1.04333312[s]
X_angle       = 30[deg]
X_atn         = 10[db]
X_pulse       = 3.91666667[us]
Irr_atn_dec   = 24.95[db]
Irr_atn_now   = 24.95[db]
Irr_noise     = WALTZ
Decoupling    = FMR
Initial_wait  = 1[s]
Nox_time      = FMR
Nox_time      = 2[s]
Recvr_gain    = 56
Relaxation_delay = 2[s]
Repetition_time = 3.04333312[s]
Temp_get      = 22.9[dc]
  
```



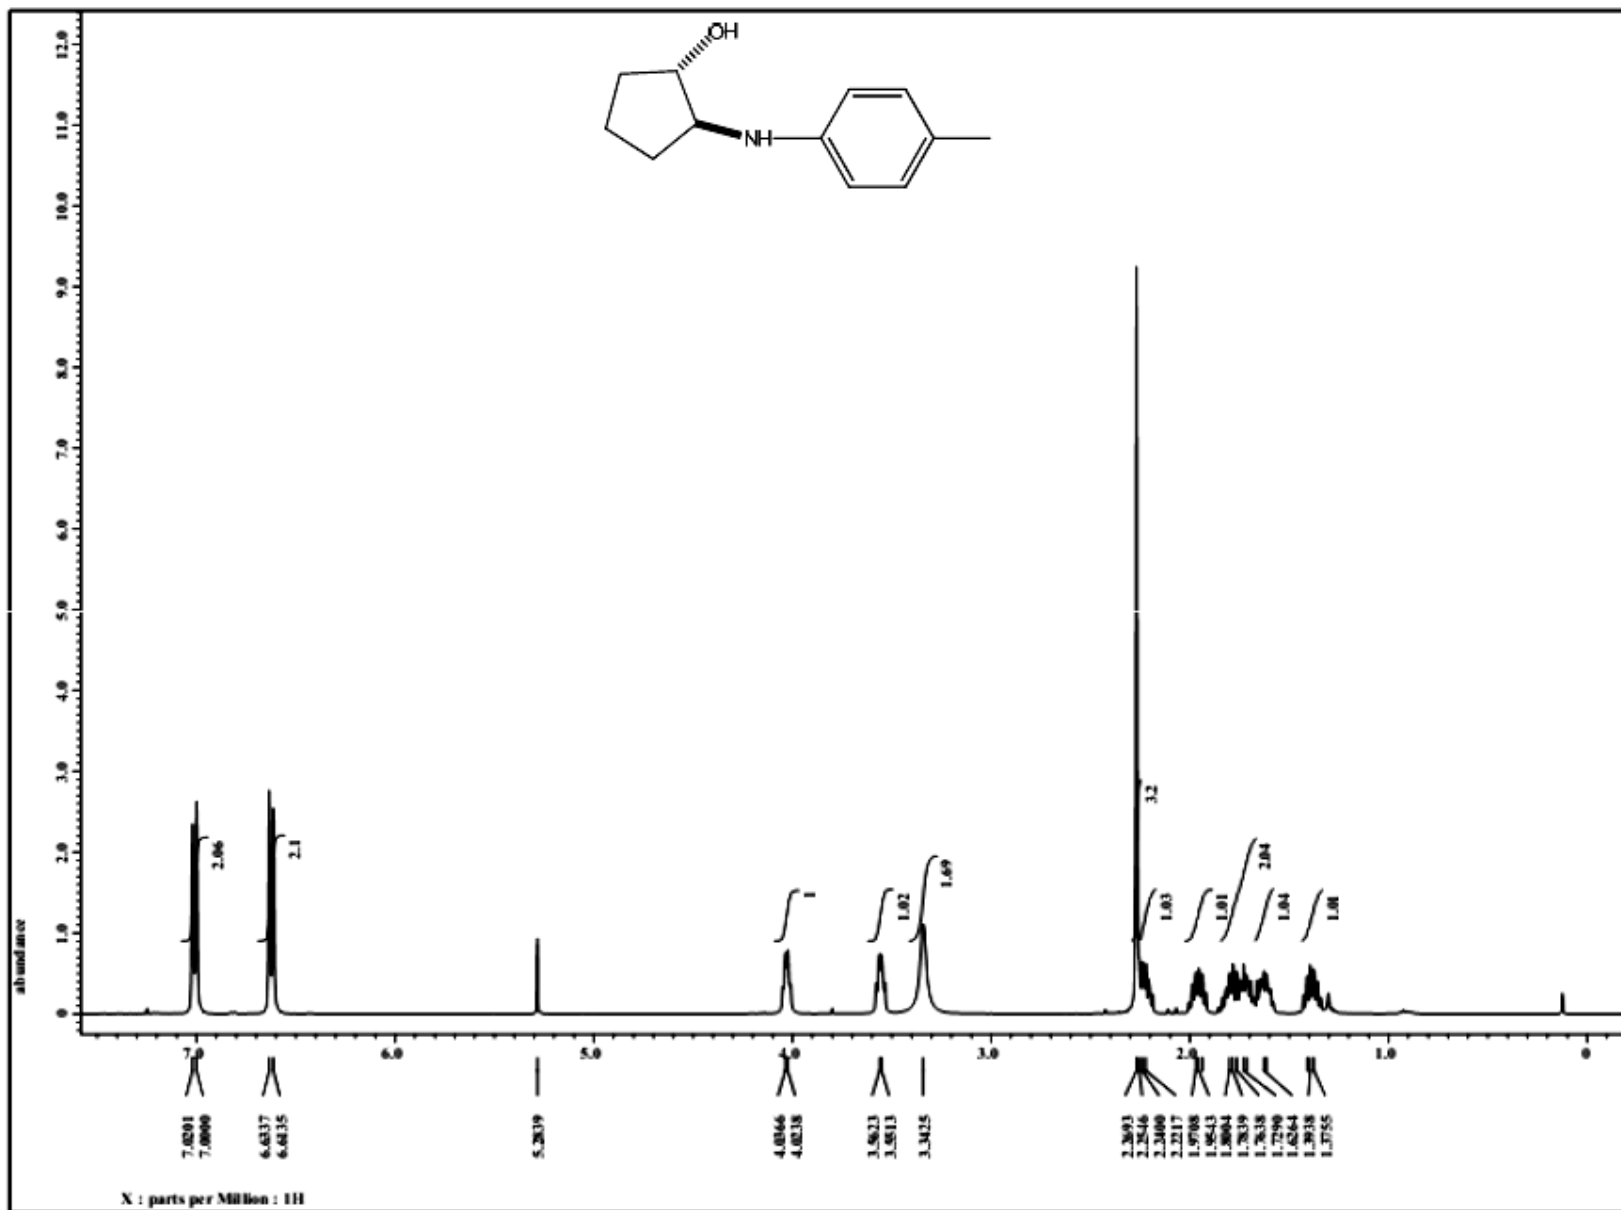

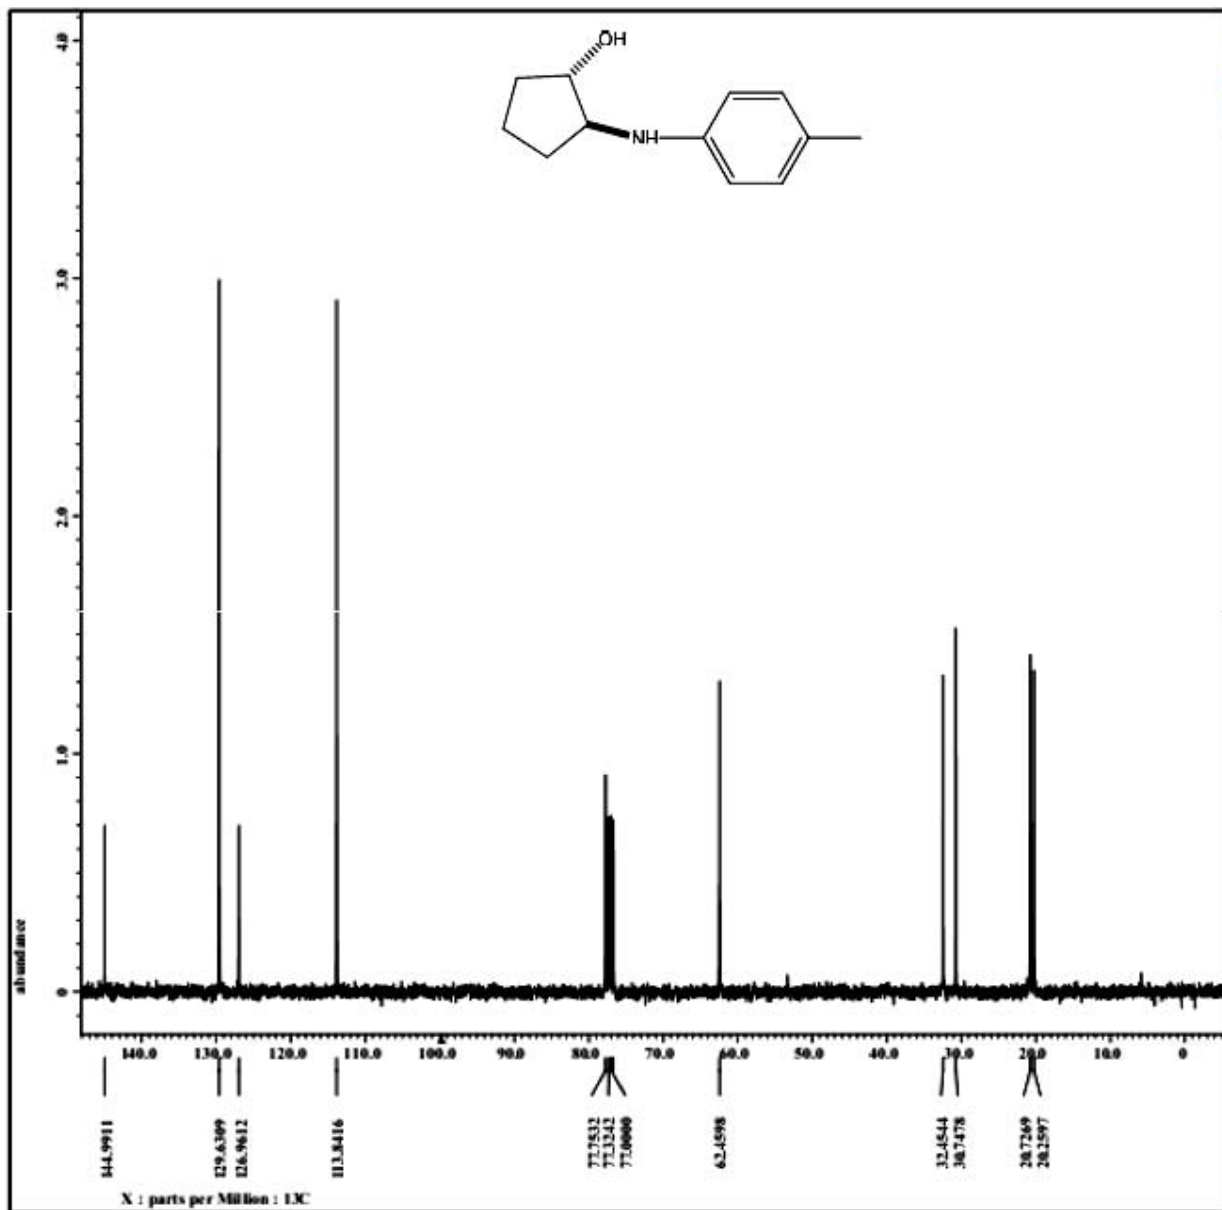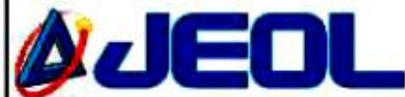

```

Filename      = SS 3-75_PT_CARDON-3.)
Author        = delta
Experiment    = single_pulse_dec
Sample_id     = SS 3-75 PT
Solvent       = CHLOROFORM-D
Creation_time  = 12-MAY-2012 16:39:52
Revision_time = 12-MAY-2012 16:53:46
Current_time  = 29-JUL-2012 16:35:01

Comment       = SS 3-75 PT
Data_format   = 1D_COMPLEX
Dir_size      = 26214
Dir_title     = 13C
Dir_units     = [ppm]
Dimensions    = X
Site          = RCK 400P
Spectrometer  = DELTA2_MMR

Field_strength = 9.389766[T] [400[MHz]]
X_acq_duration = 1.04333312[s]
X_domain       = 13C
X_freq         = 100.52530333 [MHz]
X_offset       = 100 [ppm]
X_points       = 32768
X_prescans     = 4
X_resolution   = 0.95846665 [Hz]
X_sweep        = 31.40703518 [kHz]
Irr_domain     = 1H
Irr_freq       = 399.78219838 [MHz]
Irr_offset     = 5 [ppm]
Clipped        = FALSE
wdw            = EM
ScaNs         = 14
Total_scans    = 14

X_90_width     = 11.75 [us]
X_acq_time     = 1.04333312 [s]
X_angle        = 30 [deg]
X_atn          = 10 [dB]
X_pulse        = 3.91666667 [us]
Irr_atn_dec    = 24.95 [dB]
Irr_atn_pow    = 24.95 [dB]
Irr_noise      = WALTZ
Decoupling     = TWHH
Initial_wait   = 1 [s]
Nox            = TWHH
Nox_time       = 2 [s]
RecVr_gain     = 58
Relaxation_delay = 2 [s]
Repetition_time = 3.04333312 [s]
Temp_get       = 22.9 [dC]
  
```

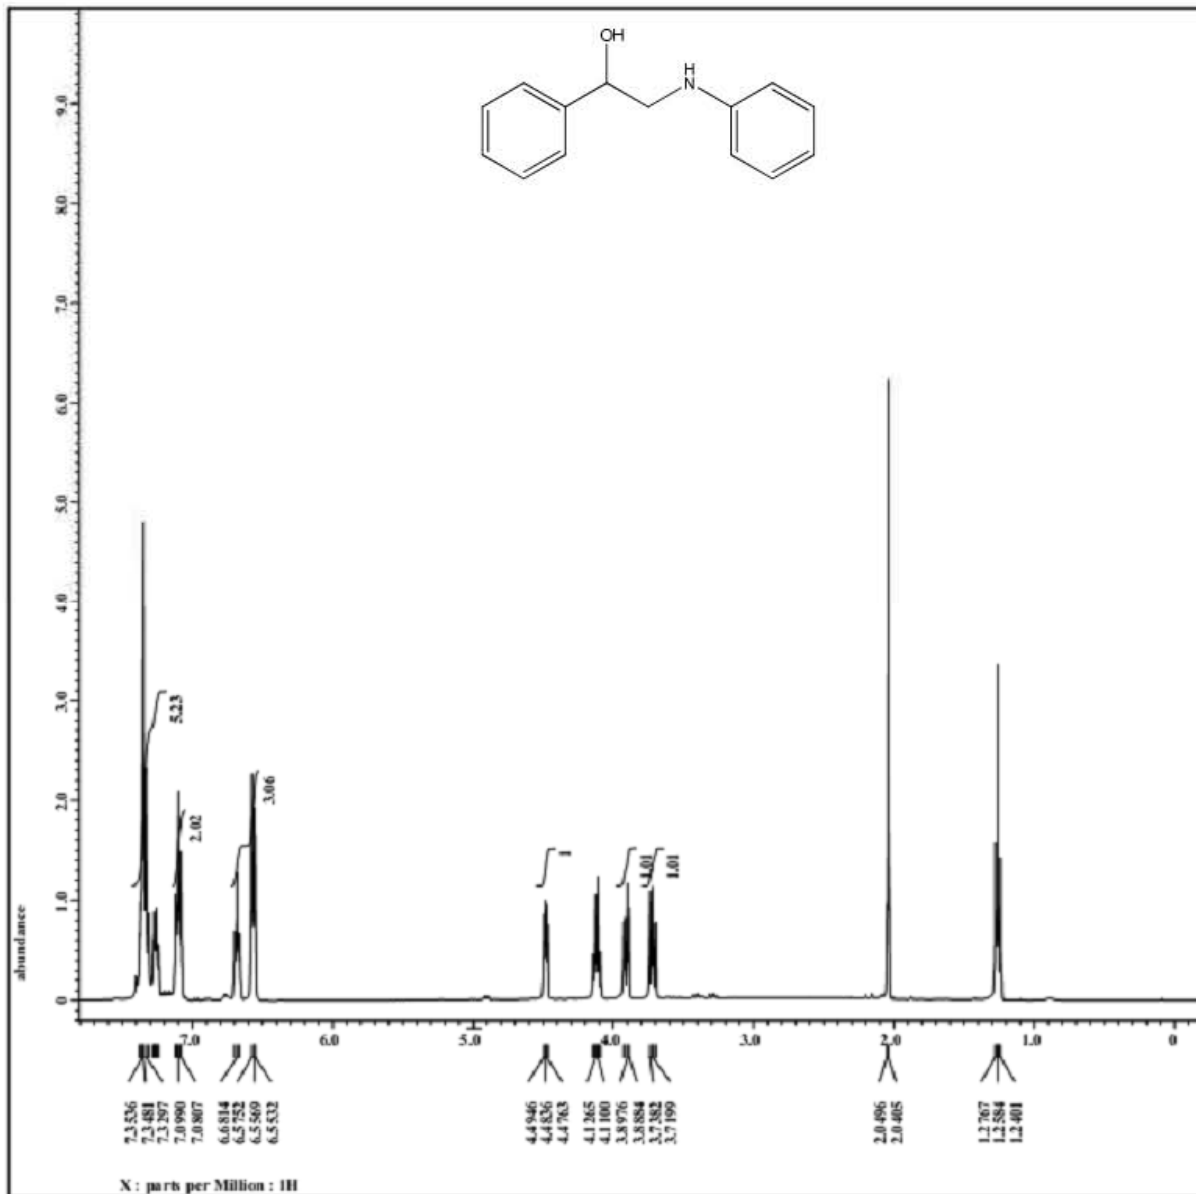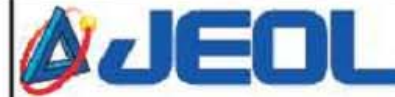

```

Filename      = SS 2-9ANL_PROTON-4.)d
Author       = delta
Experiment   = single pulse.ex2
Sample id    = SS 2-9ANL
Solvent      = CHLOROFORM-d
Creation time = 5-OCT-2011 12:04:30
Revision time = 6-AUG-2012 00:31:34
Current time  = 6-AUG-2012 00:34:18

Comment      = SS 2-9ANL
Data format  = 1D_COMPLEX
Bin_size     = 13107
Bin_title    = 1R
Bin_units    = [ppm]
Dimensions   = X
Site         = ECK 400P
Spectrometer = DELTA2 NMR

Field strength = 5.389766 [T] (400 [MHz])
X_acq_duration = 1.36577024 [s]
X_domain       = 1R
X_freq         = 399.78219838 [MHz]
X_offset       = 5 [ppm]
X_points       = 16384
X_prescans     = 1
X_resolution   = 0.73218757 [Hz]
X_sweep        = 11.99616123 [kHz]
Irr_domain     = 1R
Irr_freq       = 399.78219838 [MHz]
Irr_offset     = 5 [ppm]
Tri_domain     = 1R
Tri_freq       = 399.78219838 [MHz]
Tri_offset     = 5 [ppm]
Clipped        = FALSE
Mod_return     = 1
SCANS         = 16
Total_scans    = 16

X_90_width    = 11.57 [us]
X_acq_time     = 1.36577024 [s]
X_angle        = 45 [deg]
X_atn          = 5 [dB]
X_pulse        = 5.785 [us]
Irr_mode       = OFF
Tri_mode       = OFF
Dante_presat   = FALSE
Initial_wait   = 1 [s]
Recvs_gain     = 18
Relaxation_delay = 4 [s]
Repetition_time = 5.36577024 [s]
Temp_get       = 22.4 [C]
  
```

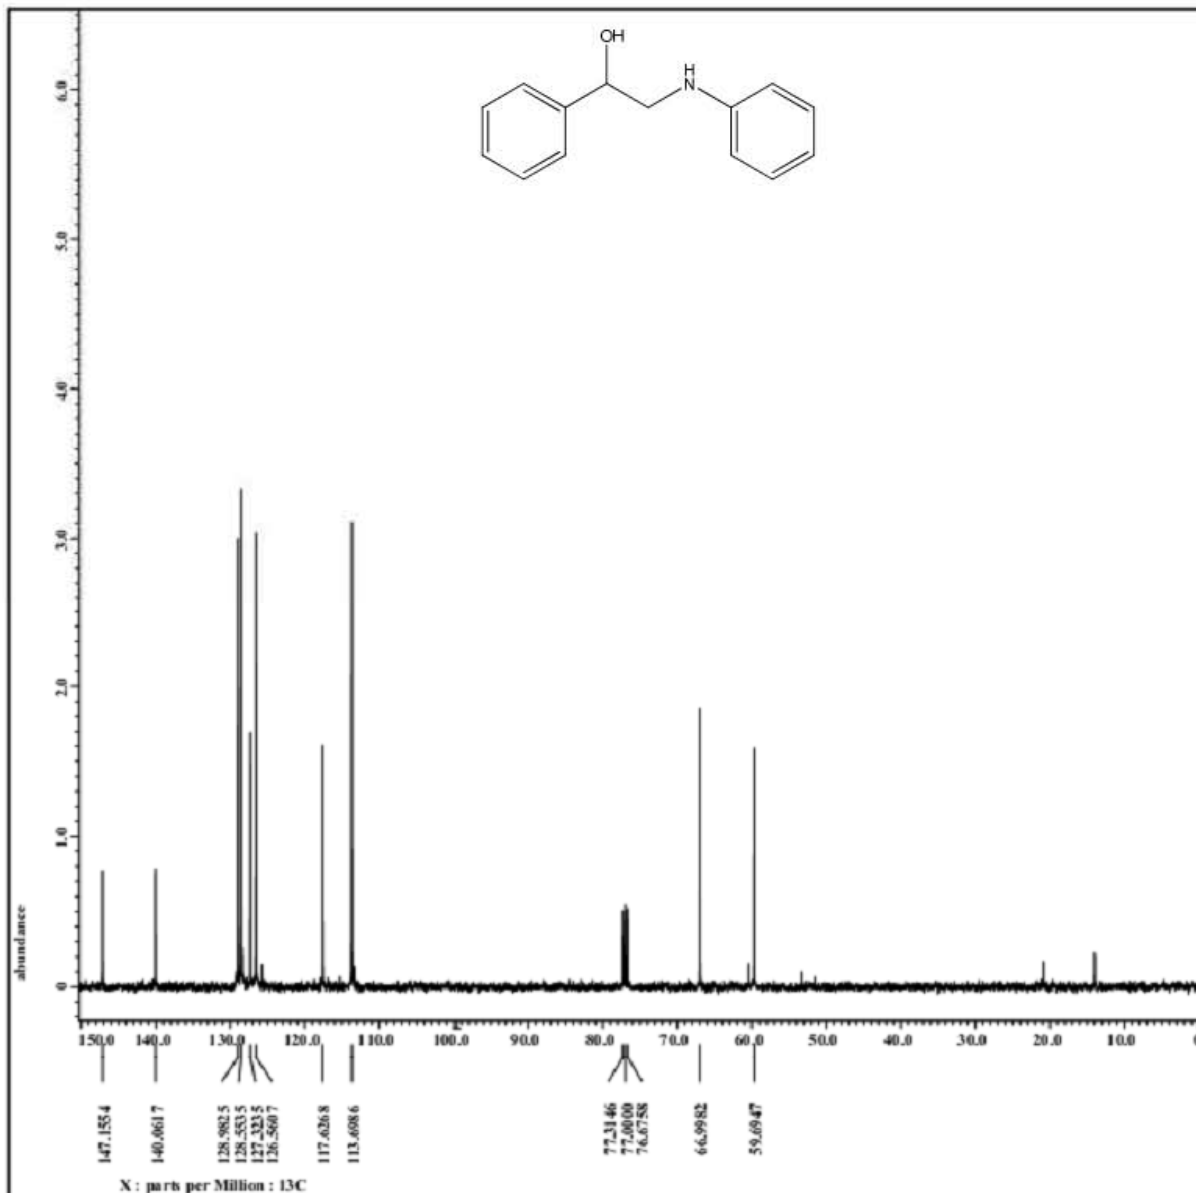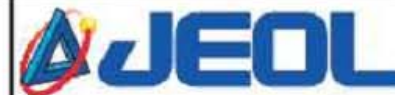

```

Filename      = FH-2-9ANL_CARBON-4.jd
Author       = delta
Experiment   = single pulse_dec
Sample_id    = FH-2-9ANL
Solvent      = CHLOROFORM-d
Creation_time = 15-OCT-2011 00:24:02
Revision_time = 6-AUG-2012 00:35:07
Current_time  = 6-AUG-2012 00:35:23

Comment      = FH-2-9ANL
Data_format  = 1D COMPLEX
Bin_size     = 26214
Bin_title    = 13C
Bin_units    = [ppm]
Dimensions   = X
Site         = ECK 400P
Spectrometer = DELTA2 NMR

Field_strength = 9.399766[T] (400[MHz])
X_acq_duration = 1.04333312[s]
X_domain       = 13C
X_freq         = 100.52533333[MHz]
X_offset      = 100[ppm]
X_points       = 32768
X_prescans    = 4
X_resolution  = 0.93846665[Hz]
X_sweep       = 31.40703518[kHz]
Irr_domain    = 1H
Irr_freq      = 399.78219838[MHz]
Irr_offset    = 5[ppm]
Clipped       = FALSE
Mod_return    = 1
Scans         = 14
Total_scans   = 14

X_90_width    = 11.75[us]
X_acq_time    = 1.04333312[s]
X_angle       = 30[deg]
X_atn         = 10[db]
X_pulse       = 3.91666667[us]
Irr_atn_dec   = 24.95[db]
Irr_atn_noe   = 24.95[db]
Irr_noise     = WALTZ
Decoupling    = TRUE
Initial_wait  = 1[s]
Noe           = TRUE
Noe_time      = 2[s]
Recvr_gain    = 58
Relaxation_delay = 2[s]
Repetition_time = 3.04333312[s]
Temp_get      = 22.4[degC]
  
```

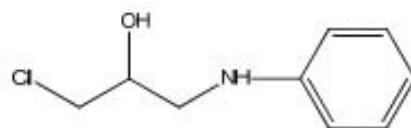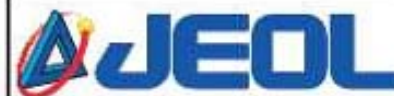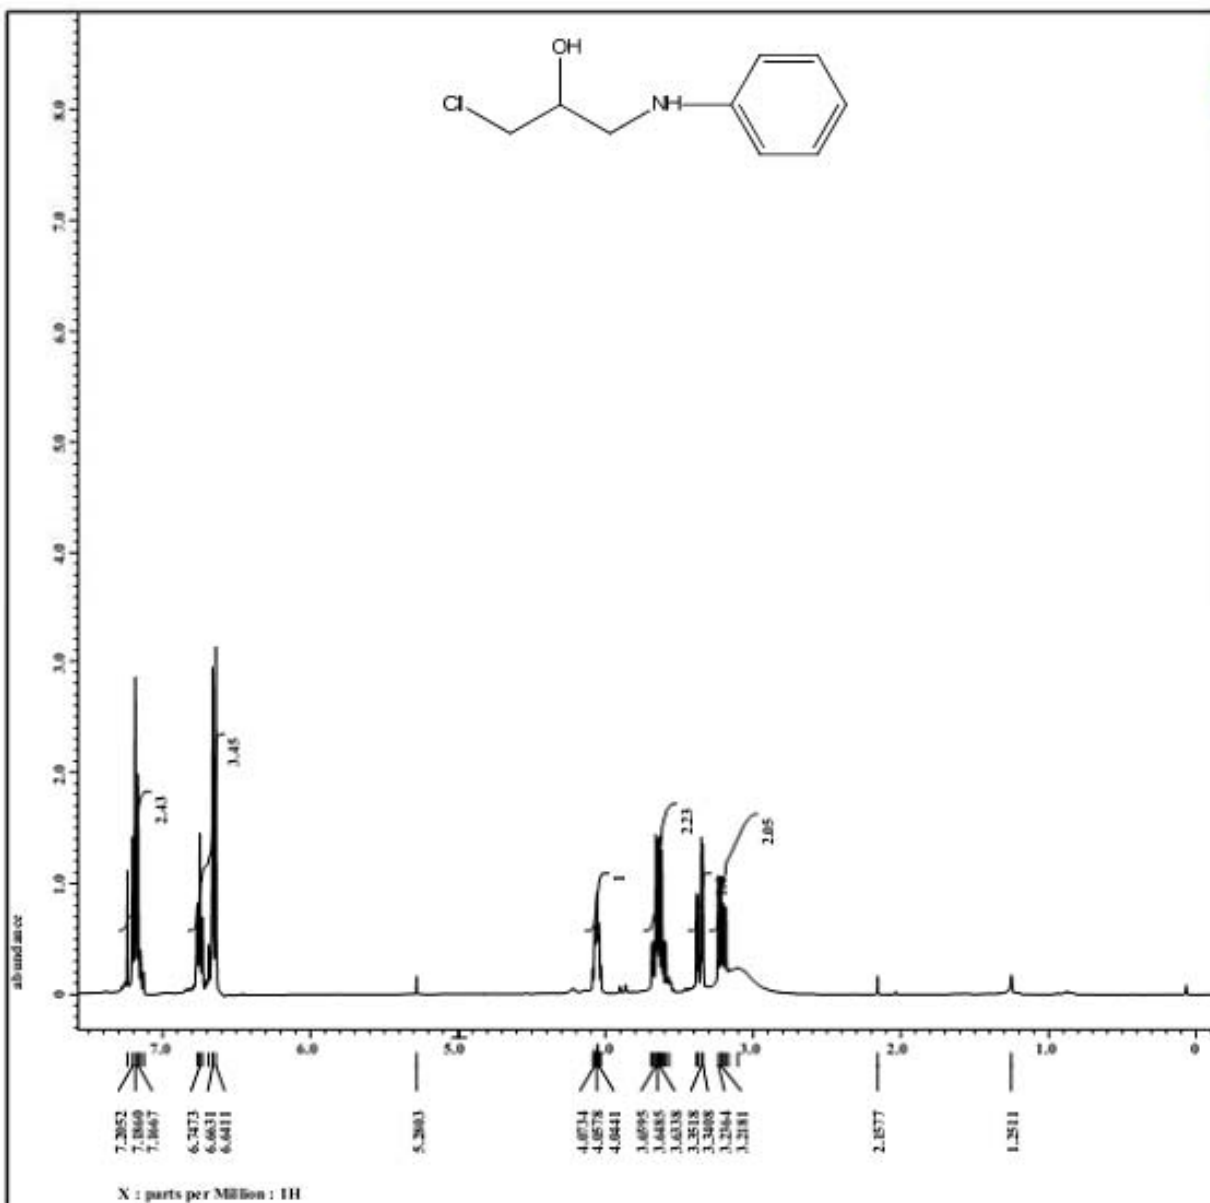

```

Filename      = SS 3-SEPI_PROTON-4.jd
Author        = delta
Experiment    = single pulse.ex2
Sample id     = SS 3-SEPI
Solvent       = CDCl3/CF3COOH-D
Creation time  = 26-OCT-2011 14:42:42
Revision time = 29-JUL-2012 16:04:45
Current Time  = 29-JUL-2012 16:05:05

Comment       = SS 3-SEPI
Data format   = 1D COMPLEX
Dir_size      = 13107
Dir_title     = 1H
Dir_units     = [ppm]
Dimensions    = X
Site          = HXK 400P
Spectrometer  = DELTA2 300B

Field strength = 9.389766[T] (400[Mhz])
X_acq_duration = 1.36577024[s]
X_domain       = 1H
X_freq         = 399.78219838 [Mhz]
X_offset       = 5 [ppm]
X_points       = 14384
X_resolution   = 0.73218757 [Hz]
X_sweep        = 11.99616123 [kHz]
irf_domain     = 1H
irf_freq       = 399.78219838 [Mhz]
irf_offset     = 5 [ppm]
Tri_domain     = 1H
Tri_freq       = 299.78219838 [Mhz]
Tri_offset     = 5 [ppm]
Clipped        = FALSE
Mod_return     = 1
Scale          = 16
Total_scans    = 16

X_90_width     = 11.57[us]
X_acq_time     = 1.36577024[s]
X_angle        = 45[deg]
X_atn          = 5[dB]
X_pulse        = 5.785[us]
irf_mode       = off
Tri_mode       = off
Date_preset    = FALSE
Initial_wait   = 1[s]
Recvr_gain     = 35
Relaxation_delay = 4[s]
Repetition_time = 5.36577024[s]
Temp_get       = 21.4 [dC]
  
```

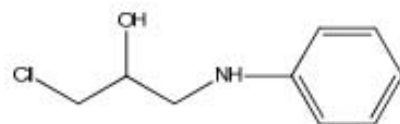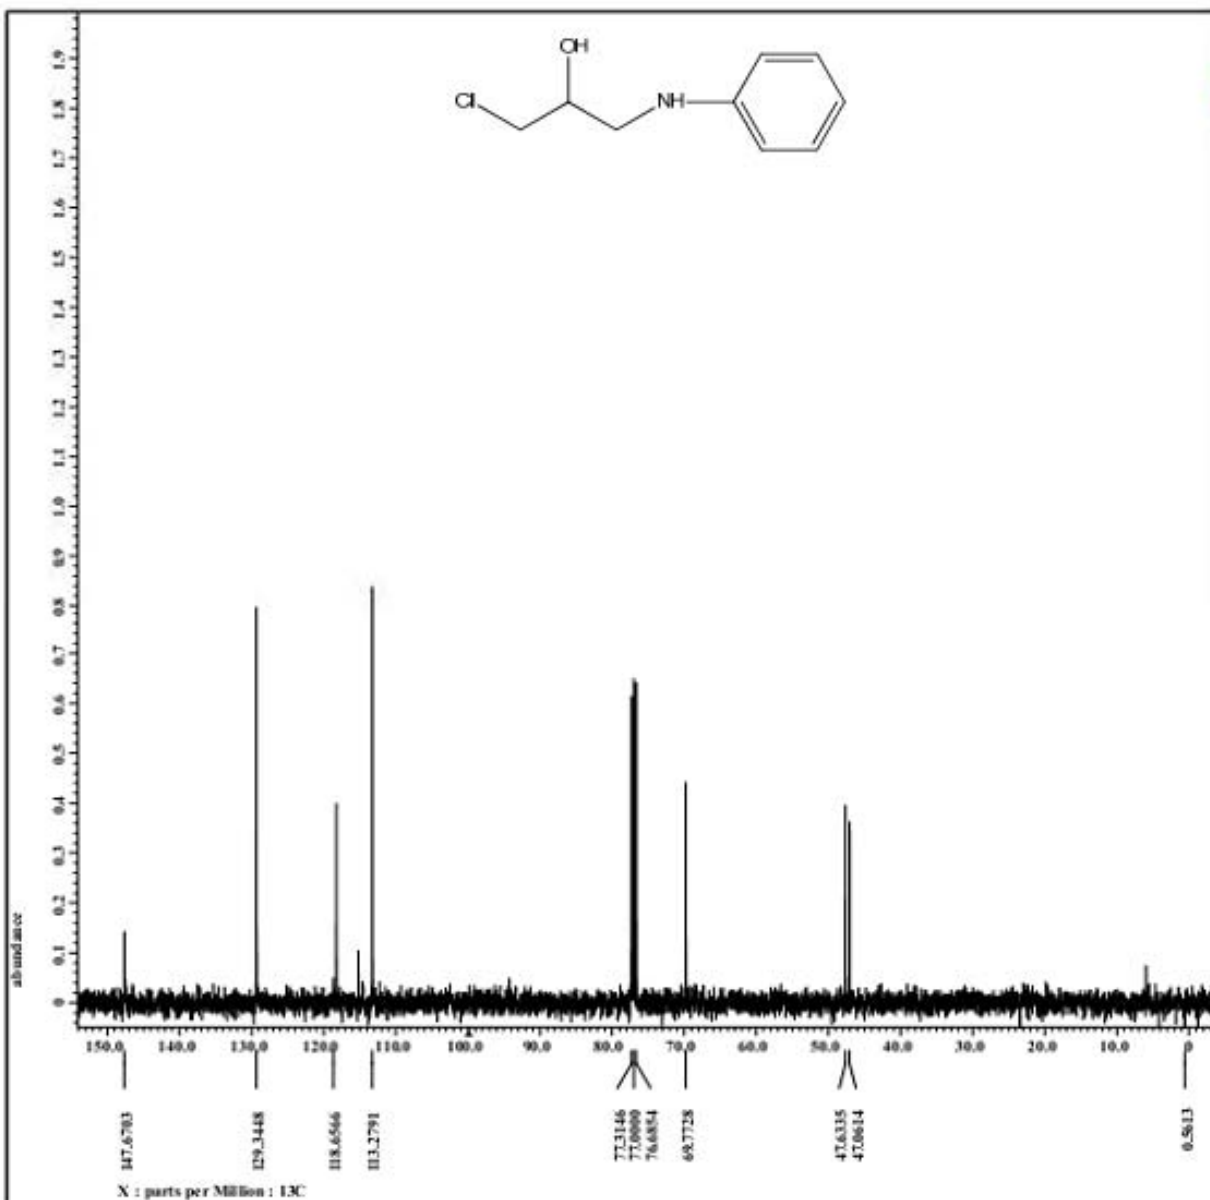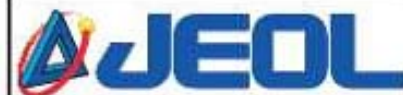

```

Filename      = 55_3-8-EP1_CANDON-4.j
Author        = delta
Experiment    = single_pulse_dec
Sample id     = 55_3-8-EP1
Solvent       = CHLOROFORM-D
Creation time  = 27-OCT-2011 18:16:11
Revision time = 29-JUL-2012 16:07:19
Current Time  = 29-JUL-2012 16:07:40

Comment       = 55_3-8-EP1
Data format   = 1D COMPLEX
Dir_size      = 26214
Dir_title     = 13C
Dir_units     = [ppm]
Dimensions    = X
Site          = KCX 400P
Spectrometer  = DELTA2_MK2

Field strength = 9.389766[?] (400[Mhz])
X_acq_duration = 1.0433312[s]
X_delay        = 13C
X_delay_time   = 100.52530333 [Mhz]
X_offset       = 100[ppm]
X_points       = 32768
X_prescans     = 4
X_resolution   = 0.95846665[Hz]
X_sweep        = 31.40703518 [kHz]
f1r_domain     = 1H
f1r_freq       = 399.78219838 [Mhz]
f1r_offset     = 5[ppm]
Clipped        = FALSE
Max_sweep     = 1
Solve         = 14
Total_scans    = 14

X_90_width     = 11.75[us]
X_acq_time      = 1.0433312[s]
X_angle         = 30[deg]
X_atn           = 10[db]
X_pulse         = 3.91666667[us]
f1r_atn_dec     = 24.95[db]
f1r_atn_noise   = 24.95[db]
f1r_noise       = NONE
Decoupling      = NONE
Initial_wait    = 1[s]
Noise           = NONE
Noise time     = 2[s]
Recvr_gain      = 58
Relaxation_delay = 2[s]
Repetition_time = 1.0433312[s]
Temp_get        = 22.6 [dC]
  
```

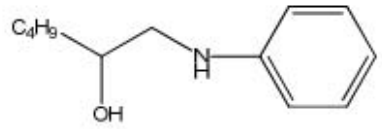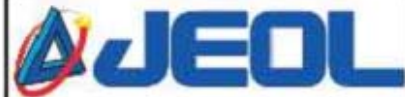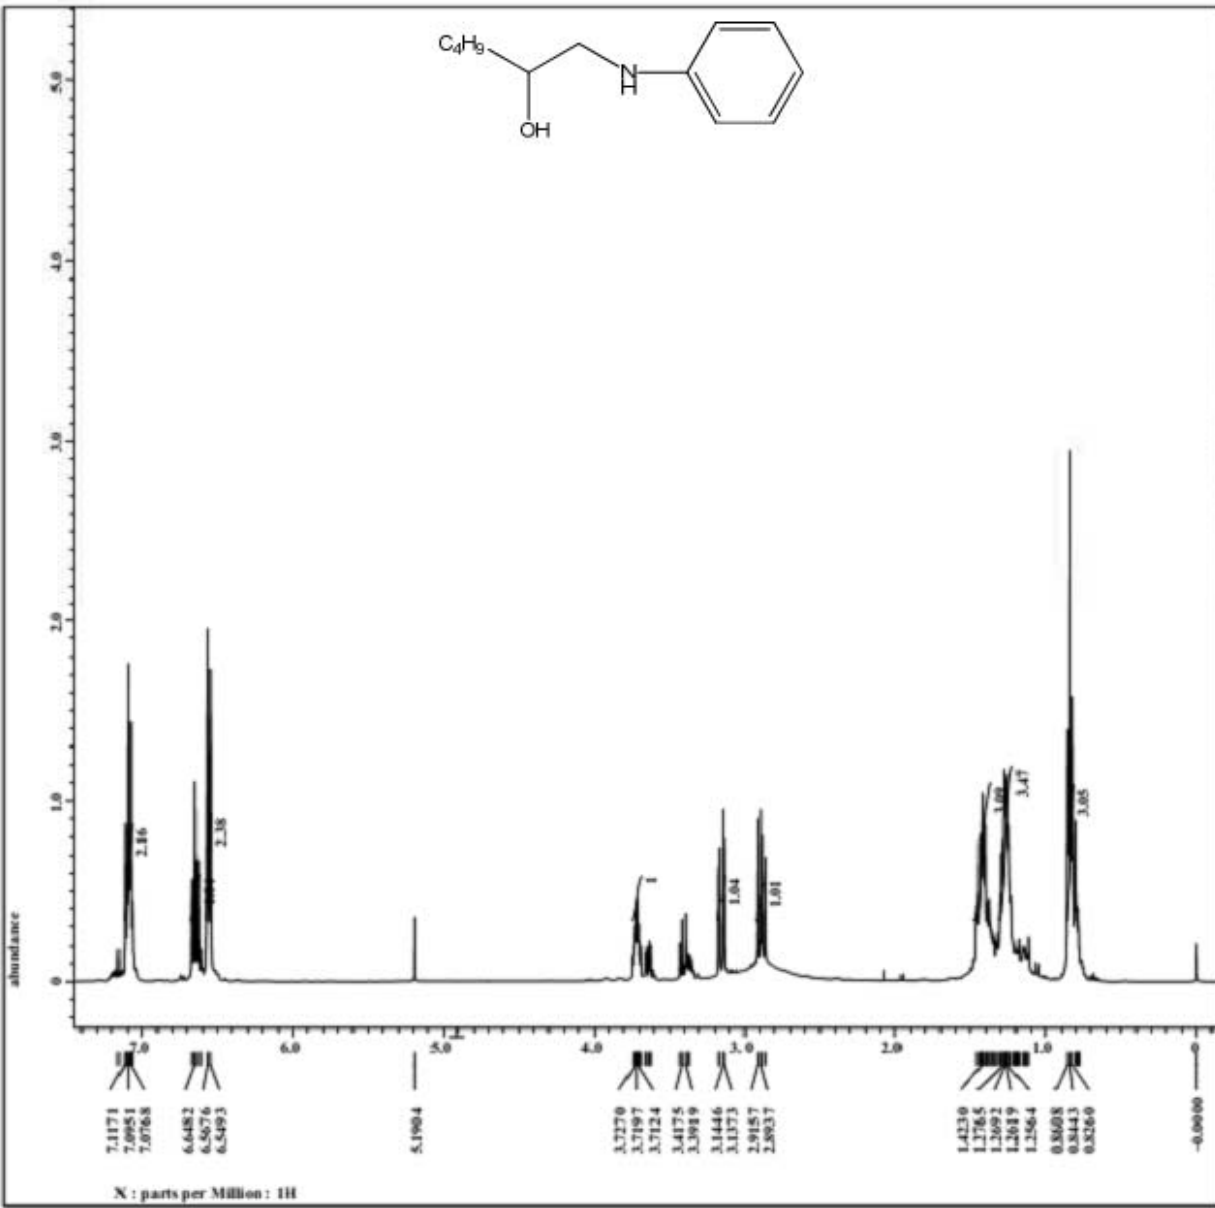

```

Filename      = SS EHAM_PROTON-4.jdf
Author       = delta
Experiment   = single_pulse.ex2
Sample_id    = SS EHAM
Solvent      = CHLOROFORM-D
Creation_time = 9-AUG-2012 14:39:36
Revision_time = 11-AUG-2012 09:14:12
Current_time  = 11-AUG-2012 09:37:38

Comment      = SS EHAM
Data_format  = 1D COMPLEX
Dim_size     = 13107
Dim_title    = 1H
Dim_units    = [ppm]
Dimensions   = K
Site         = MZX 400P
Spectrometer = DELTA2_800

Field_strength = 9.389766[T] (400 [MHz])
X_acq_duration = 1.36577024[s]
X_domain       = 1H
X_freq         = 399.78219838 [MHz]
X_offset       = 5 [ppm]
X_points       = 16384
X_procscans   = 1
X_resolution   = 0.73218757 [Hz]
X_sweep        = 11.99616123 [kHz]
IR_domain     = 1H
IR_freq        = 399.78219838 [MHz]
IR_offset      = 5 [ppm]
TR1_domain     = 1H
TR1_freq       = 399.78219838 [MHz]
TR1_offset     = 5 [ppm]
Clipped        = FALSE
Mod_return     = 1
Scans          = 16
Total_scans    = 16

X_90_width    = 11.57 [us]
X_acq_time    = 1.36577024 [s]
X_angle       = 45 [deg]
X_atn         = 5 [dB]
X_pulse       = 5.785 [us]
IRF_mode      = Off
TR1_mode      = Off
Data_preset   = FALSE
Initial_wait  = 1 [s]
Recvr_gain    = 26
Relaxation_delay = 4 [s]
Repetition_time = 5.36577024 [s]
Temp_get      = 22.8 [dC]
  
```

X : parts per Million : 1H

SS\_EXHX\_CARBON-3.jdr

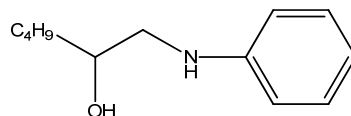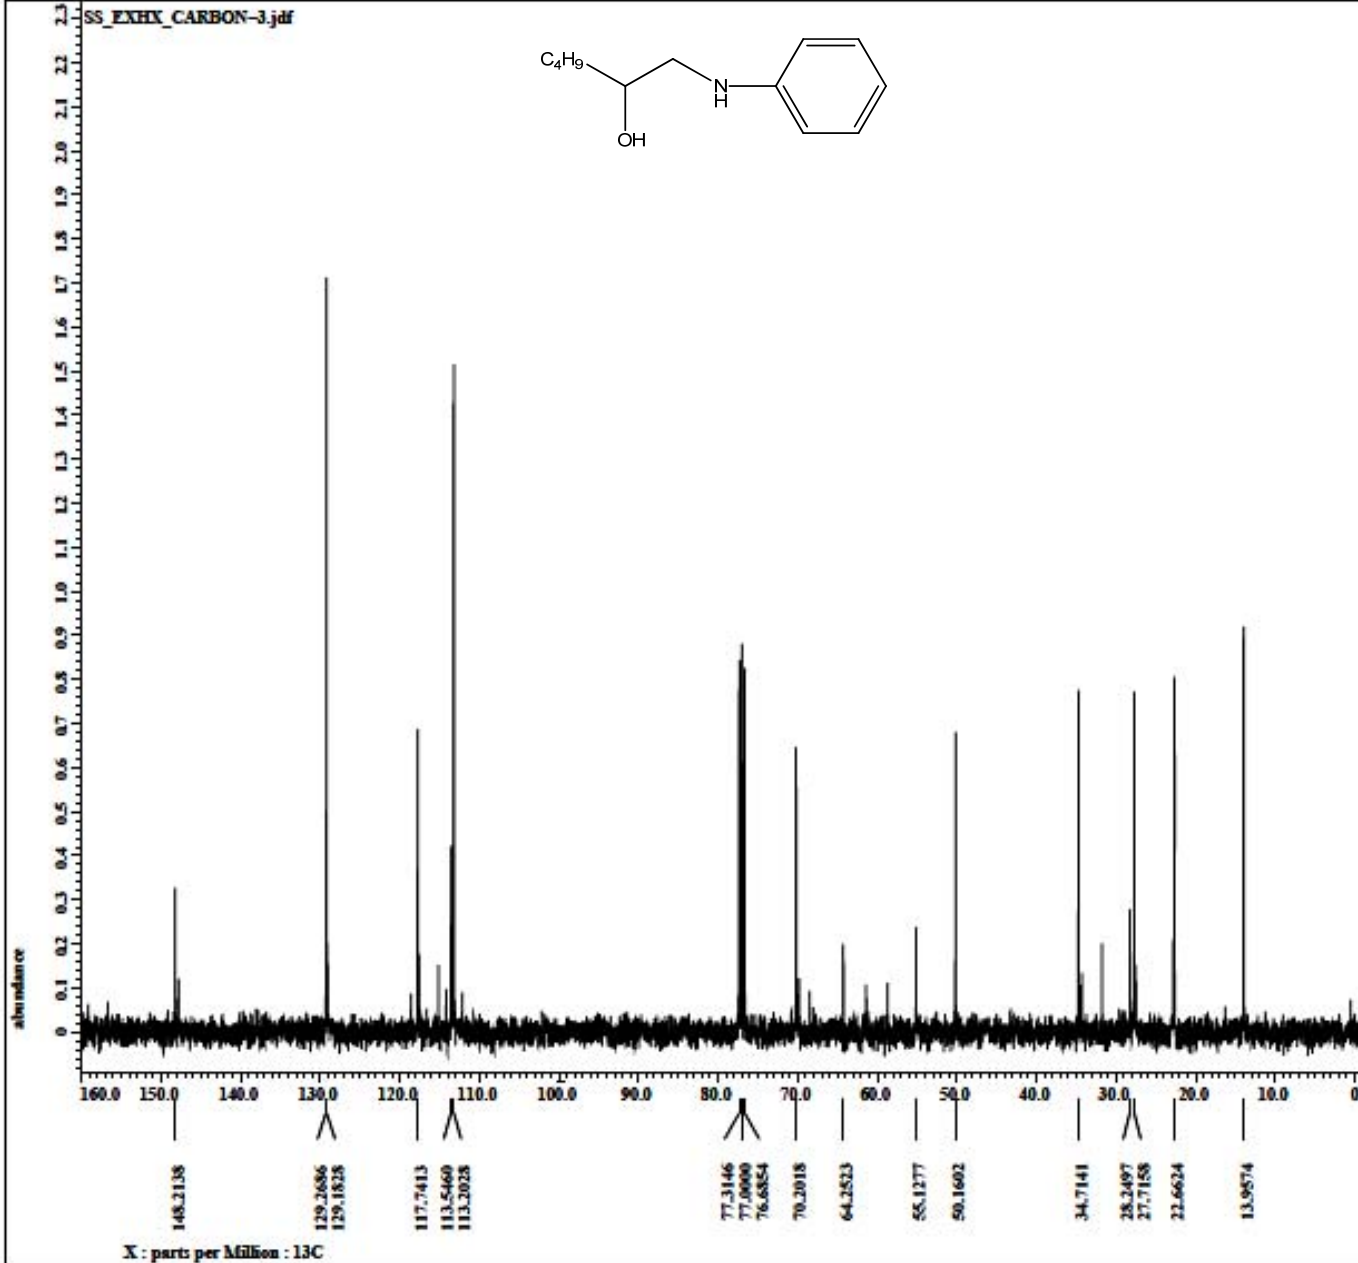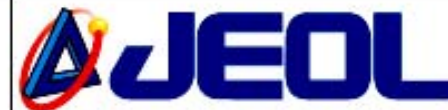

Filename = SS\_EXHX\_CARBON-3.jdr  
Author = delta  
Experiment = single pulse dec  
Sample id = SS\_EXHX  
Solvent = CHLOROFORM-D  
Creation time = 3-JAN-2012 23:03:00  
Revision time = 3-JAN-2012 23:05:34  
Current time = 11-JAN-2012 16:56:40

Comment = SS\_EXHX  
Data format = 1D COMPLEX  
Dim size = 26214  
Dim title = 13C  
Dim units = [ppm]  
Dimensions = 1  
Site = RCX 400P  
Spectrometer = DELTA2\_NMR

Field strength = 9.389766 [T] (400 [MHz])  
X acq duration = 1.04333312 [s]  
X domain = 13C  
X freq = 100.52530333 [MHz]  
X offset = 100 [ppm]  
X points = 32768  
X prescans = 4  
X resolution = 0.95846665 [Hz]  
X sweep = 31.40703518 [kHz]  
Irr domain = 1H  
Irr freq = 399.78219838 [MHz]  
Irr offset = 5 [ppm]  
Clipped = FALSE  
Mod return = 1  
Scans = 14  
Total scans = 14

X 90 width = 11.75 [us]  
X acq time = 1.04333312 [s]  
X angle = 30 [deg]  
X atn = 10 [dB]  
X pulse = 3.91666667 [us]  
Irr atn dec = 24.95 [dB]  
Irr atn noe = 24.95 [dB]  
Irr noise = WALTZ  
Decoupling = TRUR  
Initial wait = 1 [s]  
Noe = TRUE  
Noe time = 2 [s]  
Recvr gain = 60  
Relaxation delay = 2 [s]  
Repetition time = 3.04333312 [s]  
Temp get = 22.2 [dC]



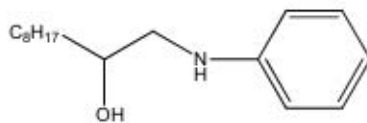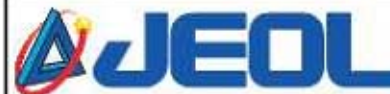

Filename = SS\_ED-H\_PROTON-4.jdf  
 Author = delta  
 Experiment = single\_pulse.ex2  
 Sample\_id = SS\_ED-H  
 Solvent = CHLOROFORM-D  
 Creation\_time = 3-AUG-2012 17:13:05  
 Revision\_time = 11-AUG-2012 10:03:08  
 Current\_time = 11-AUG-2012 10:03:24

Comment = SS ED-H  
 Data\_format = 1D\_COMPLEX  
 Dim\_size = 13107  
 Dim\_title = 1H  
 Dim\_units = [ppm]  
 Dimensions = X  
 Site = ECX 400P  
 Spectrometer = DELTA2\_SMR

Field\_strength = 9.389766[T] (400[MHz])  
 X\_acq\_duration = 1.36577024[s]  
 X\_domain = 1H  
 X\_freq = 399.78219838[MHz]  
 X\_offset = 5[ppm]  
 X\_points = 16384  
 X\_prescans = 1  
 X\_resolution = 0.73218757[Hz]  
 X\_sweep = 11.99616123[kHz]  
 Iir\_domain = 1H  
 Iir\_freq = 399.78219838[MHz]  
 Iir\_offset = 5[ppm]  
 Tri\_domain = 1H  
 Tri\_freq = 399.78219838[MHz]  
 Tri\_offset = 5[ppm]  
 Clipped = FALSE  
 Mod\_return = 1  
 Scans = 16  
 Total\_scans = 16

X\_90\_width = 11.57[us]  
 X\_acq\_time = 1.36577024[s]  
 X\_angle = 45[deg]  
 X\_atn = 5[dB]  
 X\_pulse = 5.785[us]  
 Iir\_mode = Off  
 Tri\_mode = Off  
 Dante\_preset = FALSE  
 Initial\_wait = 1[s]  
 Recvr\_gain = 22  
 Relaxation\_delay = 4[s]  
 Repetition\_time = 5.36577024[s]  
 Temp\_get = 19.2[C]

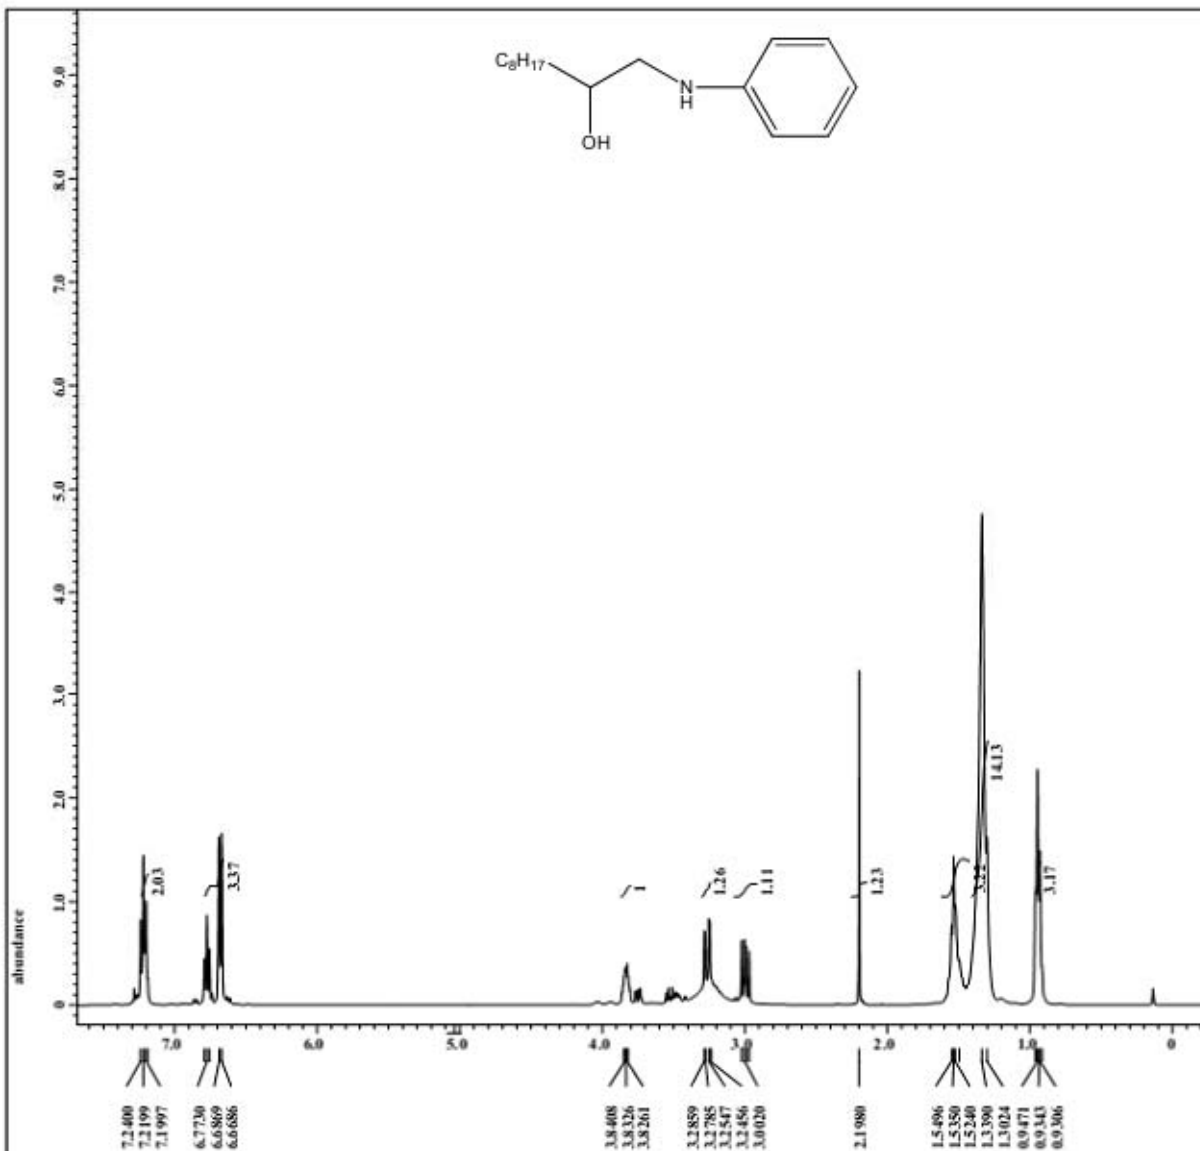

X : parts per Million : 1H

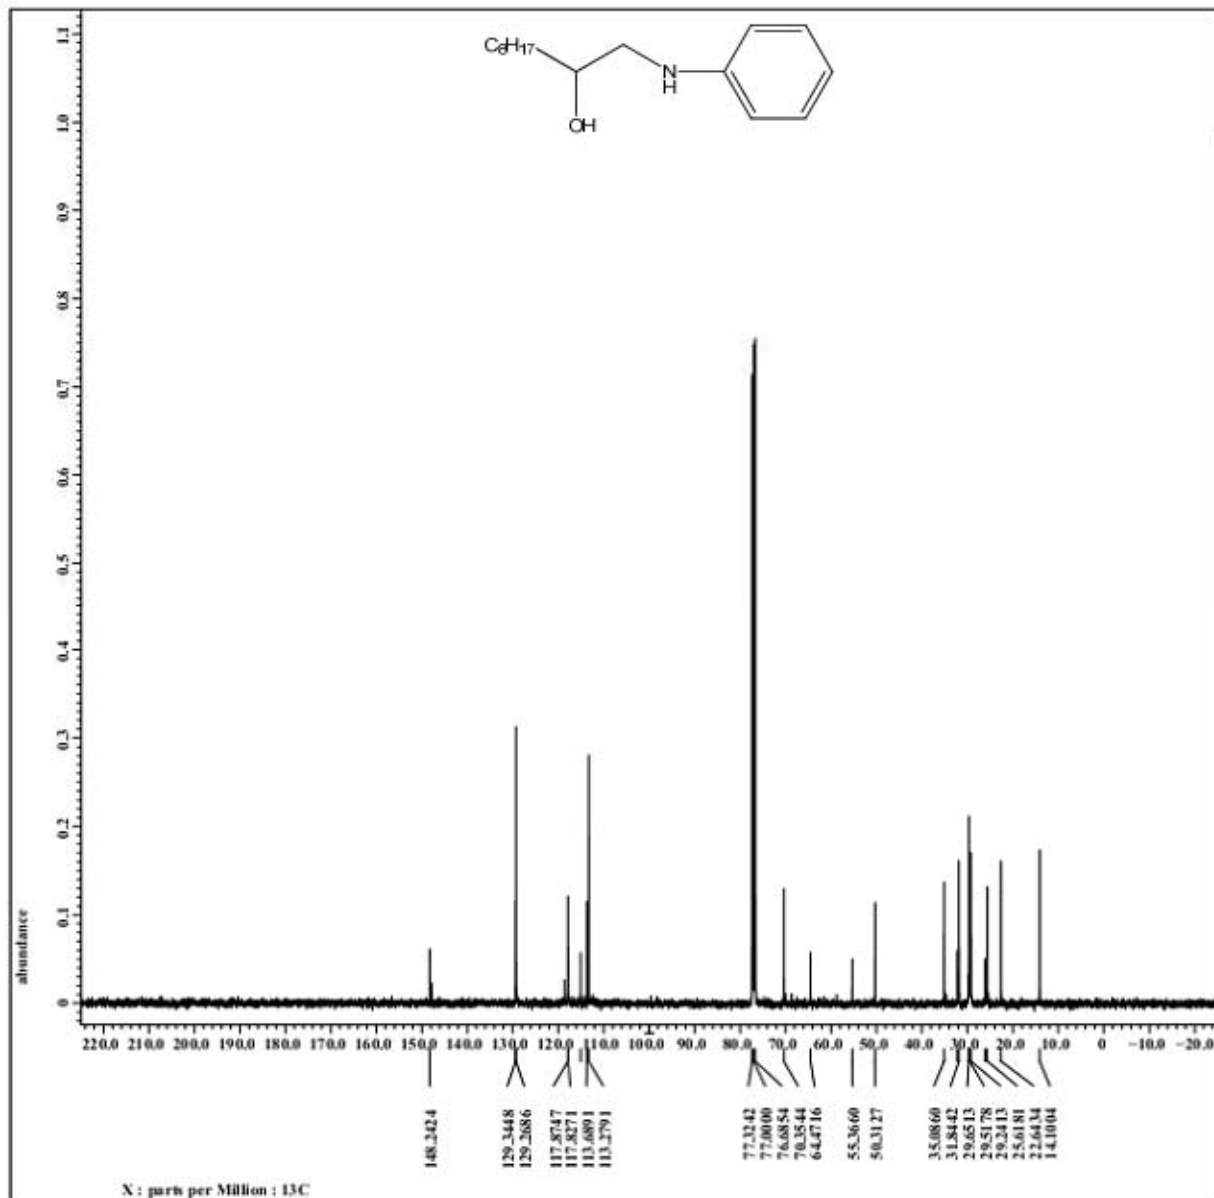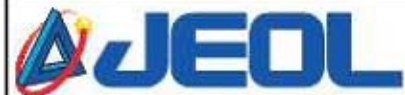

Filename = SS\_EXDC\_CARBON-3.jdf  
 Author = delta  
 Experiment = single\_pulse\_dec  
 Sample\_id = SS\_EXDC  
 Solvent = CHLOROFORM-D  
 Creation\_time = 3-JAN-2012 22:57:24  
 Revision\_time = 3-JAN-2012 22:59:58  
 Current\_time = 11-AGO-2012 10:54:12

Comment = SS\_EXDC  
 Data\_format = 1D\_COMPLEX  
 Dim\_size = 26214  
 Dim\_title = 13C  
 Dim\_units = [ppm]  
 Dimensions = X  
 Site = ECK 400P  
 Spectrometer = DELTA2\_NMR

Field\_strength = 9.389766[T] (400[Mhz])  
 X\_acq\_duration = 1.04333312[s]  
 X\_domain = 13C  
 X\_freq = 100.52530333[Mhz]  
 X\_offset = 100[ppm]  
 X\_points = 32768  
 X\_prescans = 4  
 X\_resolution = 0.95846665[Hz]  
 X\_sweep = 31.40703518[kHz]  
 Irr\_domain = 1H  
 Irr\_freq = 399.78219838[Mhz]  
 Irr\_offset = 5[ppm]  
 Clipped = FALSE  
 Mod\_return = 1  
 Scans = 750  
 Total\_scans = 750

X\_90\_width = 11.75[us]  
 X\_acq\_time = 1.04333312[s]  
 X\_angle = 30[deg]  
 X\_atn = 10[db]  
 X\_pulse = 3.91666667[us]  
 Irr\_atn\_dec = 24.95[db]  
 Irr\_atn\_noe = 24.95[db]  
 Irr\_noise = WALTZ  
 Decoupling = TRUE  
 Initial\_wait = 1[s]  
 Noe = TRUE  
 Noe\_time = 2[s]  
 Recvr\_gain = 60  
 Relaxation\_delay = 2[s]  
 Repetition\_time = 3.04333312[s]  
 Temp\_get = 21.9[dc]



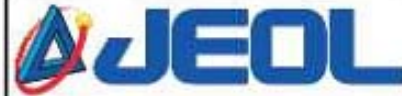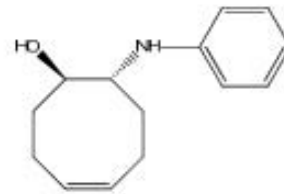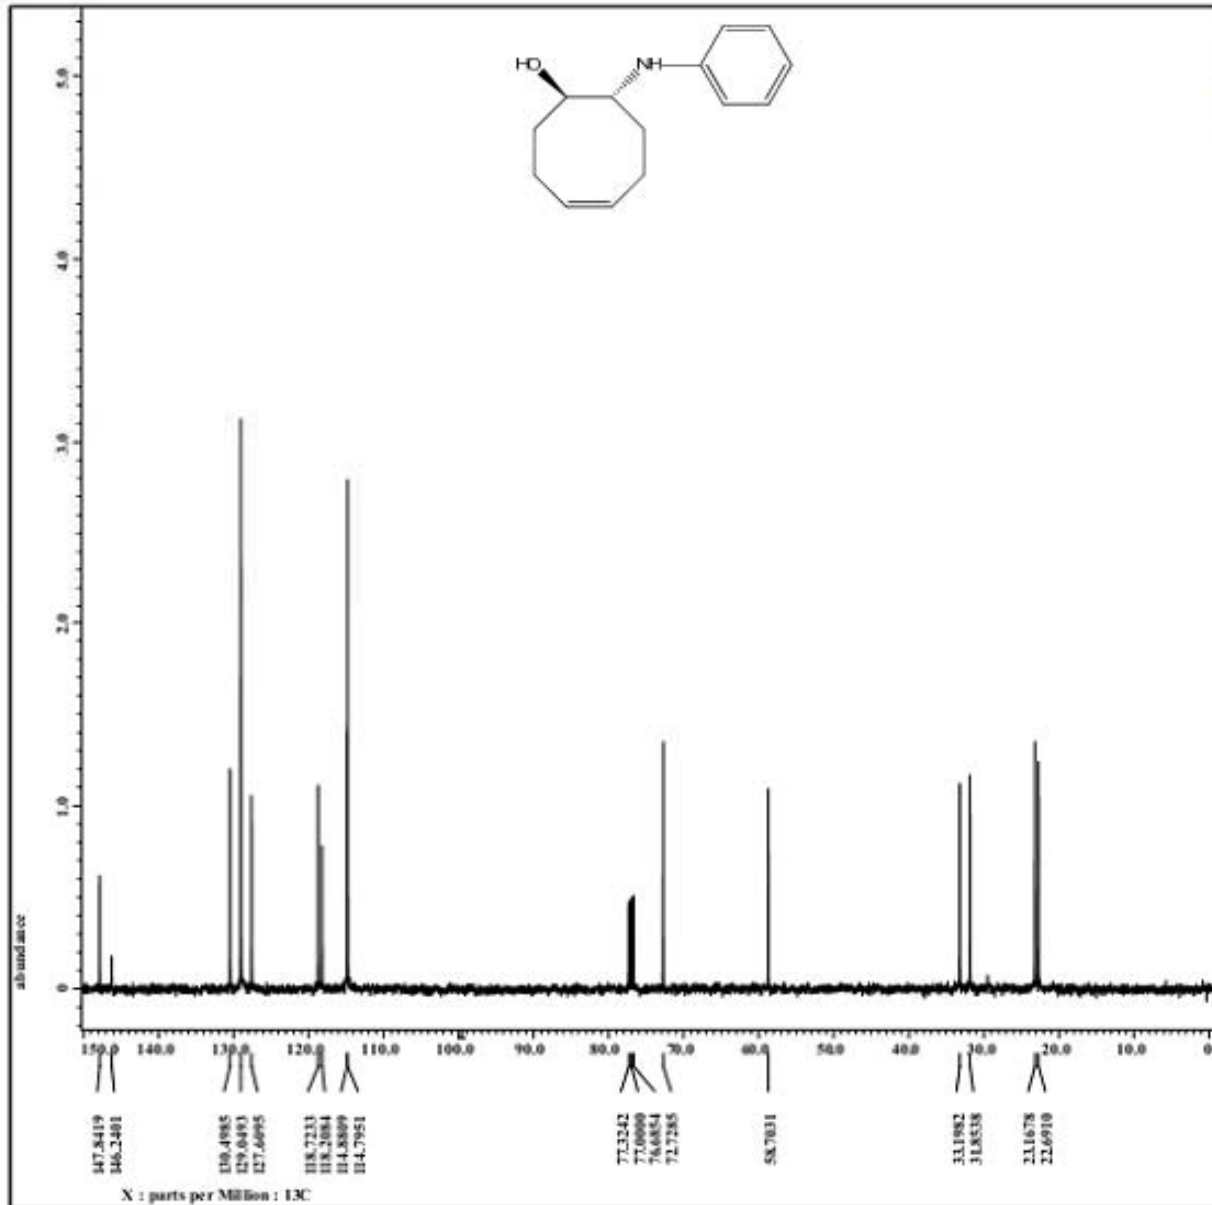

```
Filename      = FR_3-12C_CARRION-3.jdf
Author       = delta
Experiment   = single_pulse_dec
Sample id    = FR_3-12C
Solvent      = CHLOROFORM-D
Creation_time = 5-JAN-2012 15:24:03
Revision_time = 5-JAN-2012 15:26:36
Current_time = 29-JUL-2012 17:04:35

Comment      = FR_3-12C
Data_format  = 1D_COMPLEX
Dir_size     = 26214
Dir_title    = 12C
Dir_units    = [ppm]
Dimensions   = X
Site         = SUX 400P
Spectrometer = DELTA2_NMR

Field_strength = 9.389766[T] (400[Mhz])
X_acq_duration = 1.04333312[s]
X_domain       = 12C
X_freq         = 100.52530333[Mhz]
X_offset      = 100[ppm]
X_points       = 32768
X_prescans    = 4
X_resolution  = 0.95846665[Hz]
X_sweep        = 31.40703518[kHz]
IFR_domain     = 1H
IFR_freq       = 399.78219838[Mhz]
IFR_offset     = 5[ppm]
Clipped        = FALSE
Mod_ex_time    = 1
Scans          = 14
Total_scans    = 14

X_90_width    = 11.75[us]
X_acq_time     = 1.04333312[s]
X_angle        = 30[deg]
X_atn          = 10[db]
X_pulse        = 3.91666667[us]
IFR_atn_dec    = 24.95[db]
IFR_atn_pow    = 24.95[db]
IFR_noise      = WALTZ
Decoupling     = THM
Initial_wait   = 1[s]
Noe            = THM
Noe_time       = 2[s]
RecVr_gain     = 58
Relaxation_delay = 2[s]
Repetition_time = 3.04333312[s]
Temp_get       = 22.2[degC]
```

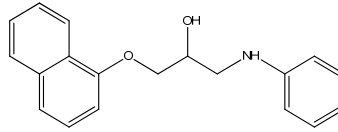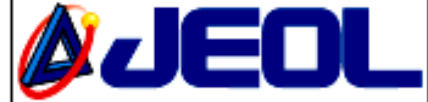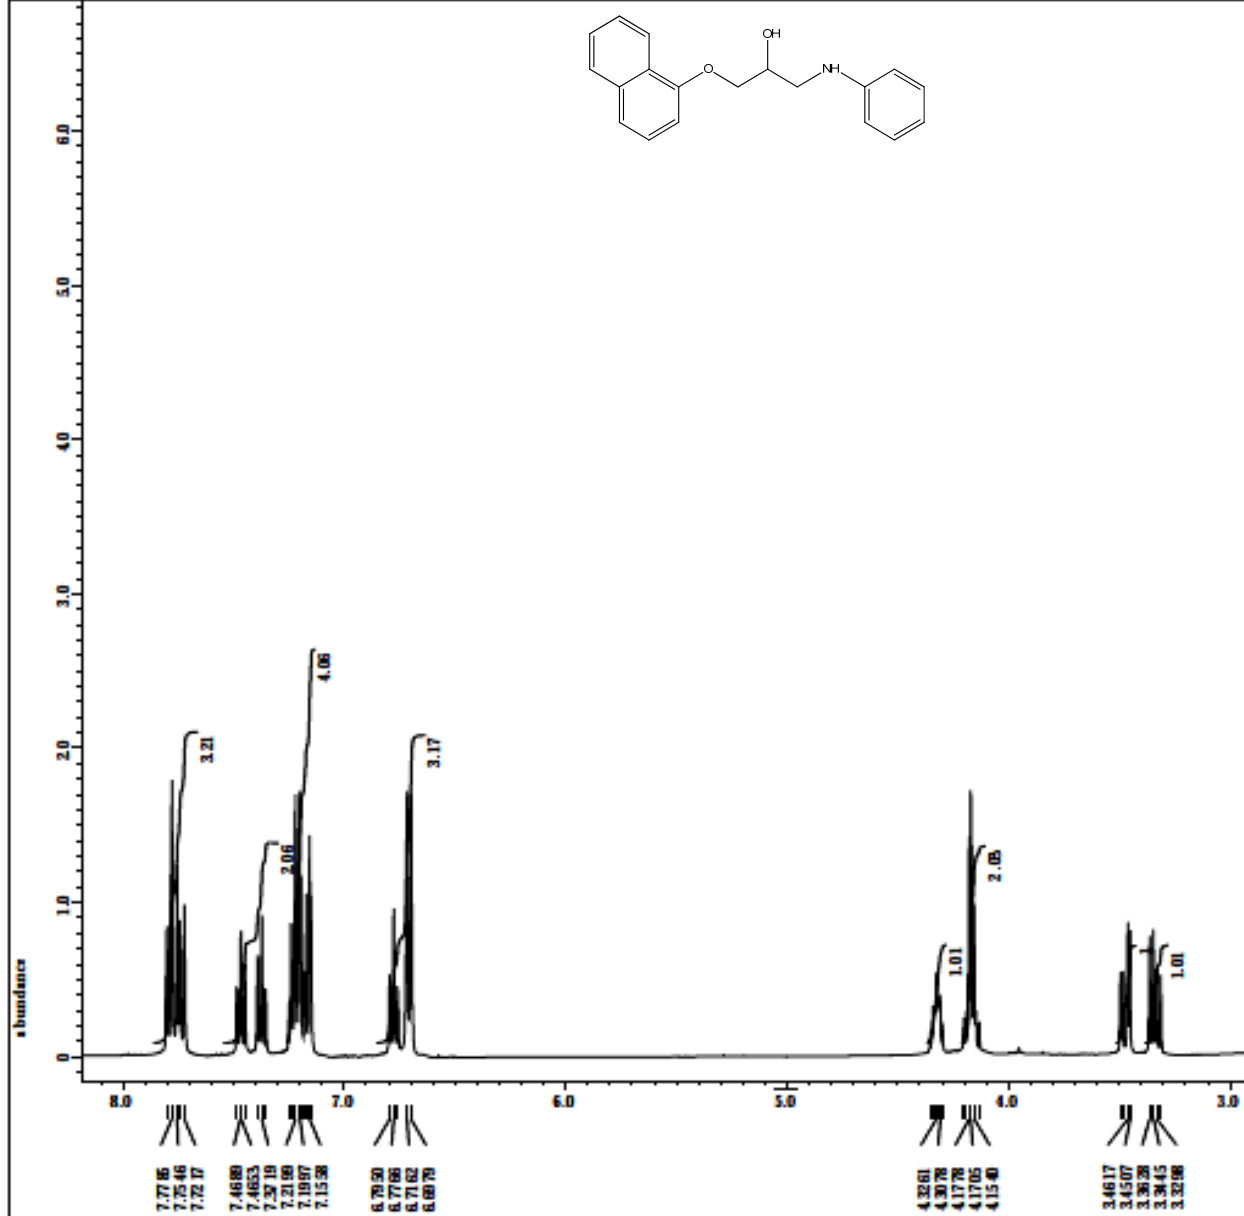

X : parts per Million : 1H

```

File name      = FK 4-16A_PROTON-4.jdt
Author         = Delta
Experiment     = single pulse.scf
Sample id      = FK 4-16A
Solvent        = CHLOROFORM-D
Creation time   = 25-AUG-2012 16:36:29
Revision time  = 17-APR-2014 12:47:32
Current time   = 17-APR-2014 12:47:59

Comment       = FK 4-16A
Data format    = 1D COMPLEX
Data size      = 13107
Data title     = 1H
Data units     = [ppm]
Dimensions     = 1
Site           = KCI 400P
Spectrometer   = DELTA2_NMR

Field strength = 9.389766 [T] (400 [MHz])
F1 acq duration = 1.36377024 [s]
F1 domain      = 1H
F1 freq         = 399.78219838 [MHz]
F1 offset      = 5 [ppm]
F1 points      = 16384
F1 prescans    = 1
F1 resolution  = 0.73218757 [Hz]
F1 sweep       = 11.99416123 [kHz]
Irr domain     = 1H
Irr freq       = 399.78219838 [MHz]
Irr offset     = 5 [ppm]
Tri domain     = 1H
Tri freq       = 399.78219838 [MHz]
Tri offset     = 5 [ppm]
Clipped        = FALSE
Mod return     = 1
Scale          = 16
Total scans    = 16

F2 90 width    = 11.57 [us]
F2 acq time    = 1.36377024 [s]
F2 angle       = 45 [deg]
F2 atm         = 5 [dB]
F2 pulse       = 5.785 [us]
Irr mode       = Off
Tri mode       = Off
Delta preset   = FALSE
Initial wait   = 1 [s]
Recvr gain     = 30
Relaxation delay = 4 [s]
Repetition time = 5.36377024 [s]
Temp get       = 21.1 [dC]
  
```

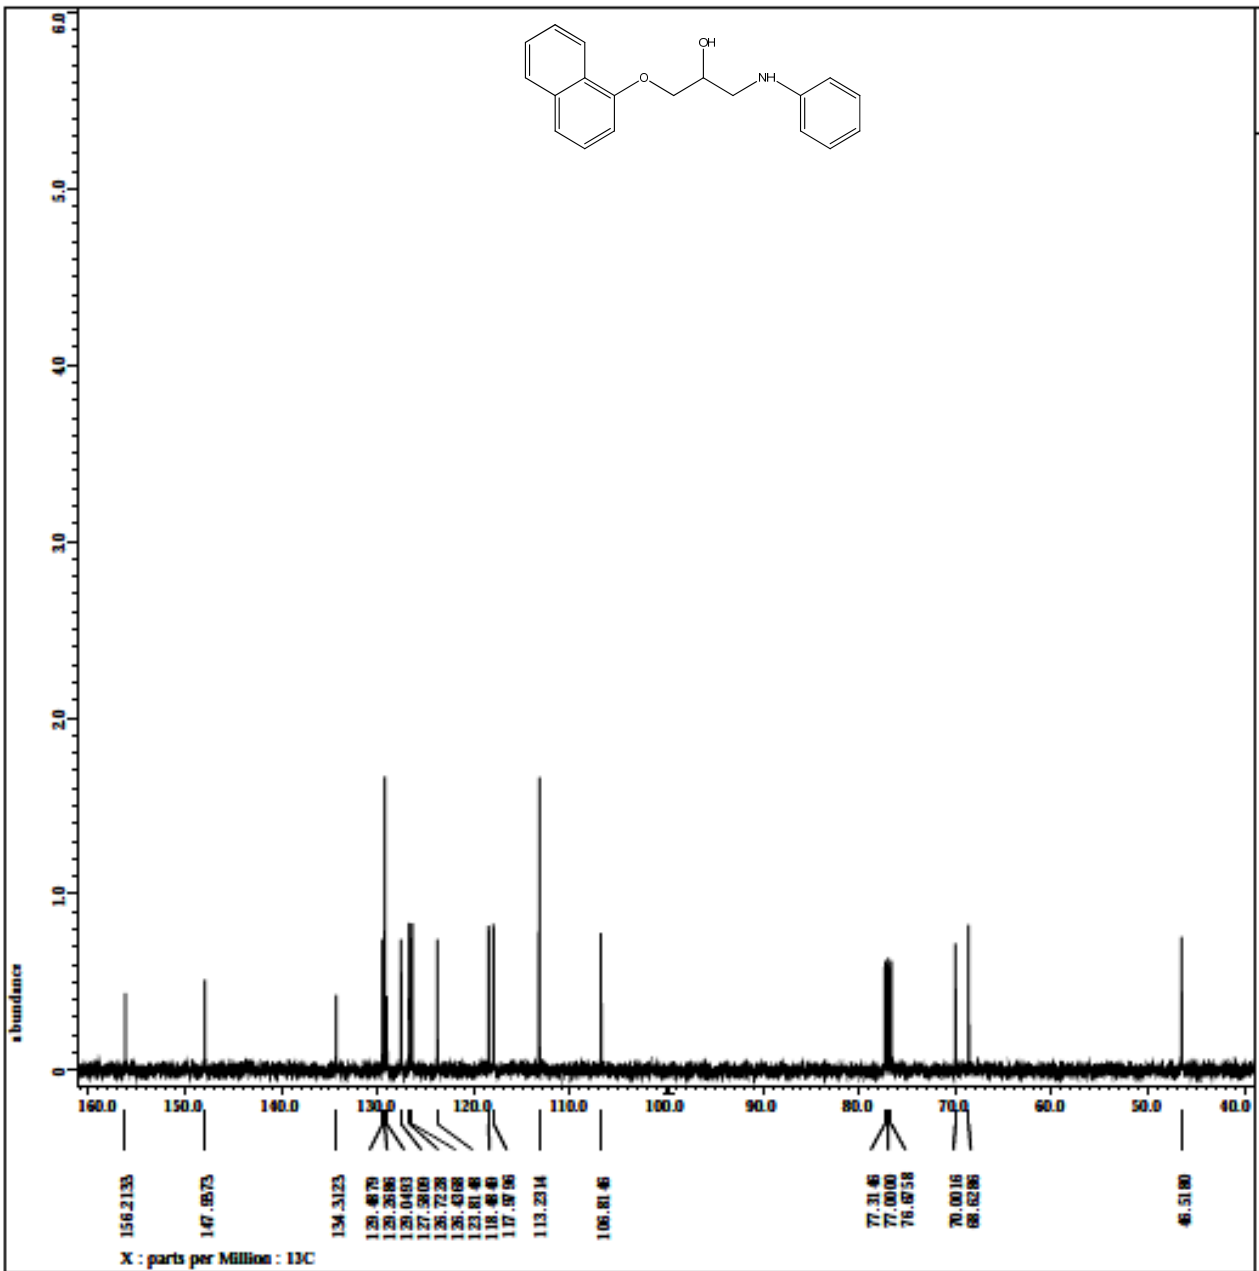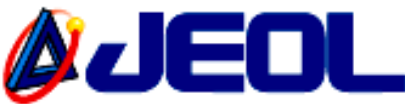

```

File Name      = FX 4-16C_CARBON-3.jdf
Author        = delta
Experiment    = single pulse dec
Sample id     = FX 4-16C
Solvent       = CDCl3/DMSO-D
Creation time = 26-AUG-2012 01:43:01
Revision time = 26-AUG-2012 02:02:54
Current time  = 17-APR-2014 12:48:41

Comment       = FX 4-16C
Data format   = 1D COMPLEX
Dir size      = 26214
Dir title     = 13C
Dir units     = [ppm]
Dimensions    = 2
Site         = ECI 400P
Spectrometer  = DELTA2_HMR

Field strength = 9.389766 [T] (400 [MHz])
F1 acq duration = 1.04333312 [s]
F1 domain      = 13C
F1 freq        = 100.62530333 [MHz]
F1 offset      = 100 [ppm]
F1 points      = 32763
F1 prescans    = 4
F1 resolution  = 0.95846665 [Hz]
F1 sweep       = 31.40703518 [kHz]
Irr domain     = 1H
Irr freq       = 399.78219838 [MHz]
Irr offset     = 5 [ppm]
Clipped       = FALSE
Mod return     = 1
Scale         = 14
Total scans    = 14

F2 90 width    = 11.75 [us]
F2 acq time    = 1.04333312 [s]
F2 angle       = 30 [deg]
F2 atm         = 10 [dB]
F2 pulse       = 3.91666667 [us]
Irr atm dec    = 24.93 [dB]
Irr atm noc   = 24.93 [dB]
Irr noise      = WALTZ
Decoupling     = TRUE
Initial wait   = 1 [s]
Noe            = TRUE
Noe time       = 2 [s]
Recvr gain     = 58
Relaxation delay = 2 [s]
Repetition time = 3.04333312 [s]
Temp get       = 21.2 [degC]
  
```

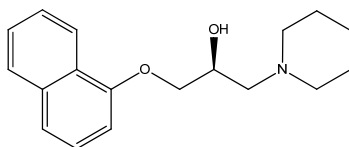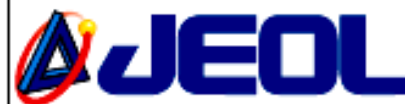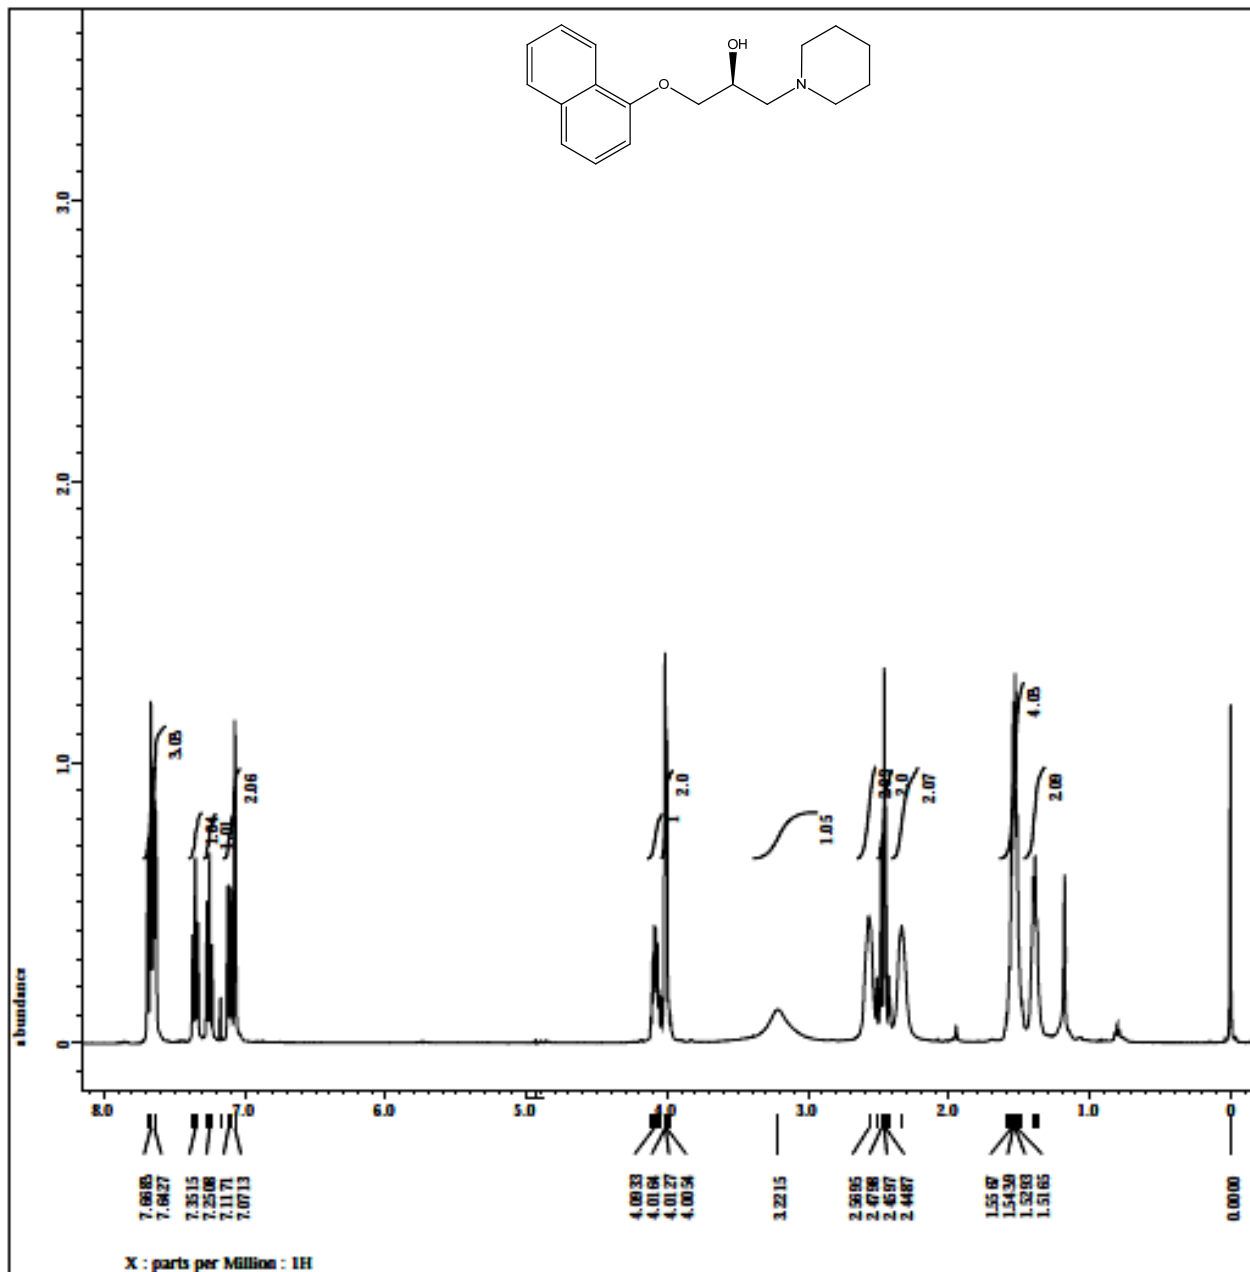

```

File Name      = SS 3-15PR_PROTON-4.jd
Author        = Delta
Experiment    = single pulse.scf
Sample id     = SS 3-15PR
Solvent       = CHLOROFORM-D
Creation time  = 11-JUN-2012 09:46:38
Revision time = 15-APR-2014 16:04:50
Current time  = 15-APR-2014 16:05:15

Comment       = SS 3-15PR
Data format   = 1D COMPLEX
Data size     = 13107
Data title    = 1H
Data units    = [ppm]
Dimensions    = 1
Site          = KCI 400P
Spectrometer  = DELTA2_NMR

Field strength = 9.389766 [T] (400 [MHz])
F1 acq duration = 1.36577024 [s]
F1 domain      = 1H
F1 freq        = 399.78219838 [MHz]
F1 offset      = 5 [ppm]
F1 points      = 16384
F1 prescans    = 1
F1 resolution  = 0.73218757 [Hz]
F1 sweep       = 11.99416123 [kHz]
Irr domain     = 1H
Irr freq       = 399.78219838 [MHz]
Irr offset     = 5 [ppm]
Tri domain     = 1H
Tri freq       = 399.78219838 [MHz]
Tri offset     = 5 [ppm]
Clipped       = FALSE
Mod return     = 1
Scans         = 16
Total scans    = 16

X 90 width     = 11.57 [us]
X acq time     = 1.36577024 [s]
X angle        = 45 [deg]
X atm         = 5 [dB]
X pulse       = 5.785 [us]
Irr mode       = Off
Tri mode       = Off
Delta preset   = FALSE
Initial wait   = 1 [s]
Recvr gain     = 30
Relaxation delay = 4 [s]
Repetition time = 5.36577024 [s]
Temp get       = 20.3 [dC]
  
```

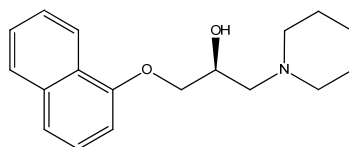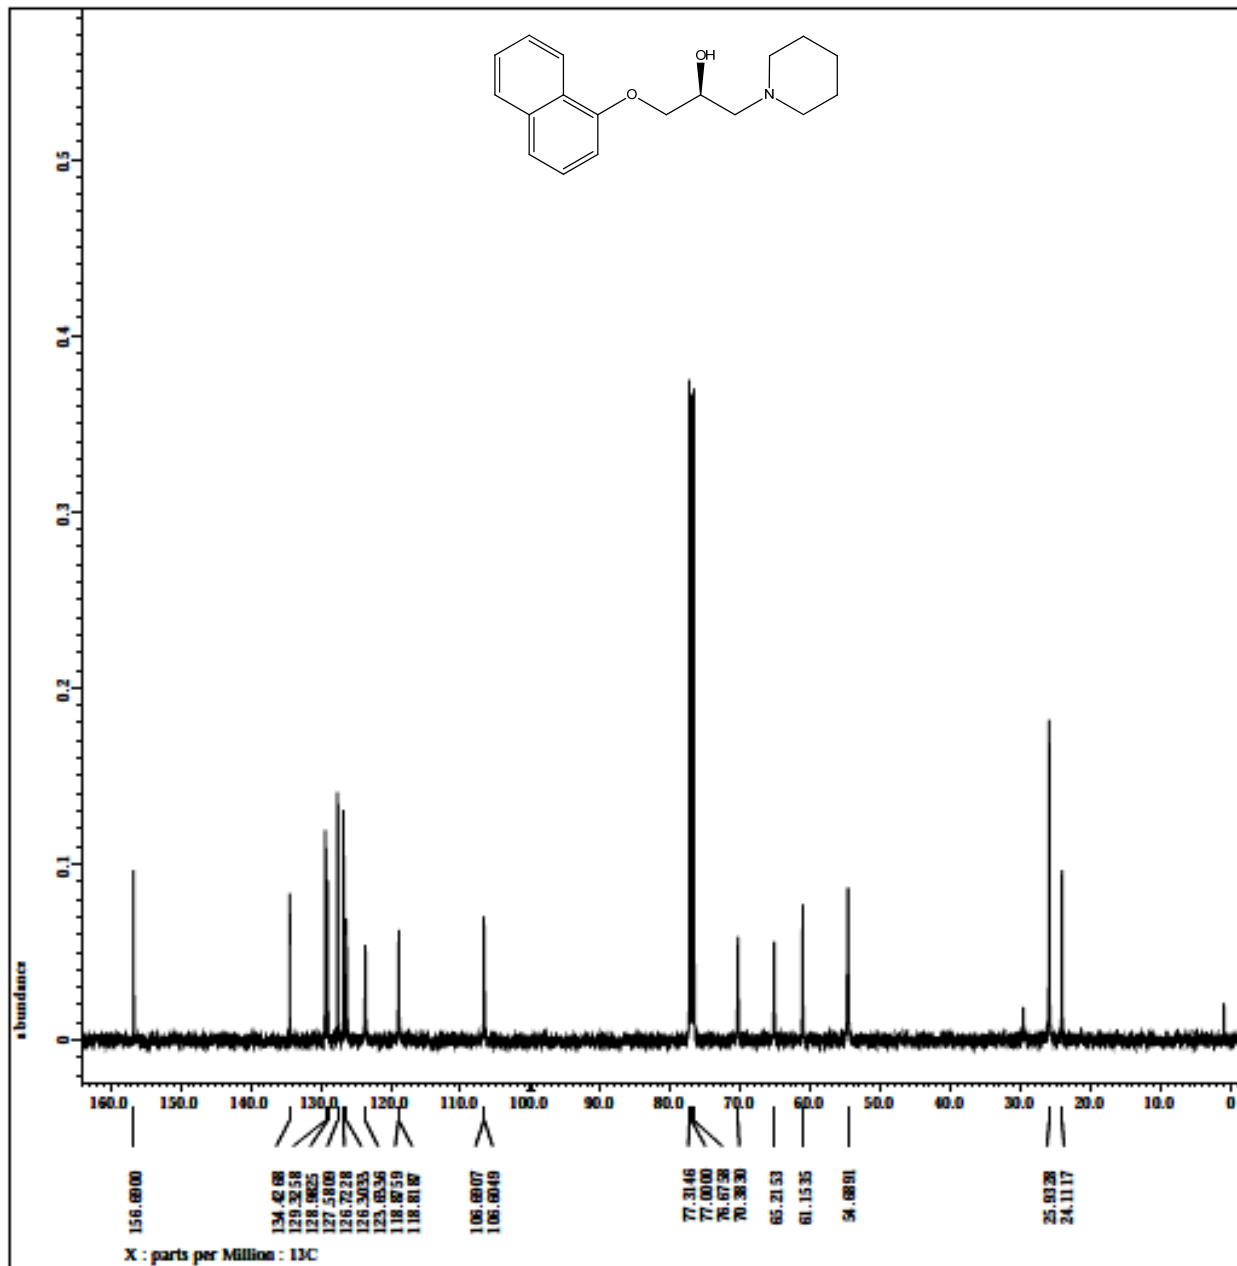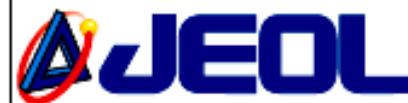

Filename = FN\_3-15PR\_CARBON-4.  
 Author = delta  
 Experiment = single pulse\_dec  
 Sample\_id = FN\_3-15PR  
 Solvent = CHLOROFORM-D  
 Creation\_time = 12-JUL-2012 22:46:30  
 Revision\_time = 15-APR-2014 22:10:24  
 Current\_time = 15-APR-2014 23:00:09

Comment = FN\_3-15PR  
 Data\_format = 1D\_COMPLEX  
 Dim\_size = 26214  
 Dim\_title = 13C  
 Dim\_units = [ppm]  
 Dimensions = 1  
 Site = NCI 400P  
 Spectrometer = DELTA2 NMR

Field\_strength = 9.389766 [T] (400 [MHz])  
 X\_acq\_duration = 1.04333312 [s]  
 X\_domain = 13C  
 X\_freq = 100.52530333 [MHz]  
 X\_offset = 100 [ppm]  
 X\_points = 32768  
 X\_prescans = 4  
 X\_resolution = 0.25846665 [Hz]  
 X\_sweep = 31.40703518 [kHz]  
 Irr\_domain = 1H  
 Irr\_freq = 399.78219838 [MHz]  
 Irr\_offset = 5 [ppm]  
 Clipped = FALSE  
 Mod\_return = 1  
 Scale = 750  
 Total\_scans = 750

X\_90\_width = 11.75 [ns]  
 X\_acq\_time = 1.04333312 [s]  
 X\_angle = 30 [deg]  
 X\_atn = 10 [dB]  
 X\_pulse = 3.91666667 [ns]  
 Irr\_atn\_dec = 24.95 [dB]  
 Irr\_atn\_noc = 24.95 [dB]  
 Irr\_noise = WALTZ  
 Decoupling = TRUE  
 Initial\_wait = 1 [s]  
 Noe = TRUE  
 Noe\_time = 2 [s]  
 Recvr\_gain = 54  
 Relaxation\_delay = 2 [s]  
 Repetition\_time = 3.04333312 [s]  
 Temp\_get = 21.7 [dC]



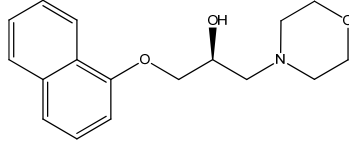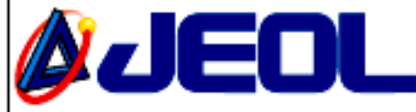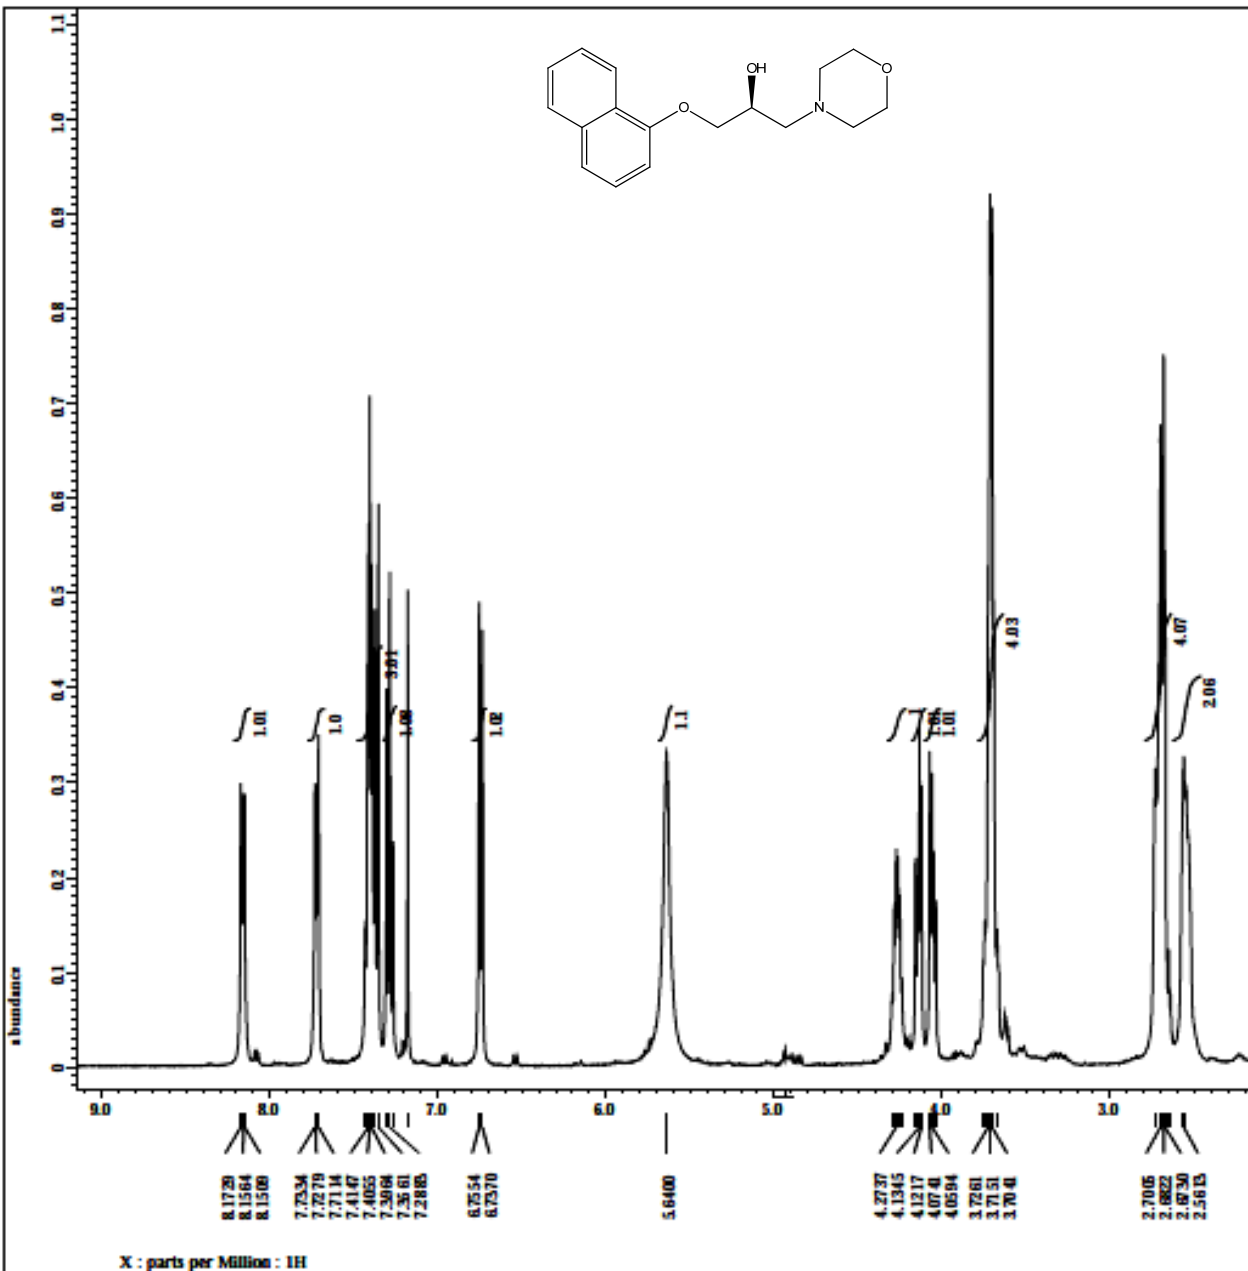

```

File name      = SS 3-15MF_PROTON-6.jd
Author         = delta
Experiment     = single pulse.sc2
Sample id      = SS 3-15MF
Solvent        = CHLOROFORM-D
Creation time   = 11-MAY-2012 11:02:54
Revision time  = 17-APR-2014 11:36:12
Current time   = 17-APR-2014 11:36:23

Comment       = SS 3-15MF
Data format    = 1D COMPLEX
Data size      = 13107
Data title     = 1H
Data units     = [ppm]
Dimensions    = 1
Site           = KCI 400P
Spectrometer   = DELTA2 NMR

Field strength = 9.389766 [T] (400 [MHz])
F1 acq duration = 1.36577024 [s]
F1 domain       = 1H
F1 freq         = 399.78219838 [MHz]
F1 offset       = 5 [ppm]
F1 points       = 16354
F1 prescans     = 1
F1 resolution   = 0.73218757 [Hz]
F1 sweep        = 11.99616123 [kHz]
Irr domain      = 1H
Irr freq        = 399.78219838 [MHz]
Irr offset       = 5 [ppm]
Tri domain      = 1H
Tri freq        = 399.78219838 [MHz]
Tri offset       = 5 [ppm]
Clipped         = FALSE
Mod return      = 1
Scans           = 16
Total scans     = 16

X 90 width      = 11.57 [us]
X acq time      = 1.36577024 [s]
X angle         = 45 [deg]
X atm           = 5 [dB]
X pulse         = 5.785 [us]
Irr mode        = Off
Tri mode        = Off
Delta preset    = FALSE
Initial wait    = 1 [s]
Recvr gain      = 30
Relaxation delay = 4 [s]
Repetition time = 5.36577024 [s]
Temp get        = 22.4 [dC]
  
```

X : parts per Million : 1H

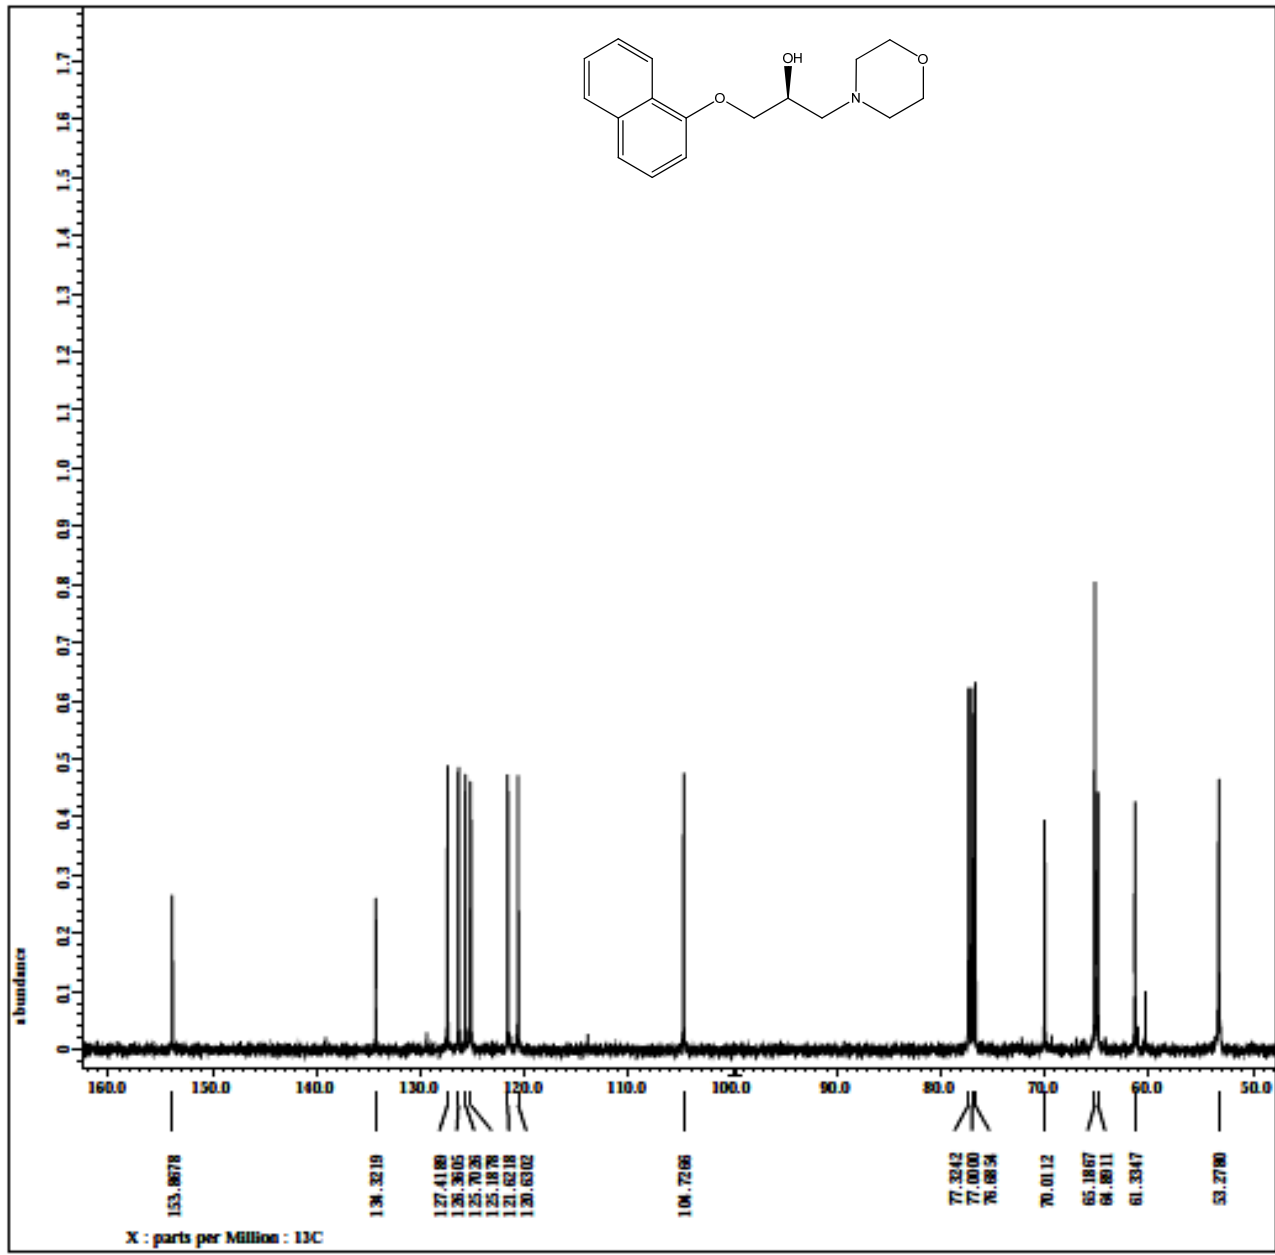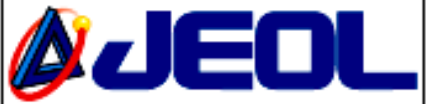

```

File name      = SS 3-15MF_CASRON-4.jd
Author        = delta
Experiment    = single pulse_dec
Sample id     = SS 3-15MF
Solvent       = CHLOROFORM-D
Creation time  = 15-MAY-2012 17:13:46
Revision time = 17-APR-2014 11:39:23
Current time  = 17-APR-2014 11:41:40

Comment       = SS 3-15MF
Data format   = 1D COMPLEX
Dim size      = 26214
Dim title     = 13C
Dim units     = [ppm]
Dimensions    = X
Site          = ECI 400P
Spectrometer  = DELTA2 400P

Field strength = 9.389766 [T] (400 [MHz])
X_acq duration = 1.04333312 [s]
X_domain       = 13C
X_freq         = 100.52530333 [MHz]
X_offset       = 100 [ppm]
X_points       = 32768
X_prescans     = 4
X_resolution   = 0.95846665 [Hz]
X_sweep        = 31.40703518 [kHz]
Irr_domain     = 1H
Irr_freq       = 399.78219838 [MHz]
Irr_offset     = 5 [ppm]
Clipped        = FALSE
Mod return     = 1
Scans          = 750
Total scans    = 750

X_90 width     = 11.75 [us]
X_acq time     = 1.04333312 [s]
X_angle        = 30 [deg]
X_atn          = 10 [dB]
X_pulse        = 3.91666667 [us]
Irr_atn_dec    = 24.95 [dB]
Irr_atn_noe    = 24.95 [dB]
Irr_noise      = WALTZ
Decoupling     = TRUE
Initial_wait   = 1 [s]
Noe            = TRUE
Noe time       = 2 [s]
Recvr gain     = 58
Relaxation delay = 2 [s]
Repetition time = 3.04333312 [s]
Temp_get       = 19 [C]
  
```

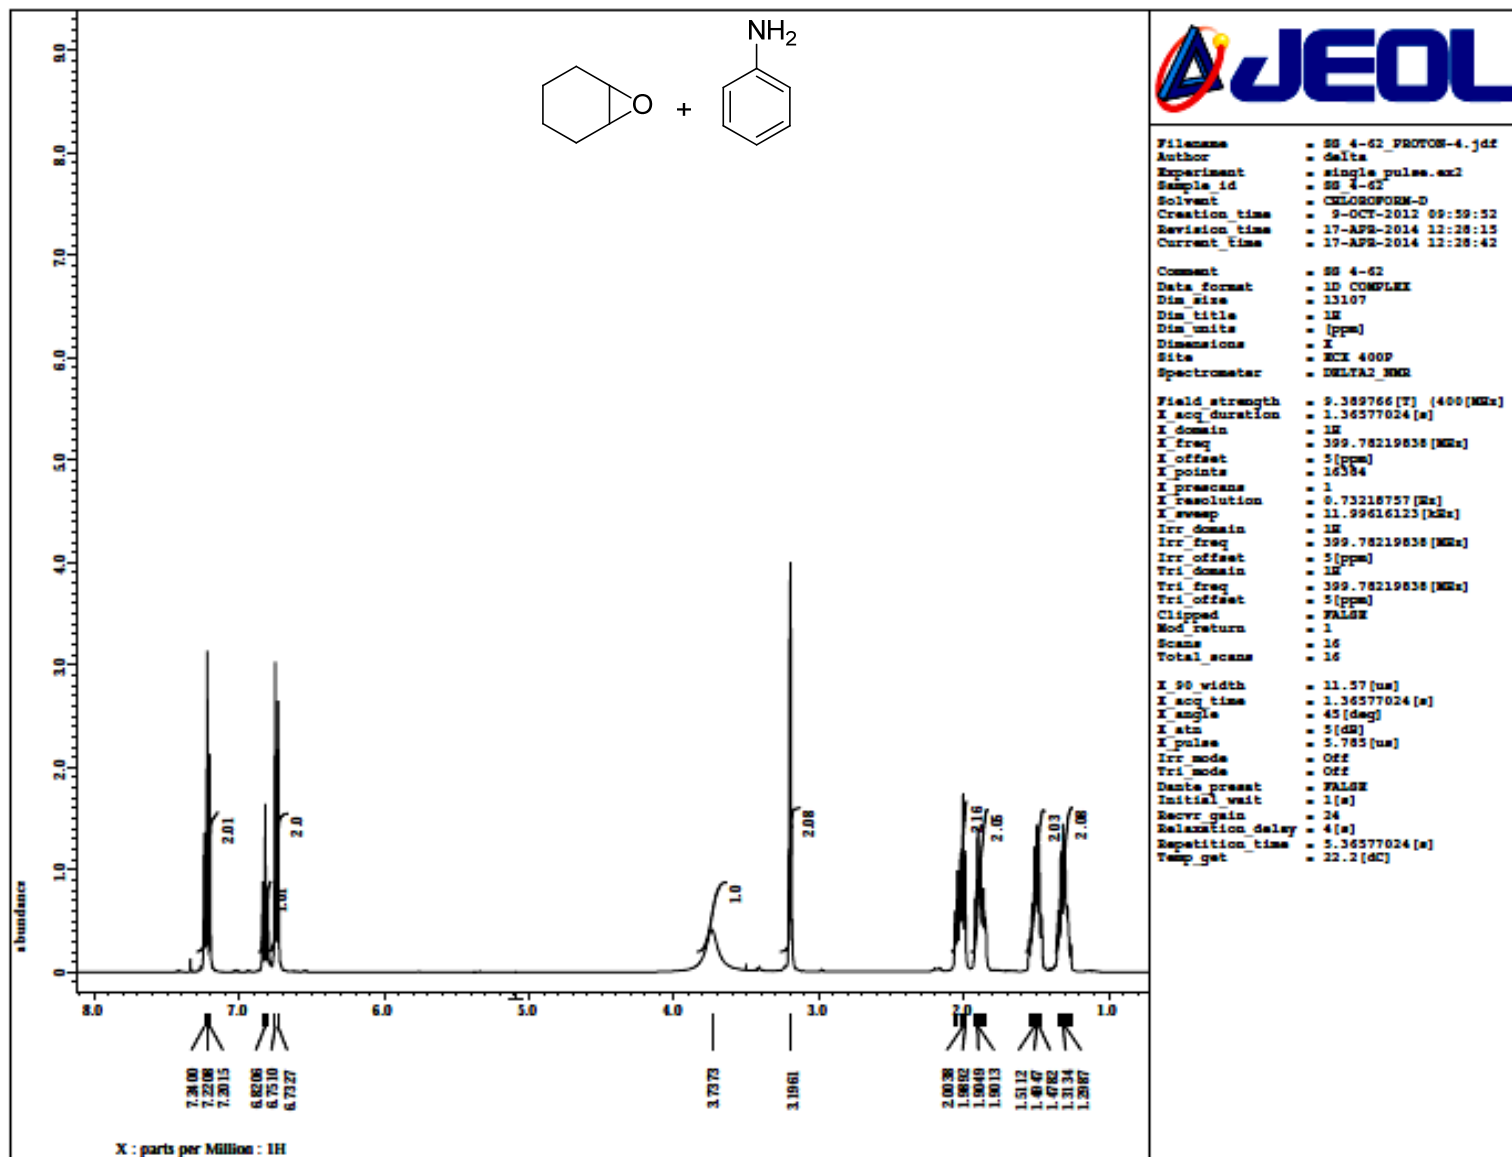

Table 1: entry (without catalyst)

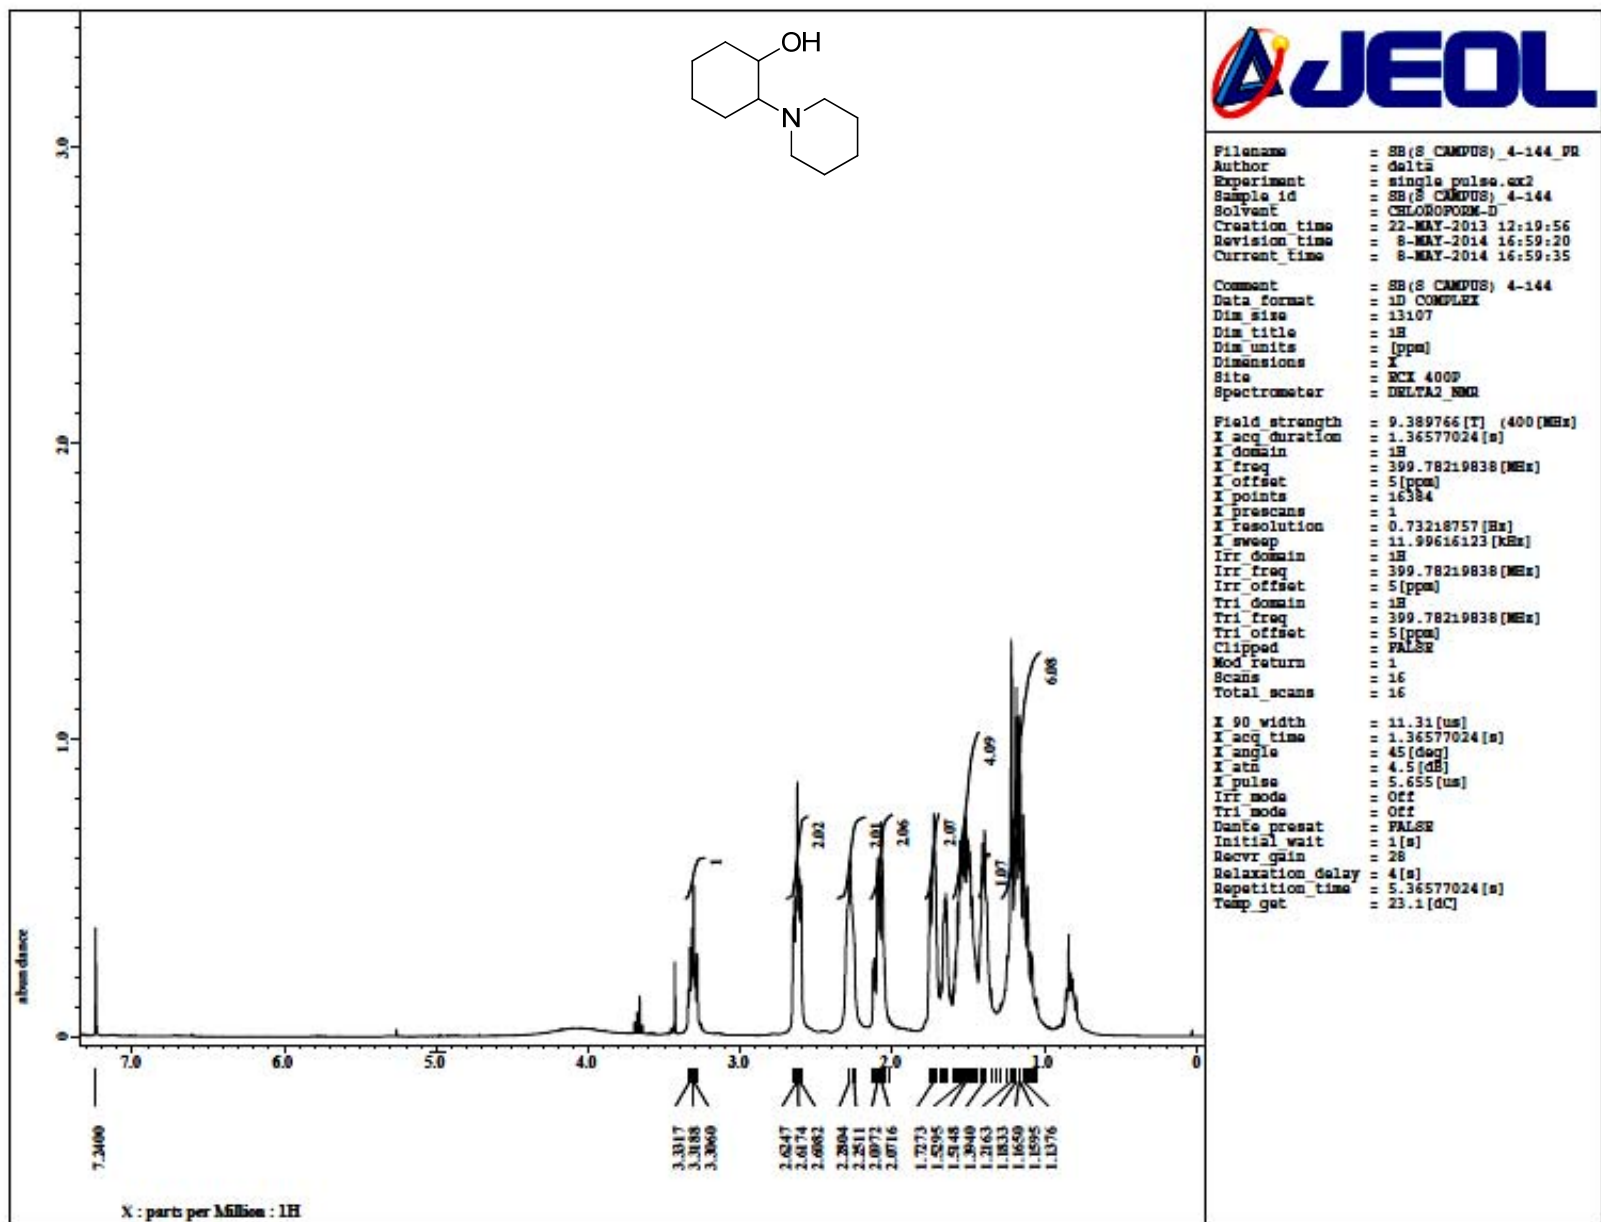

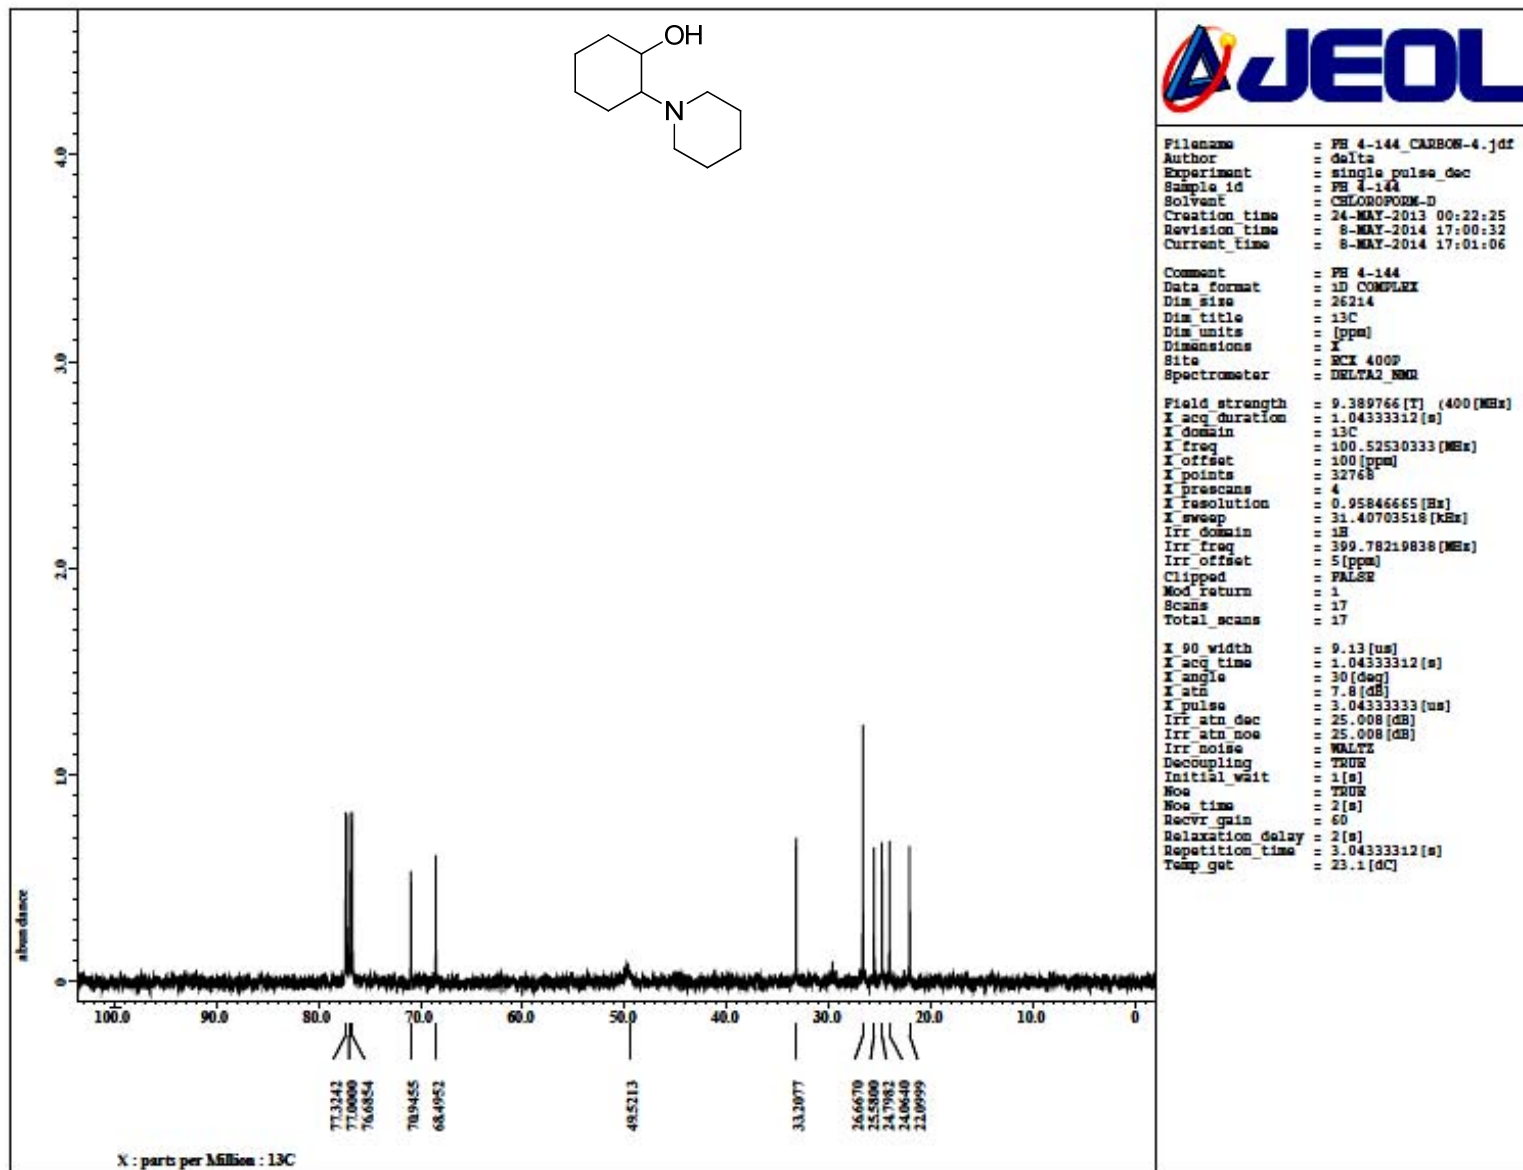

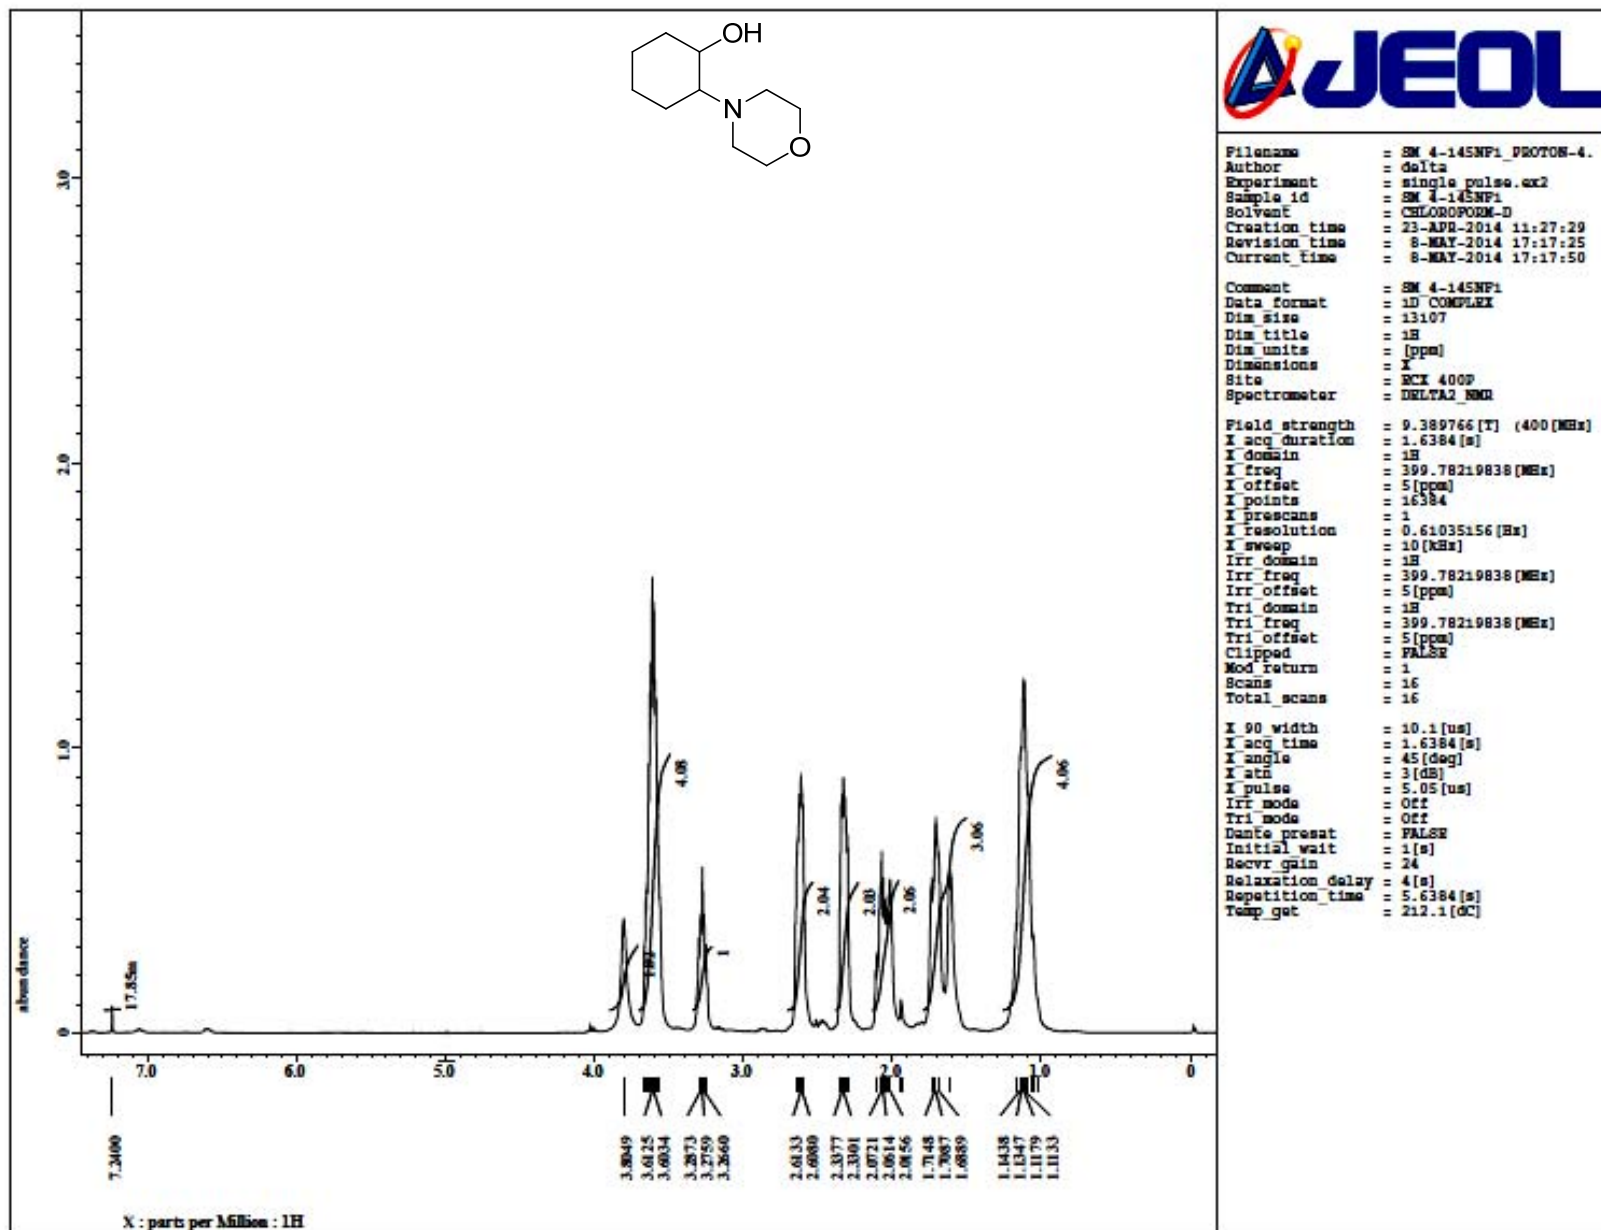

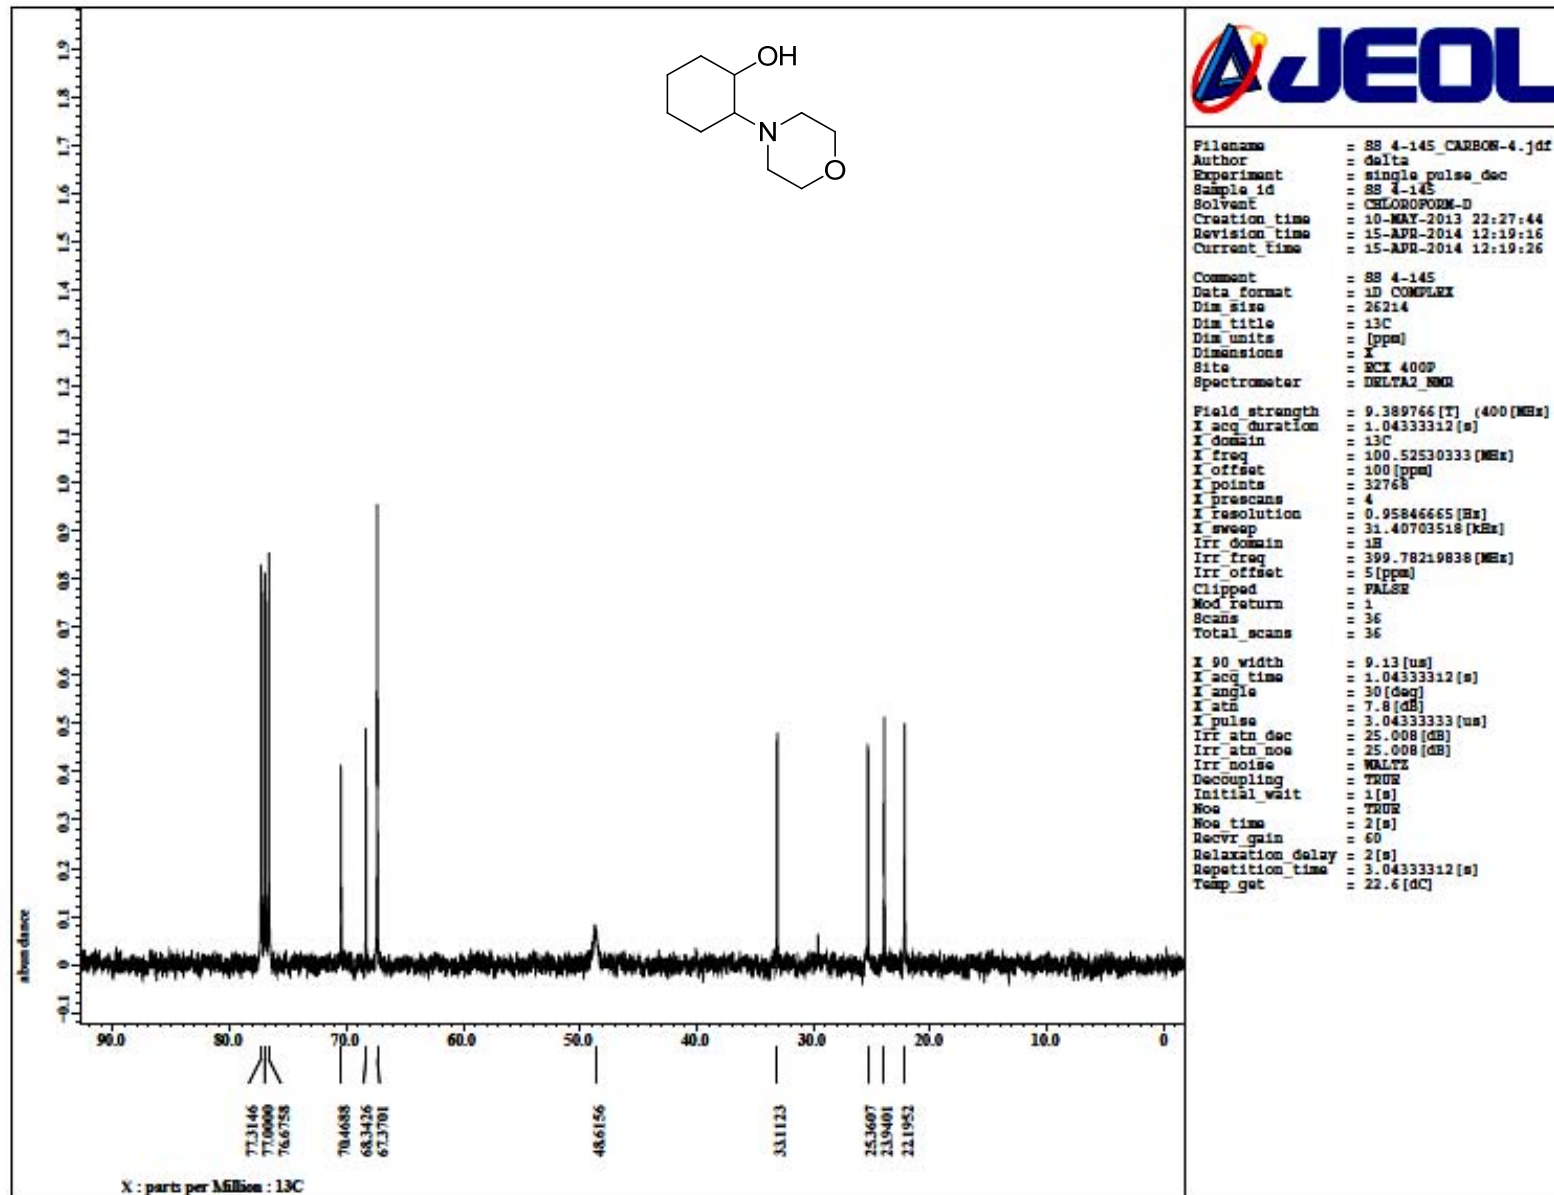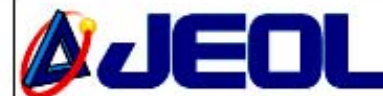

```

Filename      = 88 4-145 CARBON-4.jdf
Author       = delta
Experiment   = single pulse_dec
Sample id    = 88 4-145
Solvent      = CHLOROFORM-D
Creation time = 10-MAY-2013 22:27:44
Revision time = 15-APR-2014 12:19:16
Current time  = 15-APR-2014 12:19:26

Comment      = 88 4-145
Data format  = 1D COMPLEX
Dim size     = 26214
Dim title    = 13C
Dim units    = [ppm]
Dimensions   = 1
Site         = ECI 400P
Spectrometer = DELTA2 NMR

Field strength = 9.389766 [T] (400 [MHz])
F1 acq duration = 1.04333312 [s]
F1 domain      = 13C
F1 freq        = 100.52530333 [MHz]
F1 offset      = 100 [ppm]
F1 points      = 32768
F1 prescans    = 4
F1 resolution  = 0.95846665 [Hz]
F1 sweep       = 31.40703518 [kHz]
F1 domain      = 1H
F1 freq        = 399.78219838 [MHz]
F1 offset      = 5 [ppm]
Clipped       = FALSE
Mod Return    = 1
Scans         = 36
Total scans   = 36

F2 90 width   = 9.13 [us]
F2 acq time   = 1.04333312 [s]
F2 angle      = 30 [deg]
F2 atn        = 7.8 [dB]
F2 pulse      = 3.04333333 [us]
F2 atn dec    = 25.008 [dB]
F2 atn noe    = 25.008 [dB]
F2 noise      = WALTZ
Decoupling    = TRUE
Initial wait  = 1 [s]
Noe           = TRUE
Noe time      = 2 [s]
Recvr gain    = 60
Relaxation delay = 2 [s]
Repetition time = 3.04333312 [s]
Temp get      = 22.6 [dC]

```

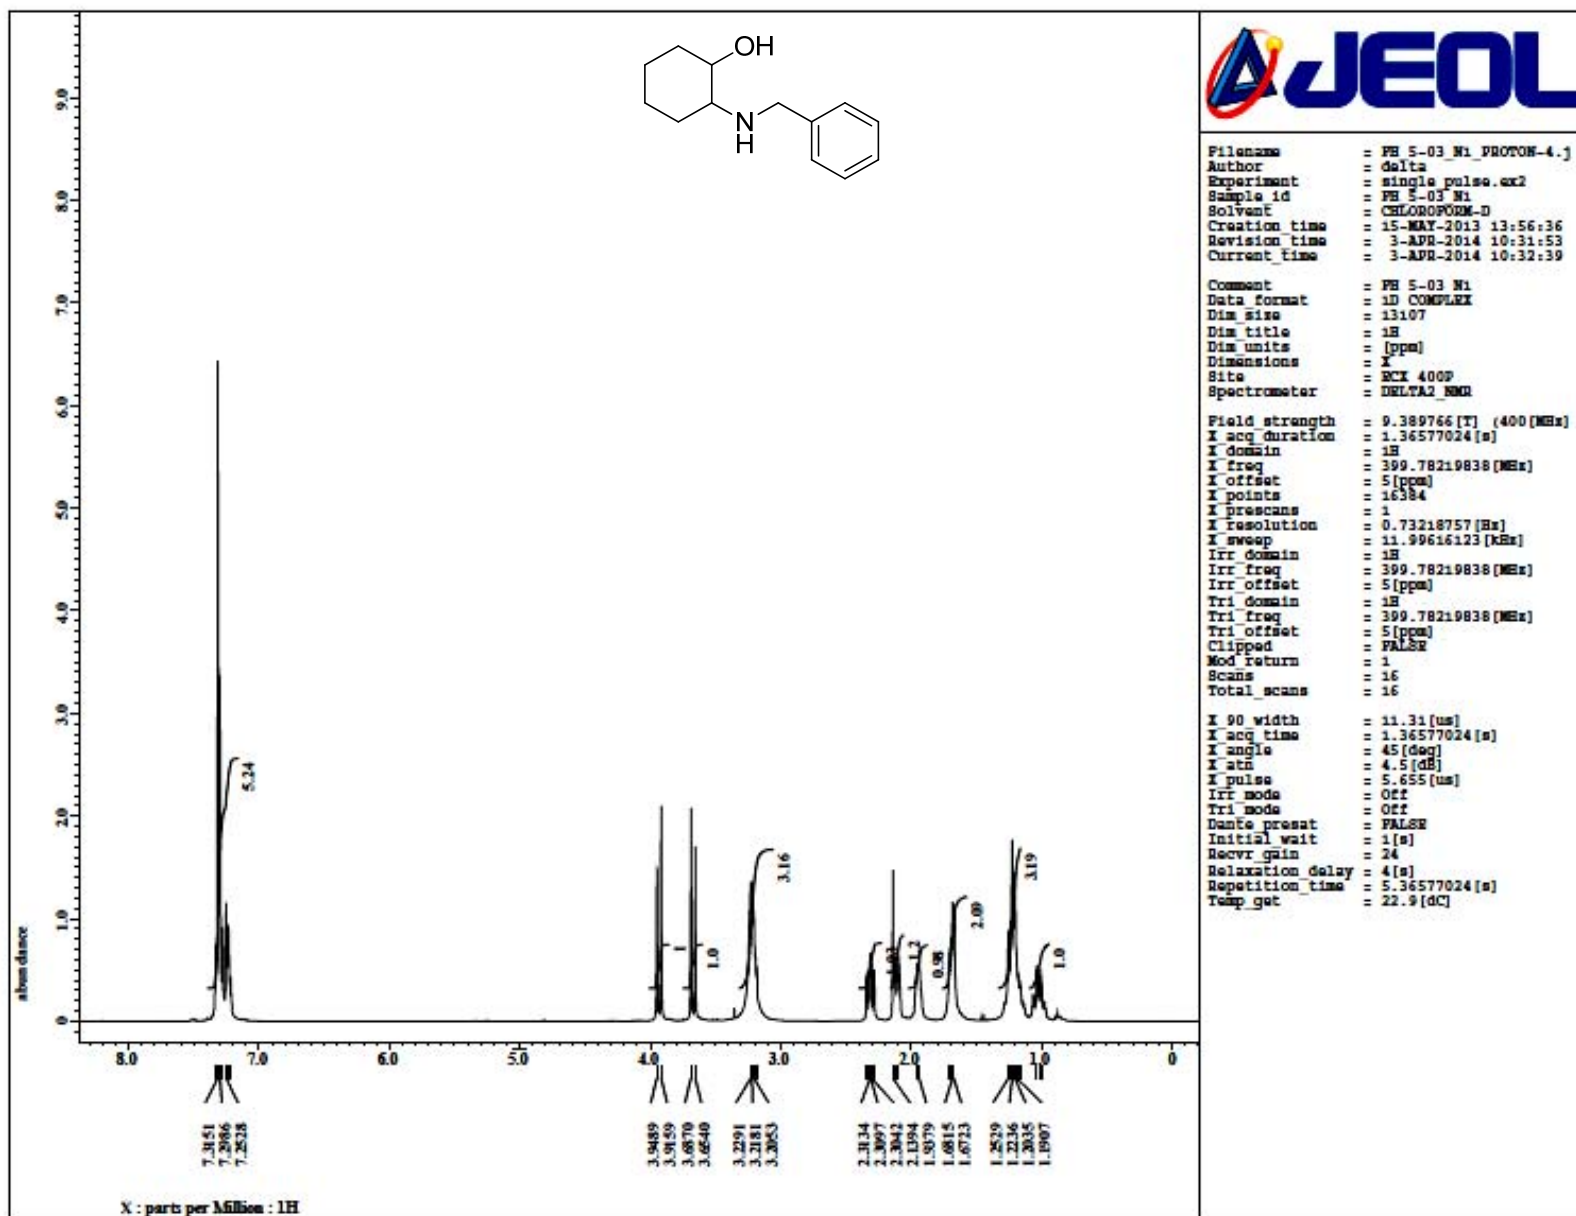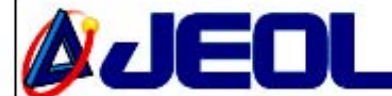

```

Filename      = PB 5-03 N1 PHOTON-4.]
Author       = delta
Experiment   = single pulse.ex2
Sample id    = PB 5-03 N1
Solvent      = CHLOROFORM-D
Creation time = 15-MAY-2013 13:56:36
Revision time = 3-APR-2014 10:31:53
Current_time = 3-APR-2014 10:32:39

Comment      = PB 5-03 N1
Data format  = 1D COMPLEX
Dim size     = 13107
Dim title    = 1H
Dim units    = [ppm]
Dimensions   = X
Site         = ECI 400P
Spectrometer = DELTA2 NMR

Field strength = 9.389766 [T] (400 [MHz])
F1 acq duration = 1.36577024 [s]
F1 domain      = 1H
F1 freq       = 399.78219838 [MHz]
F1 offset     = 5 [ppm]
F1 points     = 16384
F1 prescans   = 1
F1 resolution = 0.73218757 [Hz]
F1 sweep      = 11.99616123 [kHz]
F1r domain    = 1H
F1r freq      = 399.78219838 [MHz]
F1r offset    = 5 [ppm]
F1r domain    = 1H
F1r freq      = 399.78219838 [MHz]
F1r offset    = 5 [ppm]
Clipped      = FALSE
Mod return   = 1
Scans        = 16
Total scans  = 16

F2 90 width   = 11.31 [us]
F2 acq time   = 1.36577024 [s]
F2 angle      = 45 [deg]
F2 attn       = 4.5 [dB]
F2 pulse     = 5.655 [us]
F2r mode     = Off
F2r mode     = Off
Dante preset = FALSE
Initial wait  = 1 [s]
Recvr gain   = 24
Relaxation delay = 4 [s]
Repetition time = 5.36577024 [s]
Temp_gat     = 22.9 [dC]
  
```



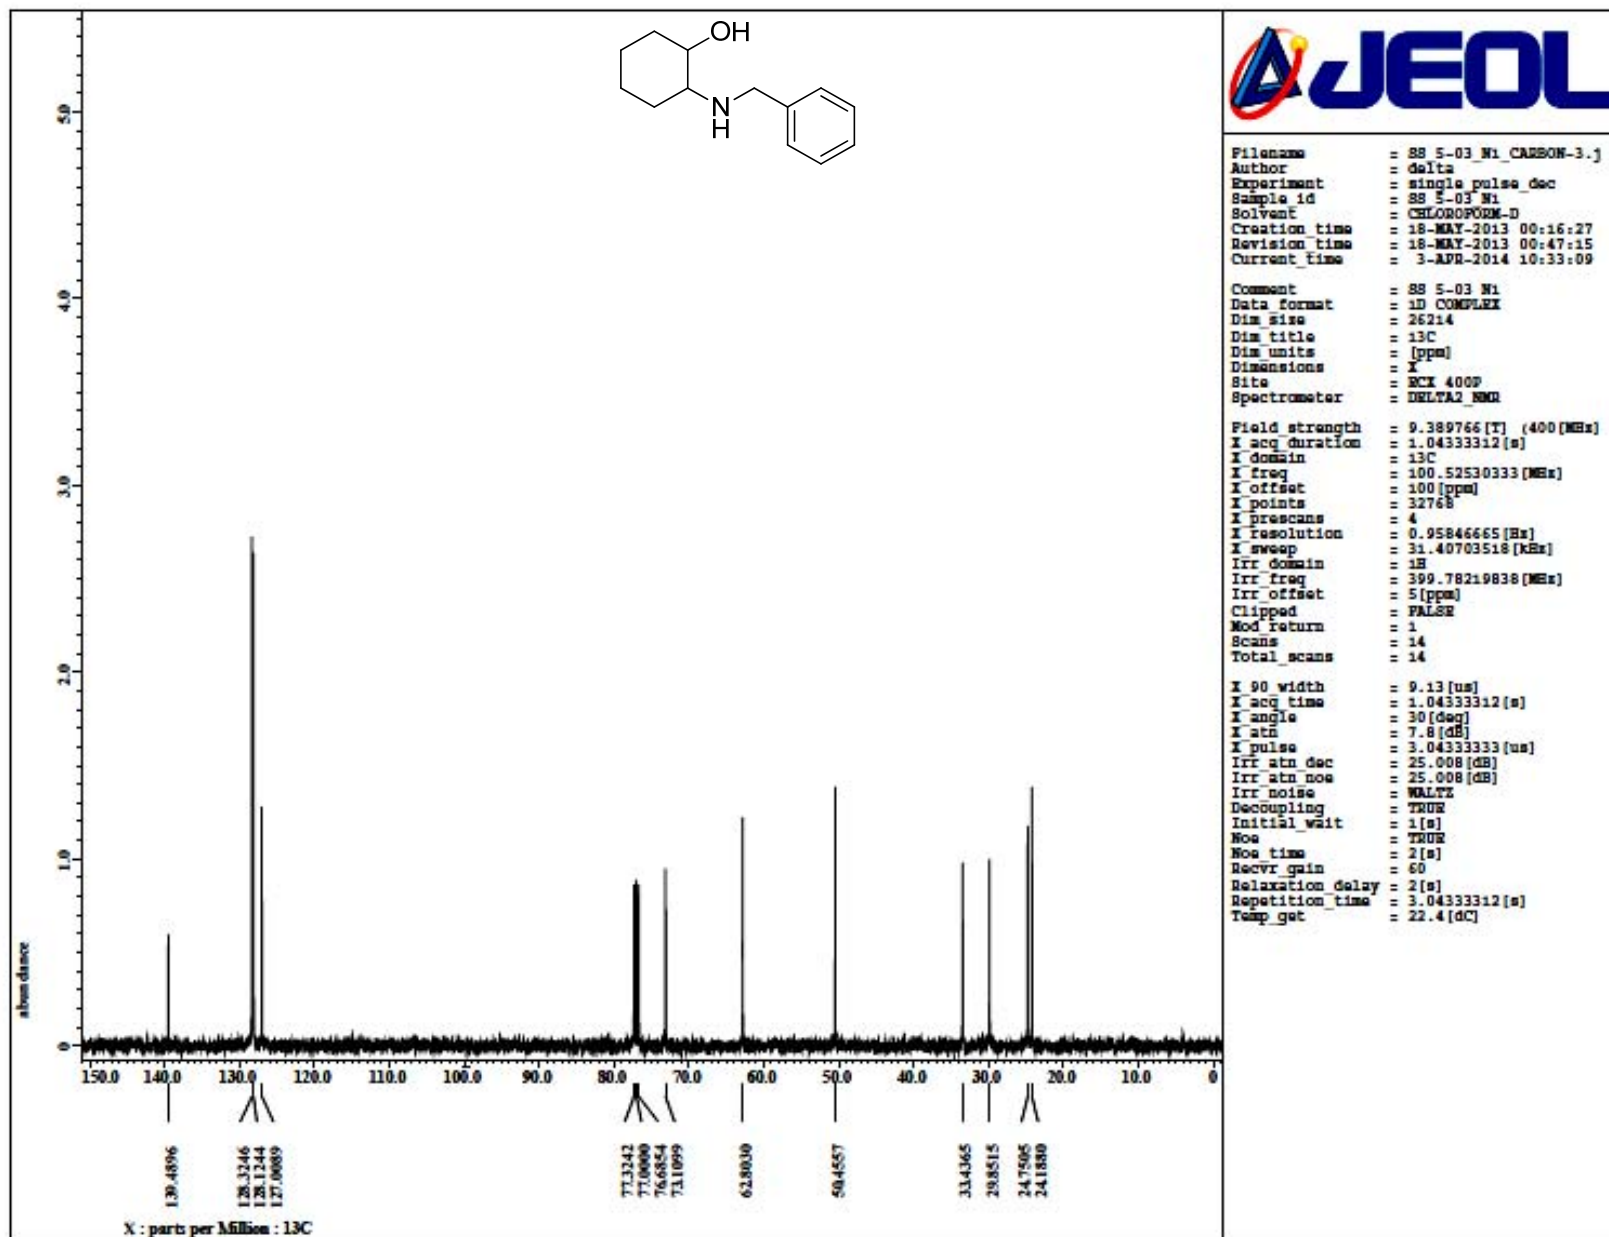

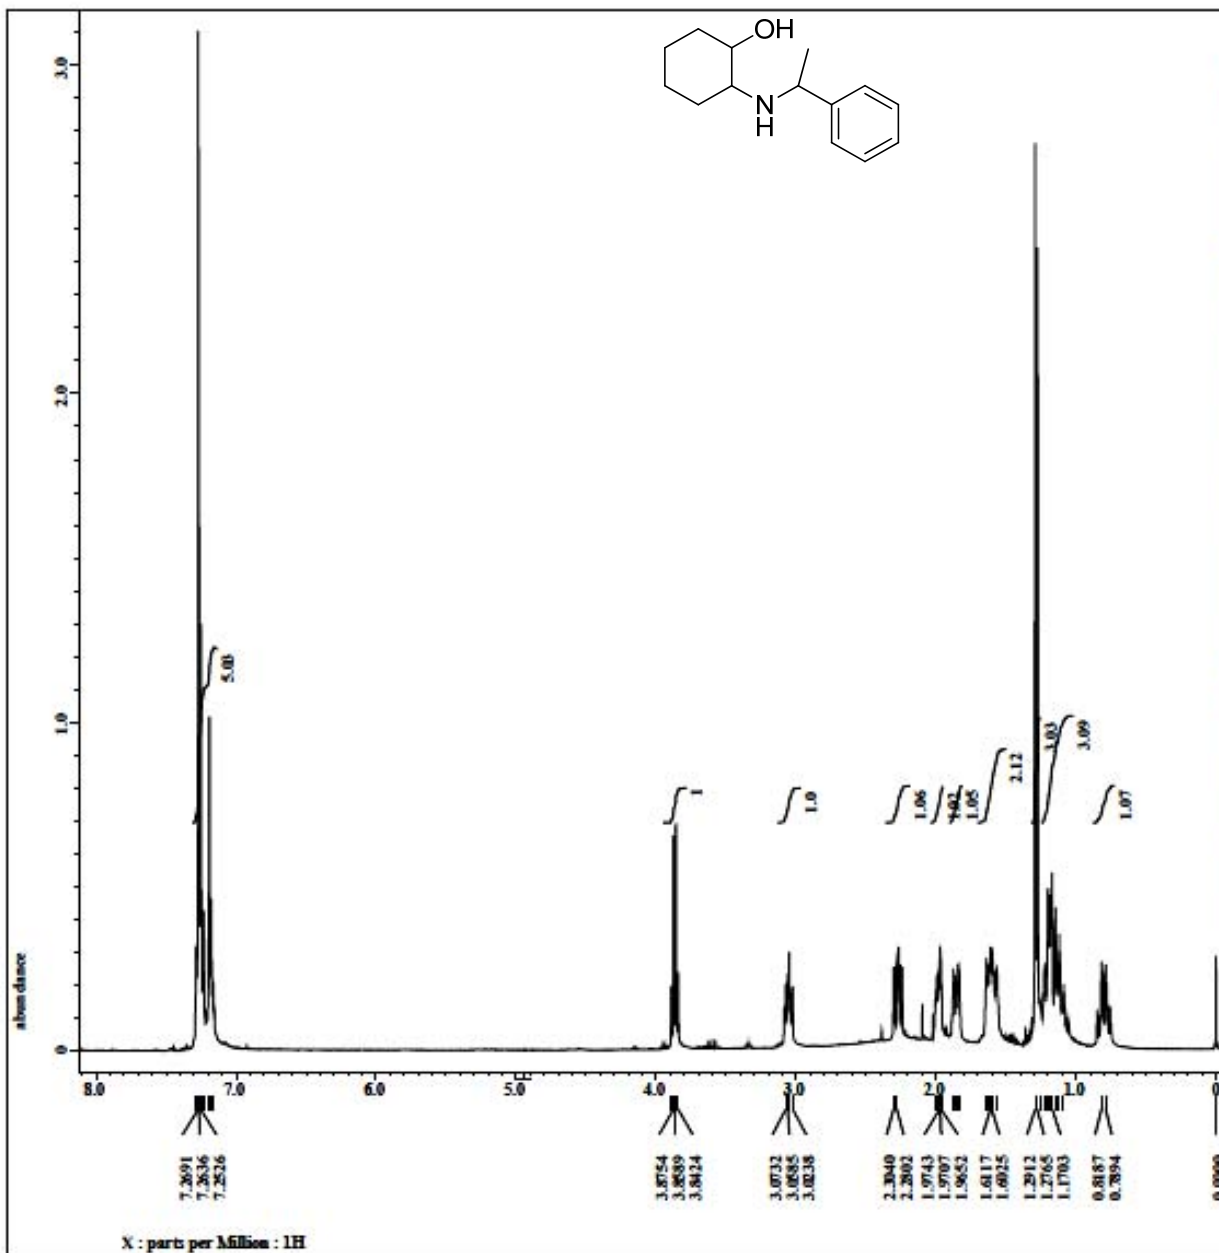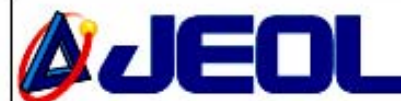

Filename = PH 5-04\_M2\_PROTON-6.j  
 Author = delta  
 Experiment = single pulse.ex2  
 Sample id = PH 5-04\_M2  
 Solvent = CHLOROFORM-D  
 Creation time = 4-JUN-2013 12:54:47  
 Revision time = 15-APR-2014 12:14:58  
 Current time = 15-APR-2014 12:15:24

Comment = PH 5-04\_M2  
 Data format = 1D COMPLEX  
 Data size = 13107  
 Data title = 1H  
 Data units = [ppm]  
 Dimensions = 1  
 Site = ECK 400P  
 Spectrometer = DELTA2\_NMR

Field strength = 9.389766 [T] (400 [MHz])  
 X acq duration = 1.36577024 [s]  
 X domain = 1H  
 X freq = 399.78219838 [MHz]  
 X offset = 5 [ppm]  
 X points = 16384  
 X prescans = 1  
 X resolution = 0.73218757 [Hz]  
 X sweep = 11.99616123 [kHz]  
 Irr domain = 1H  
 Irr freq = 399.78219838 [MHz]  
 Irr offset = 5 [ppm]  
 Tri domain = 1H  
 Tri freq = 399.78219838 [MHz]  
 Tri offset = 5 [ppm]  
 Clipped = FALSE  
 Mod return = 1  
 Scans = 16  
 Total scans = 16

X 90 width = 11.31 [us]  
 X acq time = 1.36577024 [s]  
 X angle = 45 [deg]  
 X atn = 4.5 [dB]  
 X pulse = 5.655 [us]  
 Irr mode = Off  
 Tri mode = Off  
 Dante presat = FALSE  
 Initial wait = 1 [s]  
 Recvr gain = 30  
 Relaxation delay = 4 [s]  
 Repetition time = 5.36577024 [s]  
 Temp set = 23 [dC]

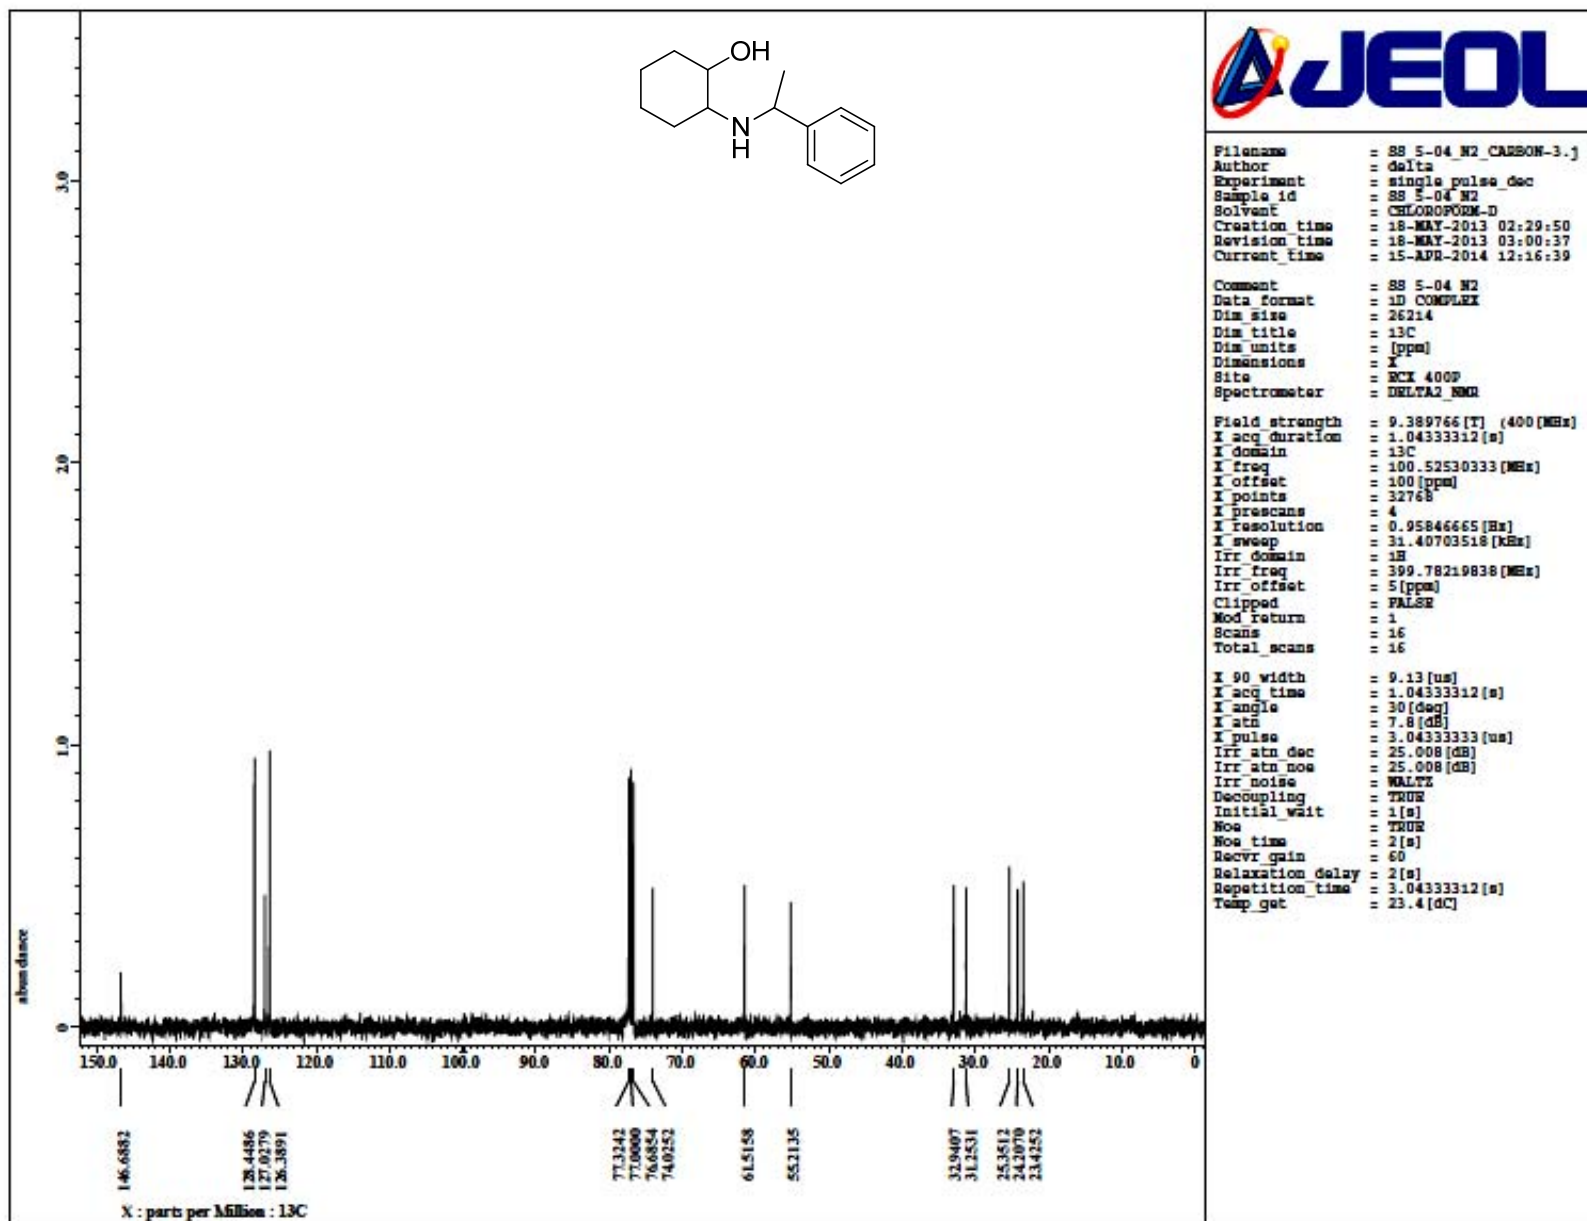

## GC chromatogram for the table 2

**Conditions for GC:** GC parameters for capillary columns (30 m × 0.25 mm): injector 250 °C; detector 250 °C; oven 100 °C for 3 min then 5 °C min<sup>-1</sup> until 180 °C for 15 min; column pressure 118.3 kPa, column flow 1.36 mL min<sup>-1</sup>; linear velocity 35 cm s<sup>-1</sup>; total flow 45.1 mL min<sup>-1</sup>.

Trans-2-(piperidin-1-yl)cyclohexanol

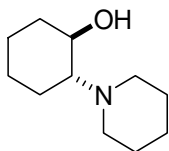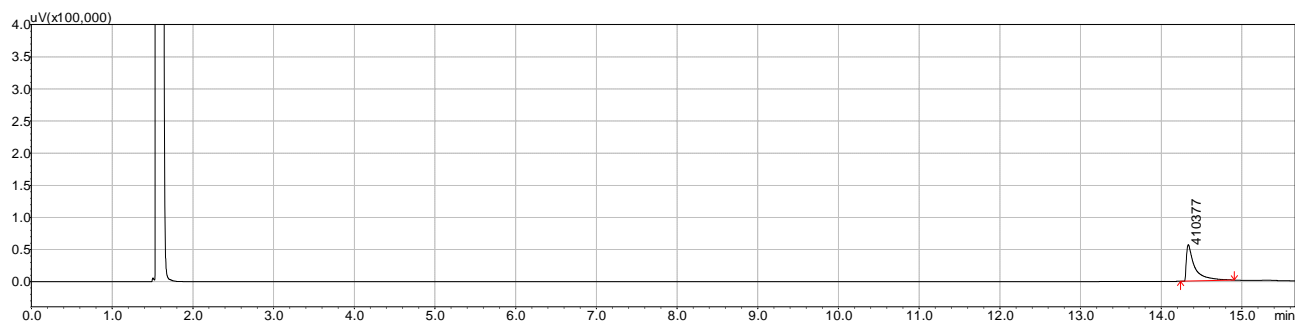

| Peak# | Ret.Time | Area     | Height  | Conc.    | Area%    |
|-------|----------|----------|---------|----------|----------|
| 1     | 14.336   | 410377.3 | 56495.7 | 100.0000 | 100.0000 |

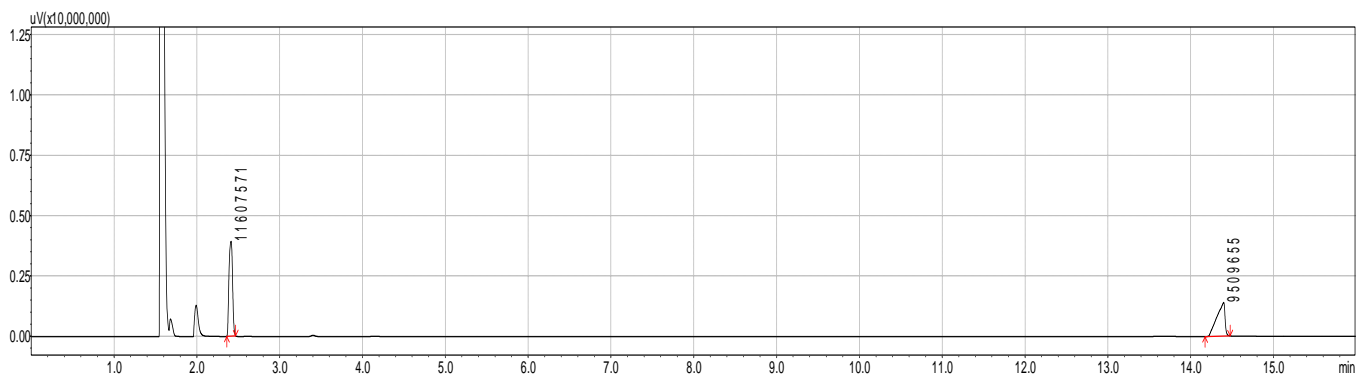

| Peak | Ret.Time | Area       | Height    | Conc.    | Area%   |
|------|----------|------------|-----------|----------|---------|
| 1    | 2.412    | 11607571.0 | 3885690.0 | 54.96731 | 54.9673 |
| 2    | 14.398   | 9509654.7  | 1388792.0 | 45.03269 | 45.0327 |

Trans-2-morpholinocyclohexanol

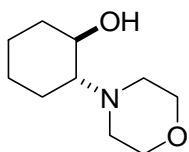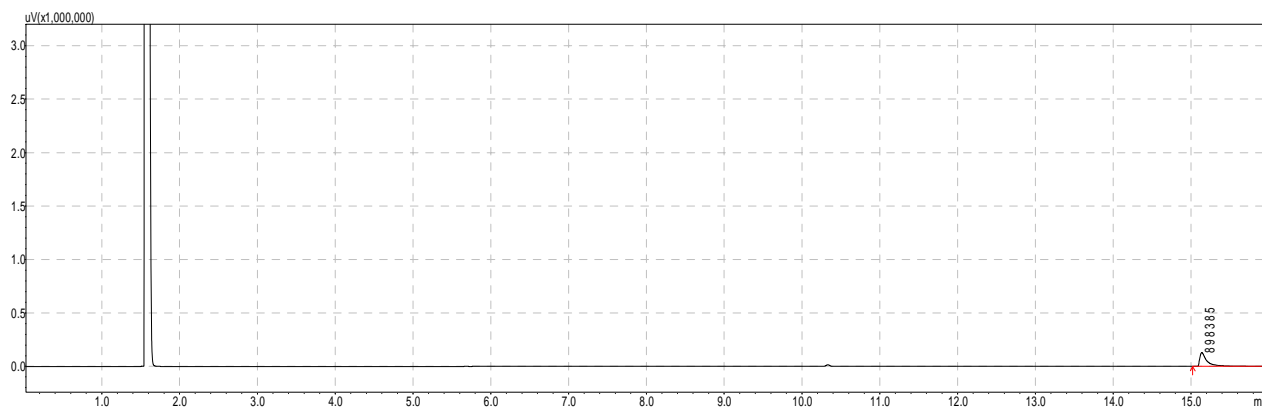

| Peak# | Ret.Time | Area     | Height   | Conc.    | Area%    |
|-------|----------|----------|----------|----------|----------|
| 1     | 15.140   | 898384.7 | 129738.9 | 100.0000 | 100.0000 |

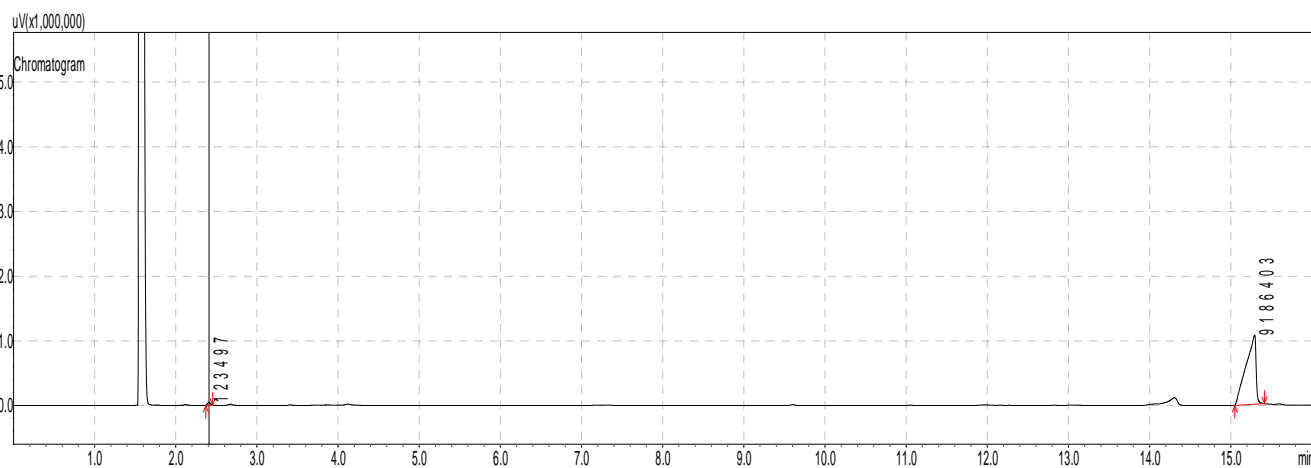

| Peak | Ret.Time | Area      | Height    | Conc.    | Area%   |
|------|----------|-----------|-----------|----------|---------|
| 1    | 2.409    | 123497.0  | 48783.9   | 1.32651  | 1.3265  |
| 2    | 15.294   | 9186403.0 | 1069509.8 | 98.67349 | 98.6735 |

Trans-2-(benzylamino)cyclohexanol :

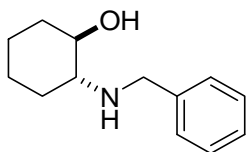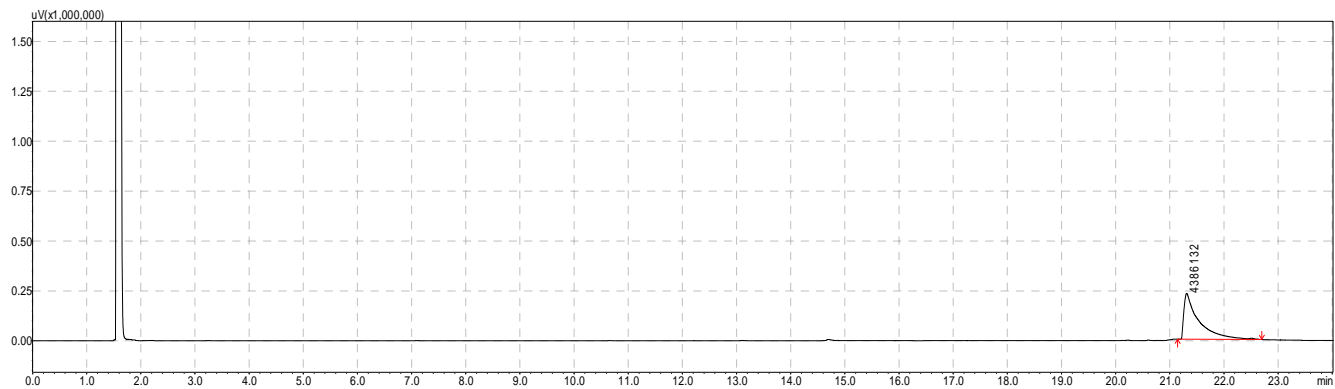

| Peak# | Ret.Time | Area      | Height   | Conc.    | Area%    |
|-------|----------|-----------|----------|----------|----------|
| 1     | 21.312   | 4386132.2 | 229637.6 | 100.0000 | 100.0000 |

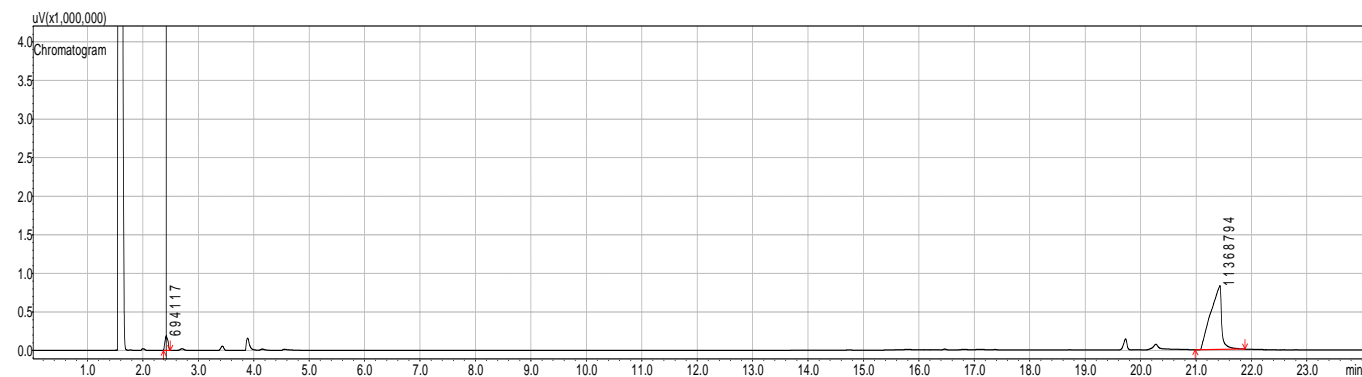

| Peak | Ret.Time | Area       | Height   | Conc.    | Area%   |
|------|----------|------------|----------|----------|---------|
| 1    | 2.421    | 694117.5   | 185040.6 | 5.75415  | 5.7541  |
| 2    | 21.431   | 11368794.5 | 826008.3 | 94.24585 | 94.2459 |

Trans-2-((S)-1-phenylethylamino)cyclohexanol :

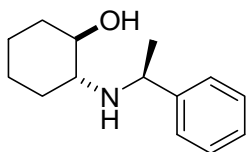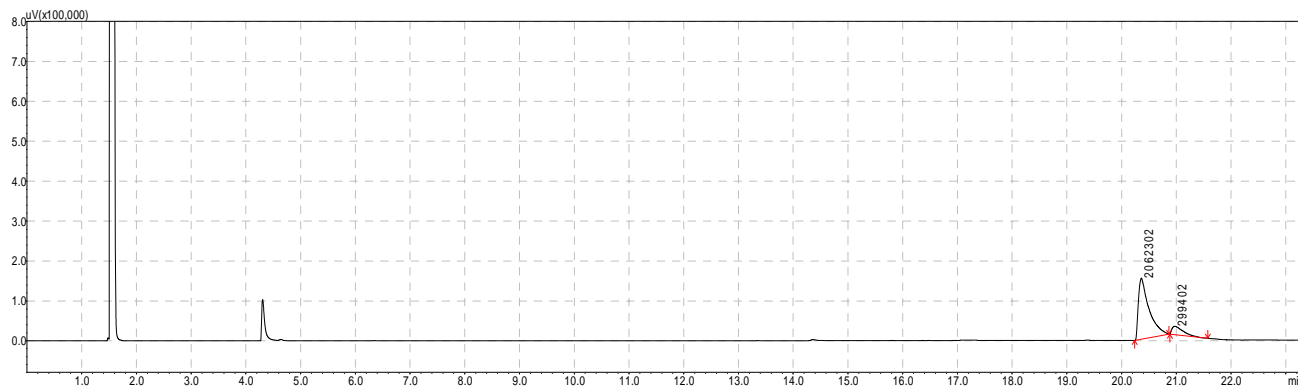

| Peak# | Ret.Time | Area      | Height   | Conc.    | Area%   |
|-------|----------|-----------|----------|----------|---------|
| 1     | 20.363   | 2062301.8 | 152902.8 | 87.32261 | 87.3226 |
| 2     | 20.974   | 299402.4  | 21296.3  | 12.67739 | 12.6774 |

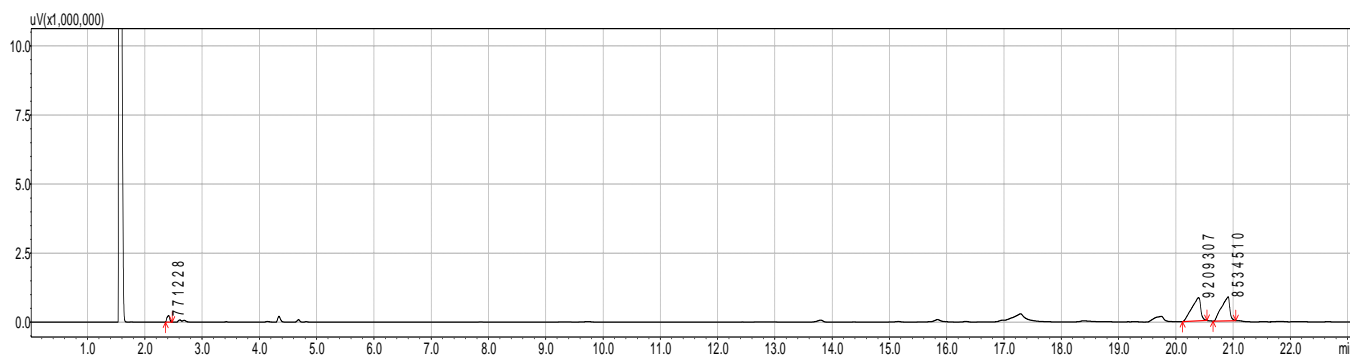

| Peak | Ret.Time | Area      | Height   | Conc.    | Area%   |
|------|----------|-----------|----------|----------|---------|
| 1    | 2.415    | 771228.4  | 239607.3 | 4.16541  | 4.1654  |
| 2    | 20.399   | 9209306.9 | 839048.6 | 49.73959 | 49.7396 |
| 3    | 20.915   | 8534510.1 | 861032.9 | 46.09500 | 46.0950 |
